# Supplementary material for: Synthetic routes to trifluoromethylphenyl diazirine photolabeling reagents containing an alkyne substituent (TPDYNE) for chemical biology applications
Source: Royal Society of Chemistry journal article supplement (doi:10.1039/d3ra07260f), 2023-01-01

Supplemental Information

**Synthetic routes to trifluoromethylphenyl diazirine photolabeling reagents containing an alkyne  
substituent (TPDYNE) for chemical biology applications**

Mingxing Qian<sup>a</sup>, Yuanjian Xu<sup>a</sup> and Douglas F. Covey<sup>\*,a,b,c,d</sup>

<sup>a,b,c</sup>Departments of Developmental Biology, Anesthesiology and Psychiatry

Taylor Family Institute for Innovative Psychiatric Research

Washington University in St. Louis

660 S. Euclid Ave.

St. Louis, MO 63110

**Table of Contents**

|                                                                                                               |         |
|---------------------------------------------------------------------------------------------------------------|---------|
| <sup>1</sup> H NMR (400 MHz) spectra for compounds <b>3a-3c, 5-15, 17, 18, 20-24, 26, 27, 29, 31-34</b> ..... | S2-S30  |
| <sup>13</sup> C NMR (100 MHz) spectra for compounds <b>3a-3c, 5-15, 17,18, 20-24, 26, 27, 29, 31-34</b> ..... | S31-S58 |

12055

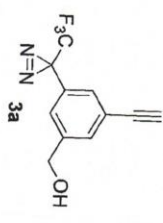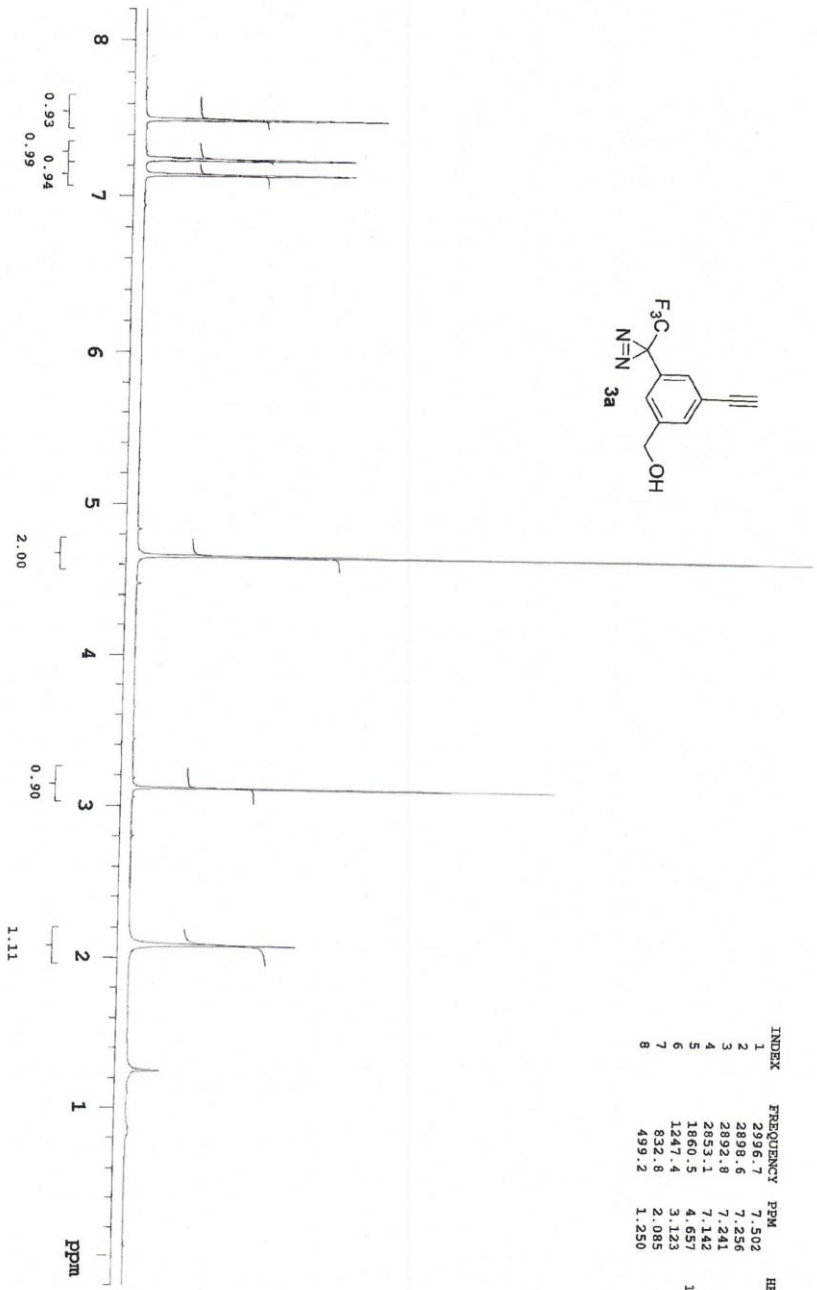

mq12088

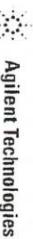

Sample Name: mq12088  
Data Collected on: busch.wustl.edu-vnmrs400  
Archive directory: /home/vnmr\_dc/vnmrSYS/data  
Sample directory: mq12088\_20220105\_01  
FIDFile: PROTON\_01  
Pulse Sequence: PROTON (a2pu1)  
Solvent: cdcl3  
Data collected on: Jan 5 2022

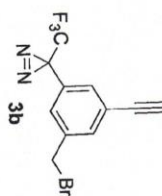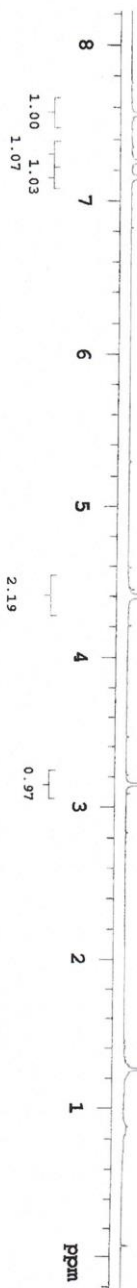

mg12068

Sample Name:

mg12078

Data Collected on:

busch.kustl.edu-ymms400

Archive directory:

/home/vnmr\_dc/vnmrsys/data

Sample directory:

mg12078\_20211217\_01

FidFile: PROTON\_01

Pulse Sequence: PROTON (s2pul)

Solvent: cdcl3

Data collected on: Dec 17 2021

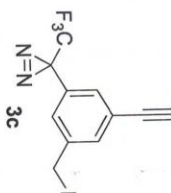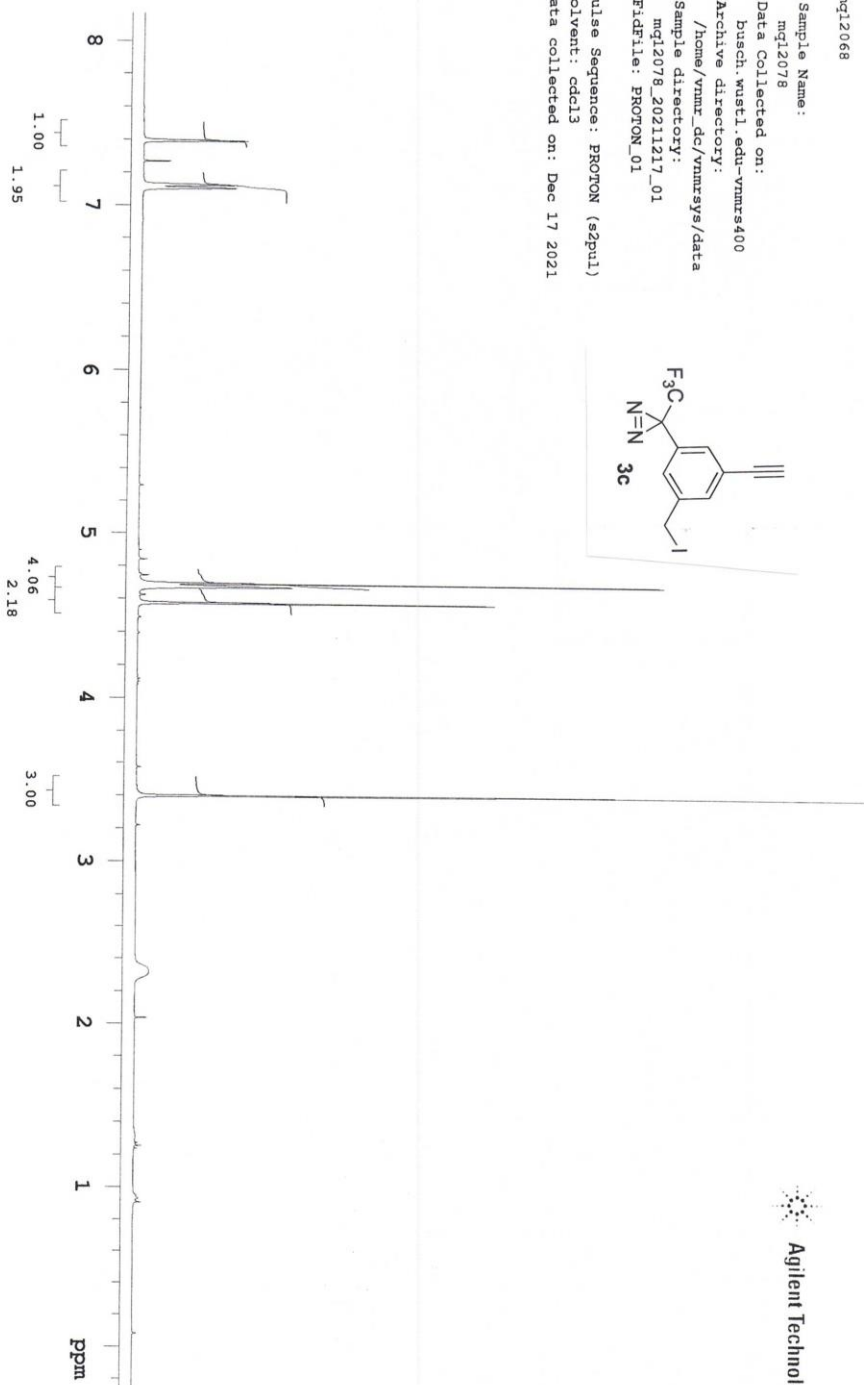

Agilent Technologies

mq13235

Sample Name:  
mq13235  
Data Collected on:  
busch.wustl.edu-ymms400  
Archive directory:  
/home/ymms\_dc/ymmsys/data  
Sample directory:  
mq13235\_20231003\_01  
FIDFile: PROTON\_01

Pulse Sequence: PROTON (s2pul)  
Solvent: cdcl3  
Data collected on: Oct 3 2023

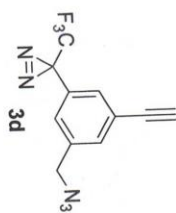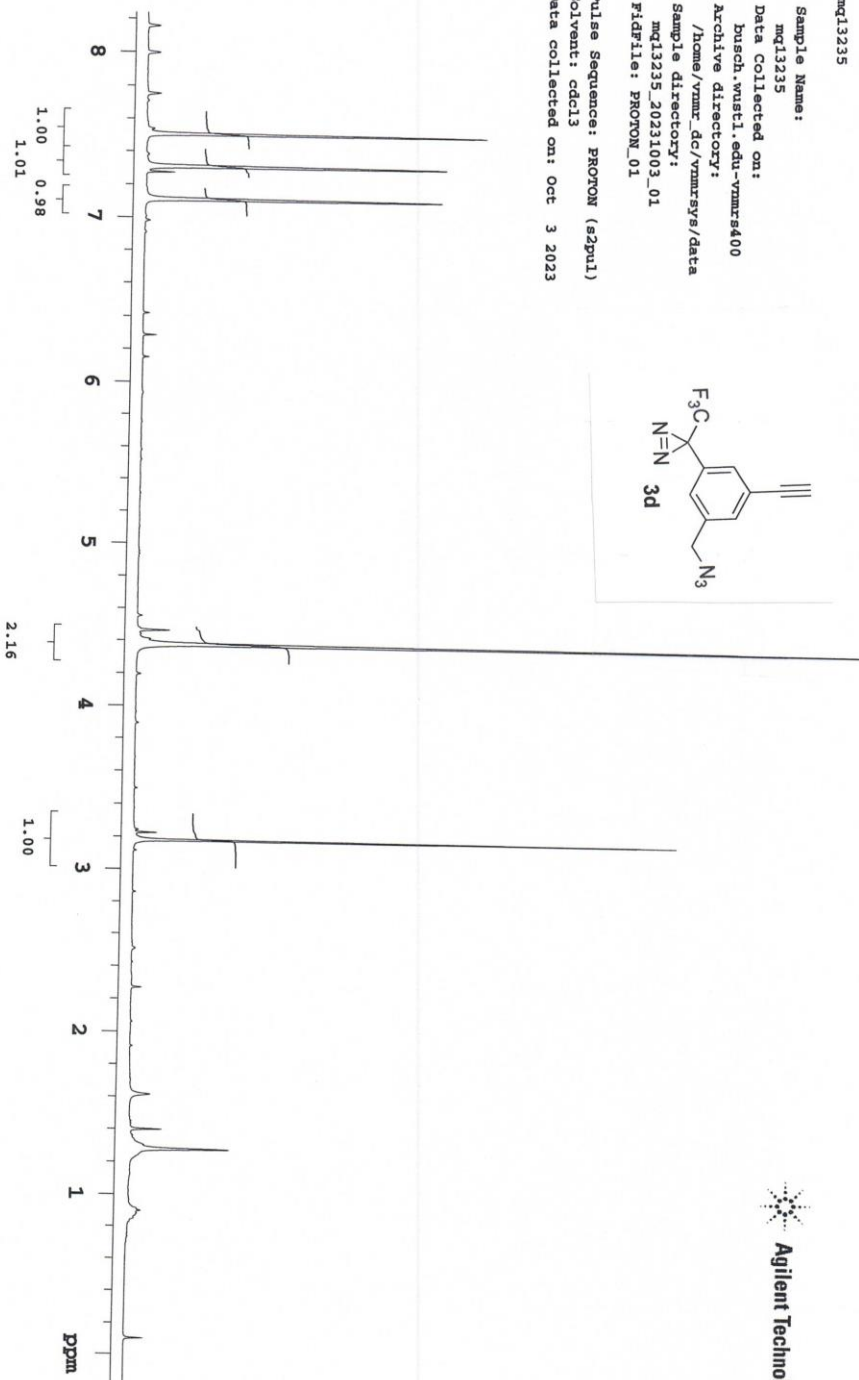

Agilent Technologies

mg13237

Sample Name:  
mg13237  
Data Collected on:  
busch.wustl.edu-vmrns400  
Archive directory:  
/home/vmr\_dc/vmrns400/data  
Sample directory:  
mg13237\_20231004\_04  
FIDFile: PROTON\_01  
Pulse Sequence: PROTON (s2pu1)  
Solvent: cdcl3  
Data collected on: Oct 4 2023

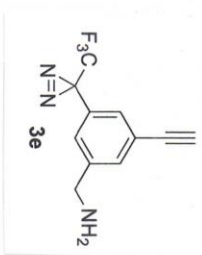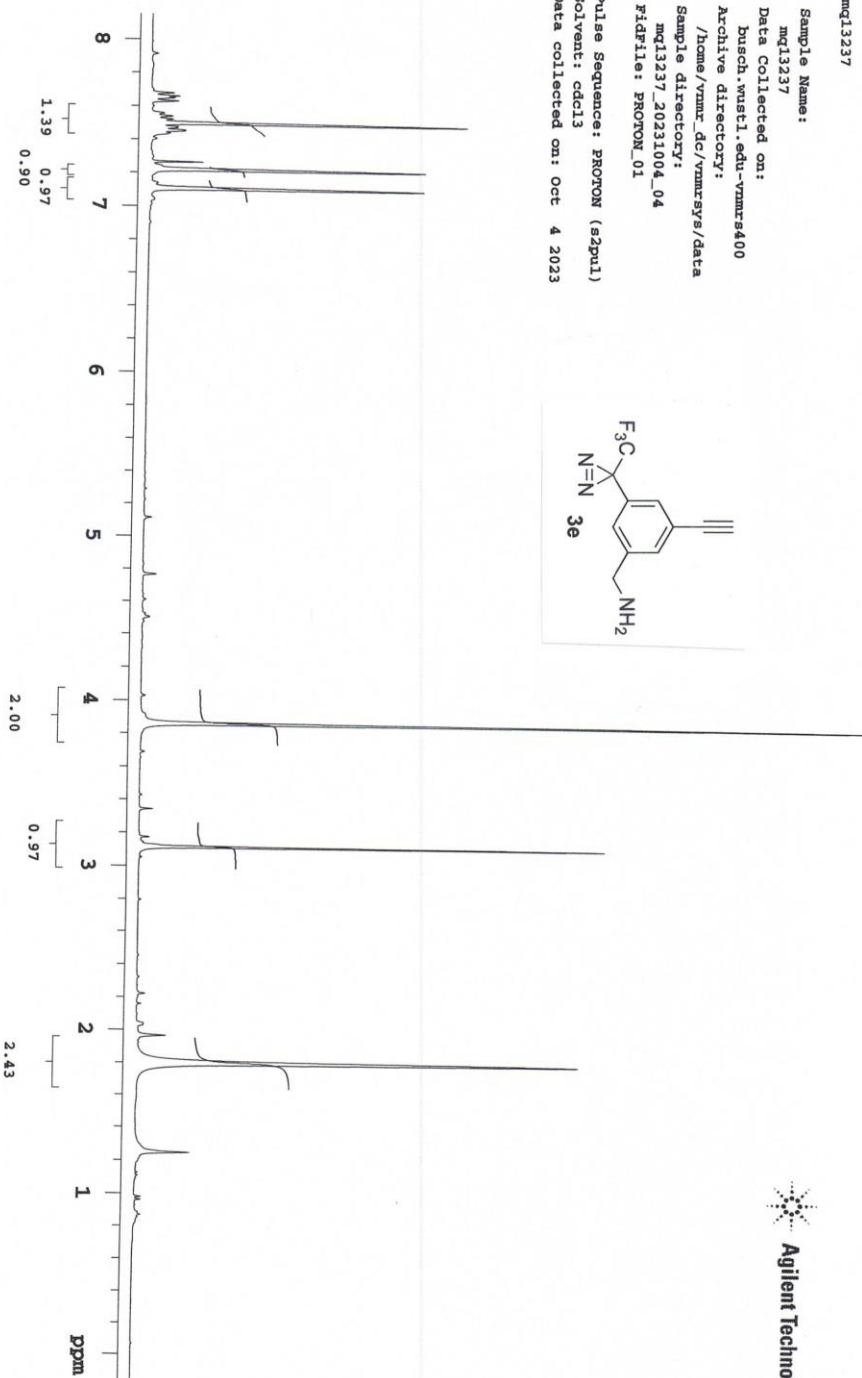

Agilent Technologies

mq12018

Sample Name:

mq12018

Data Collected on:

busch.wustl.edu-ymrs400

Archive directory:

/home/ymr\_dc/ymrsys/data

Sample directory:

mq12018\_20211008\_01

Fidfile: PROTON\_01

Pulse Sequence: PROTON (s2pu1)

Solvent: cdcl3

Data collected on: Oct 8 2021

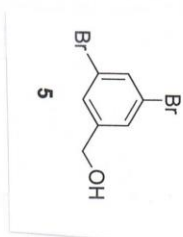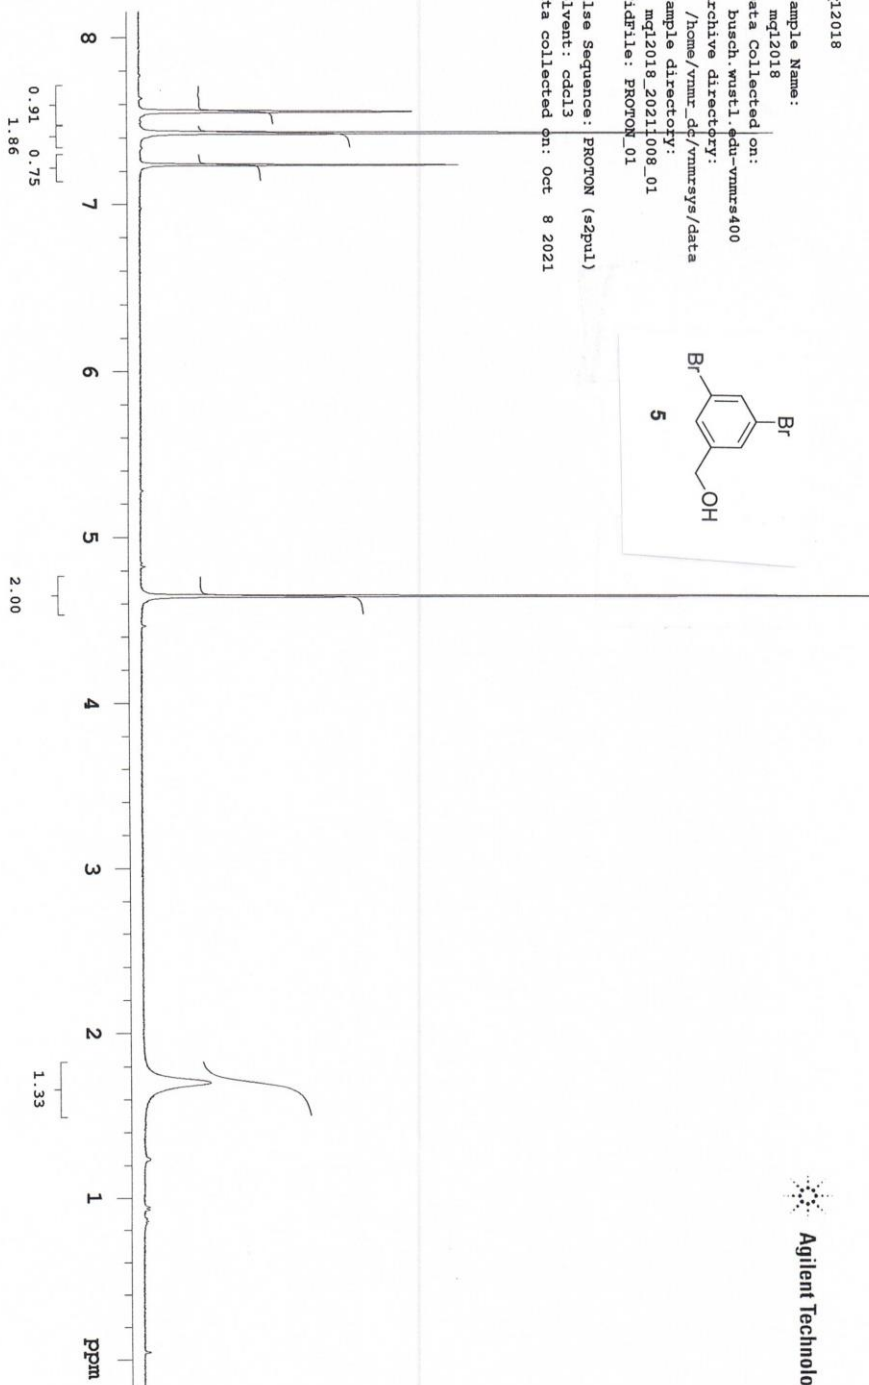

 Agilent Technologies

mq12020

Sample Name:

mq12020

Data Collected on:

busch.wustl.edu-ymms400

Archive directory:

/home/ymr\_dc/ymmsys/data

Sample directory:

mq12020\_20211011\_01

Fidfile: PROTON\_01

Pulse Sequence: PROTON (s2pul)

Solvent: cdcl3

Data collected on: Oct 11 2021

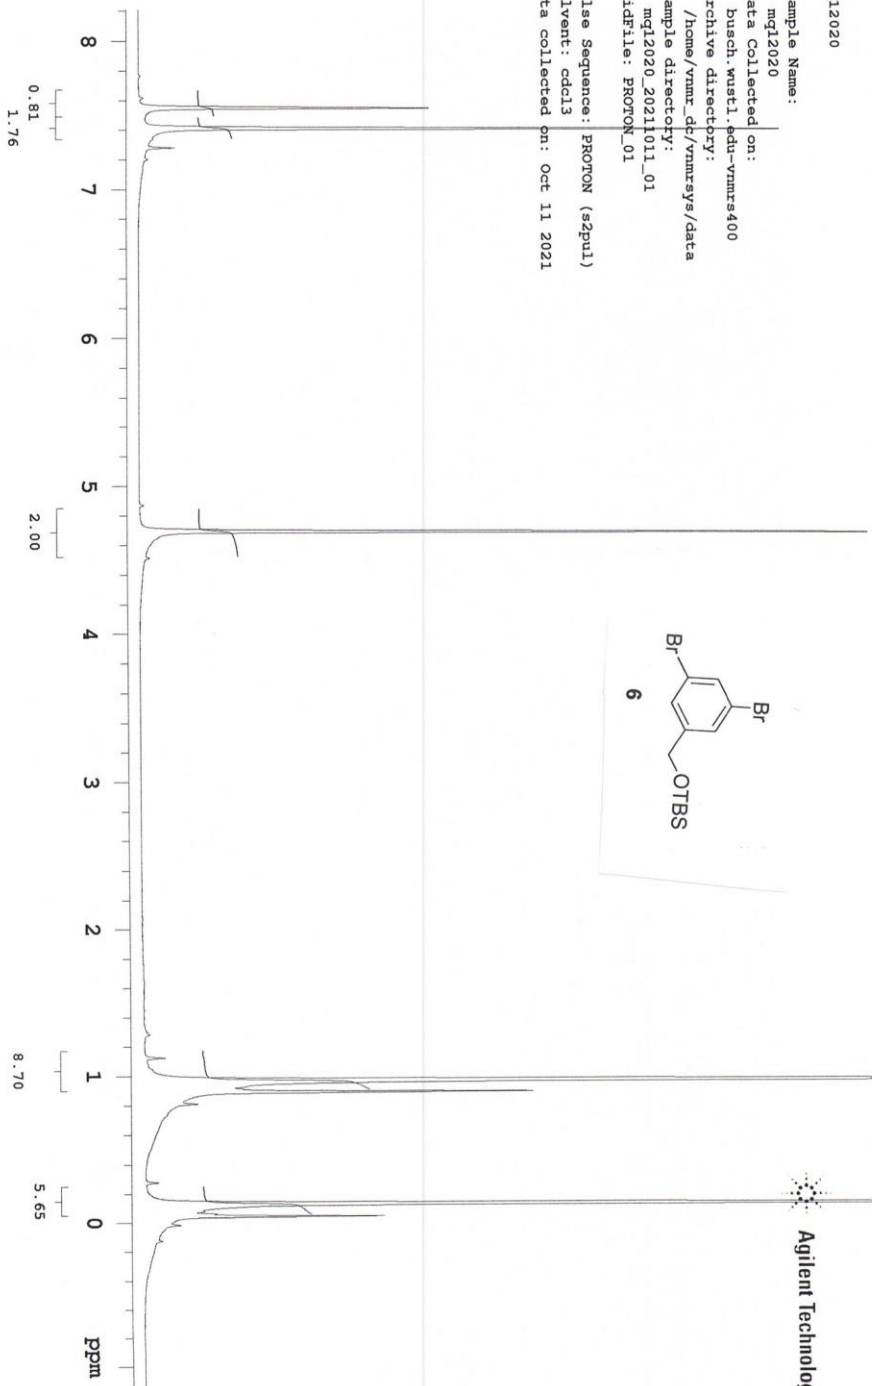



mq12039

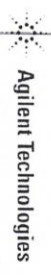

Sample Name: mq12039  
Data Collected on: busch.mustl.edu-vmms400  
Archive directory: /home/vmmr\_dc/vmmrSYS/data  
Sample directory: mq12039\_2021101\_02  
FidFile: PROTON\_01  
Pulse Sequence: PROTON (s2pul)  
Solvent: cdcl3  
Data collected on: Nov 1 2021

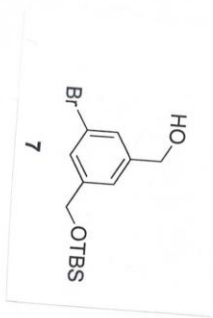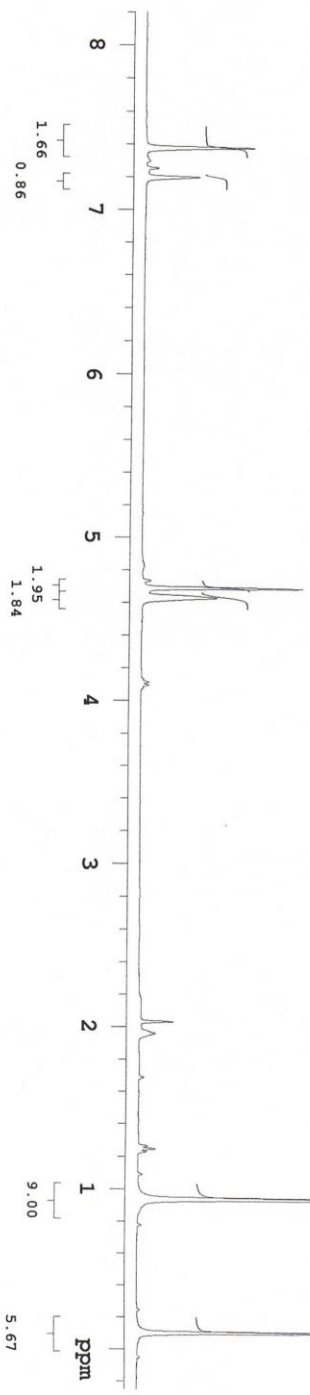

mg12040

Sample Name: mg12040  
Data Collected on: busch.wustl.edu-vnmrs400  
Archive directory: /home/vnmr\_dc/vnmrSYS/data  
Sample directory: mg12040\_20211102\_01  
FidFile: PROTON\_01  
Pulse Sequence: PROTON (szpu1)  
Solvent: cdcl3  
Data collected on: Nov 2 2021

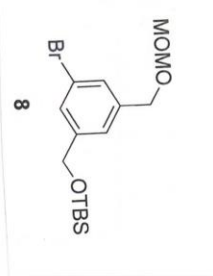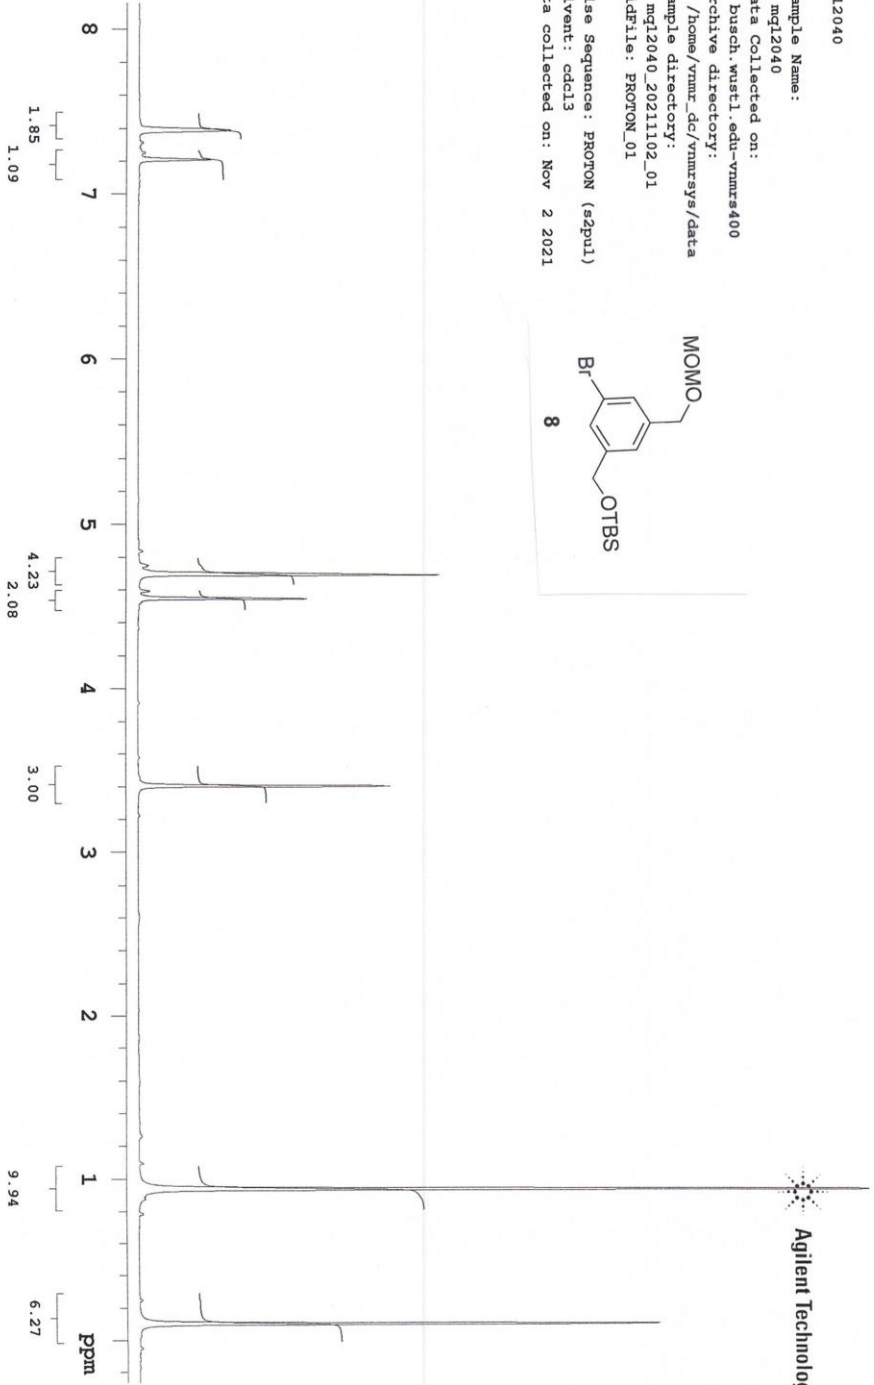

mq12047

Sample Name:  
mq12047-4  
Data Collected on:  
busch.wustl.edu-vmrs400  
Archive directory:  
/home/vmr\_dc/vmrSYS/data  
Sample directory:  
mq12047-4\_2021109\_01  
FidFile: PROTON\_01  
Pulse Sequence: PROTON (s2pu1)  
Solvent: cdcl3  
Data collected on: Nov 9 2021

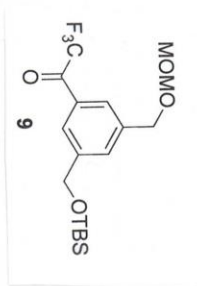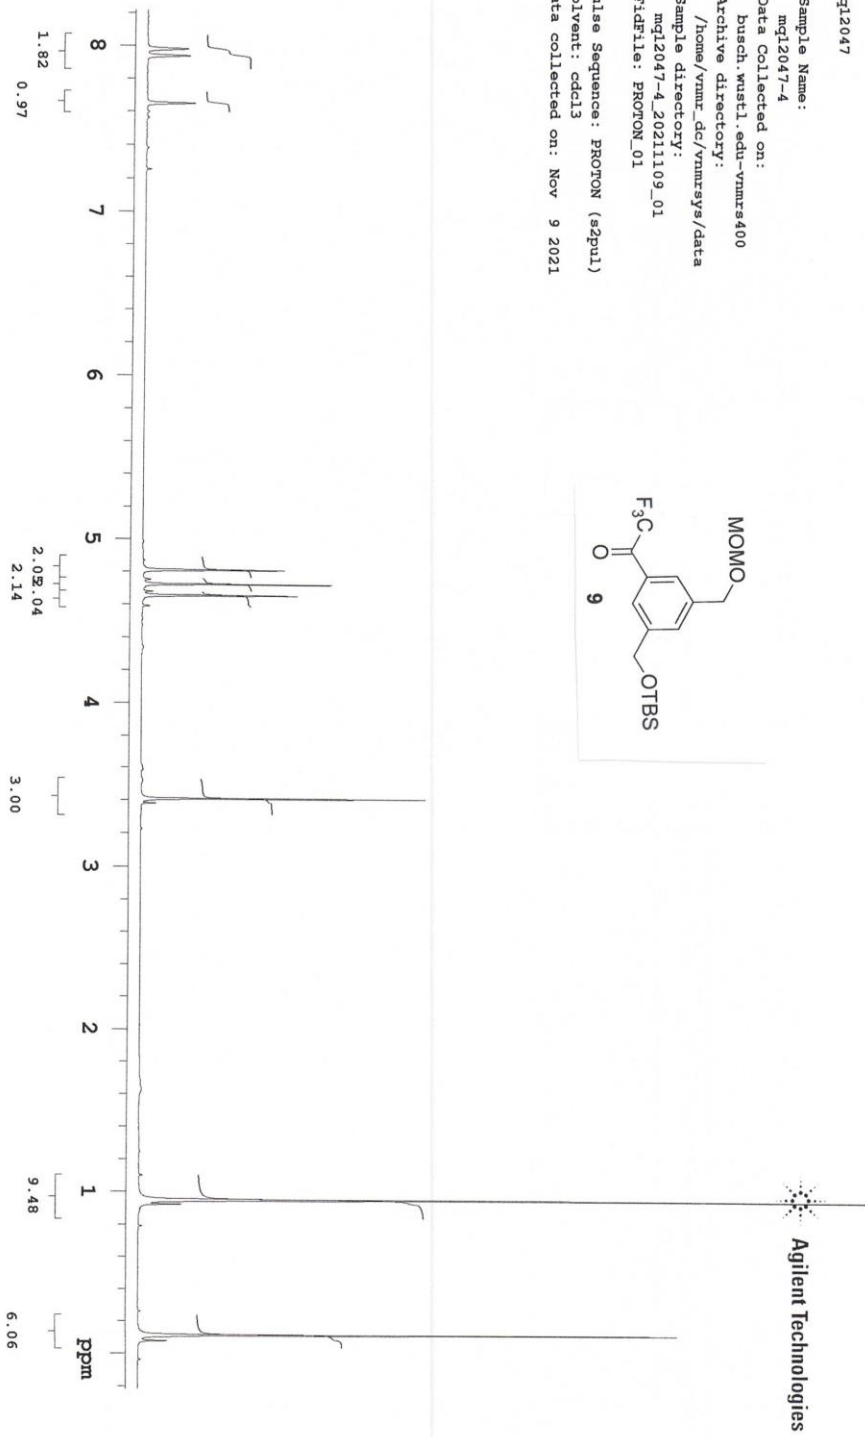

mq12048

Sample Name:

mq12048

Data Collected on:

busch.wustl.edu~vnmr400

Archive directory:

/home/vnmr\_dc/vnmrsys/data

Sample directory:

mq12048\_2021110\_01

FidFile: PROTON\_01

Pulse Sequence: PROTON (szpul)

Solvent: cdcl3

Data collected on: Nov 10 2021

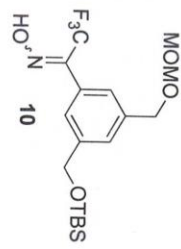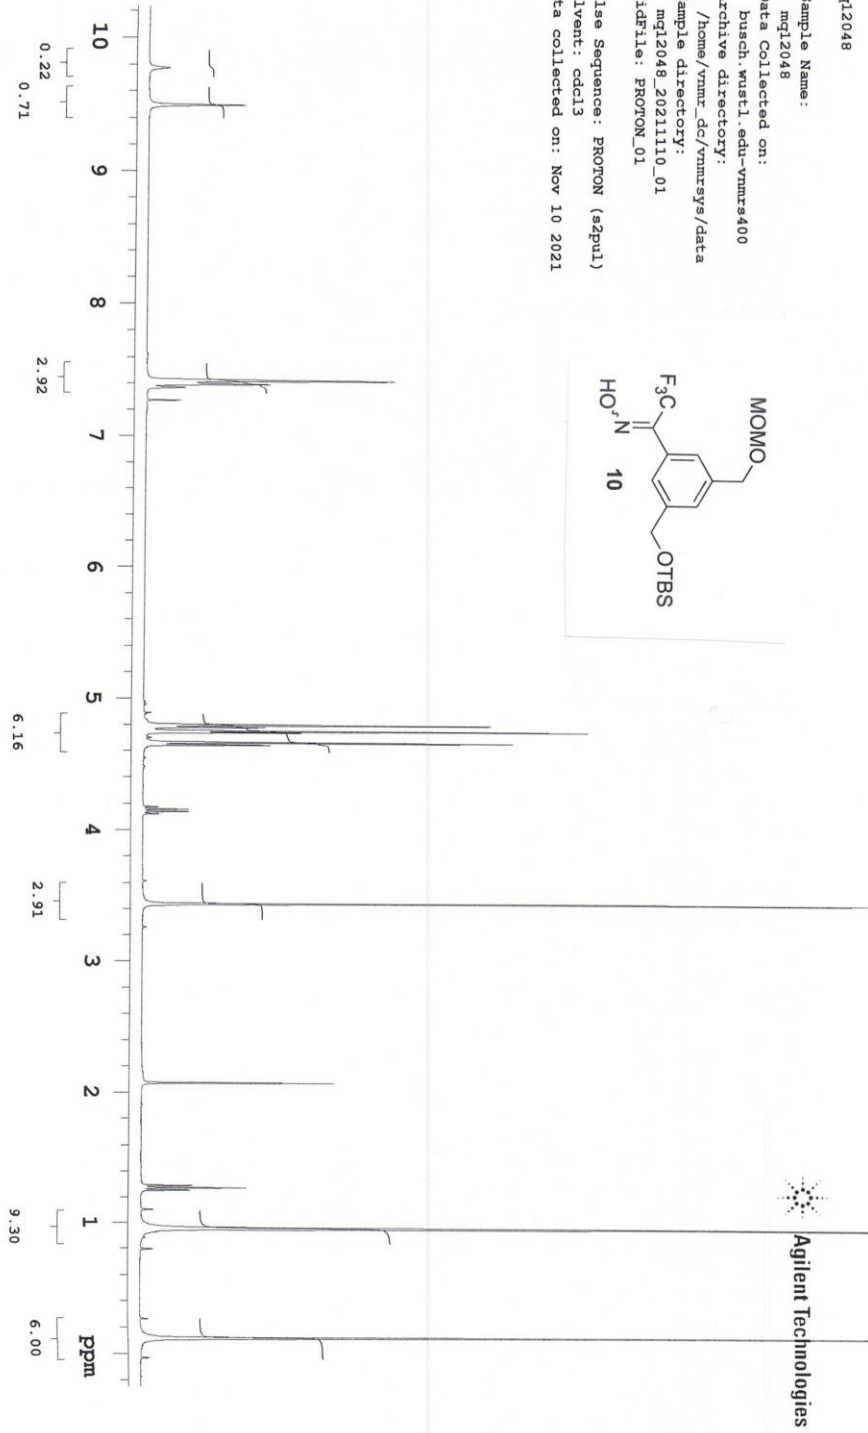

mq12049

Sample Name:  
mq12049  
Data Collected on:  
busch.wustl.edu-vmrs400  
Archive directory:  
/home/vmr\_dc/vmrsys/data  
Sample directory:  
mq12049\_2021110\_01  
FidFile: PROTON\_01  
Pulse Sequence: PROTON (s2pu1)  
Solvent: cdcl3  
Data collected on: Nov 10 2021

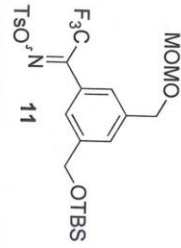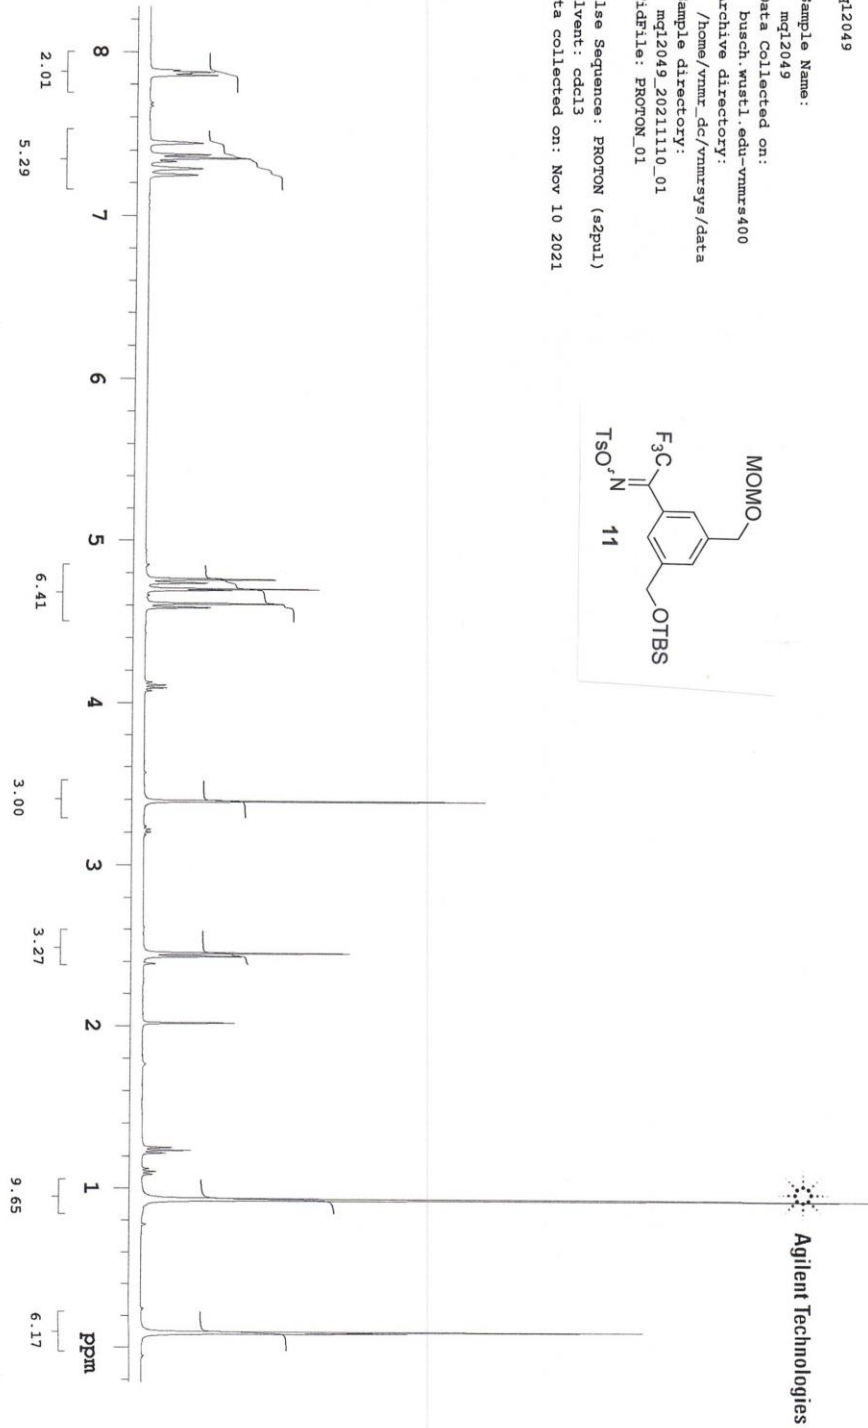

mq12050

Sample Name:

mq12050

Data Collected on:

busch.wustl.edu-vmrs400

Archive directory:

/home/vmr\_dc/vmrsys/data

Sample directory:

mq12050\_2021111\_01

FidFile: PROTON\_01

Pulse Sequence: PROTON (s2pul)

Solvent: cdcl3

Data collected on: Nov 11 2021

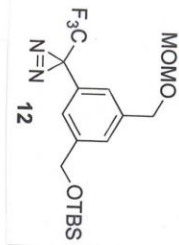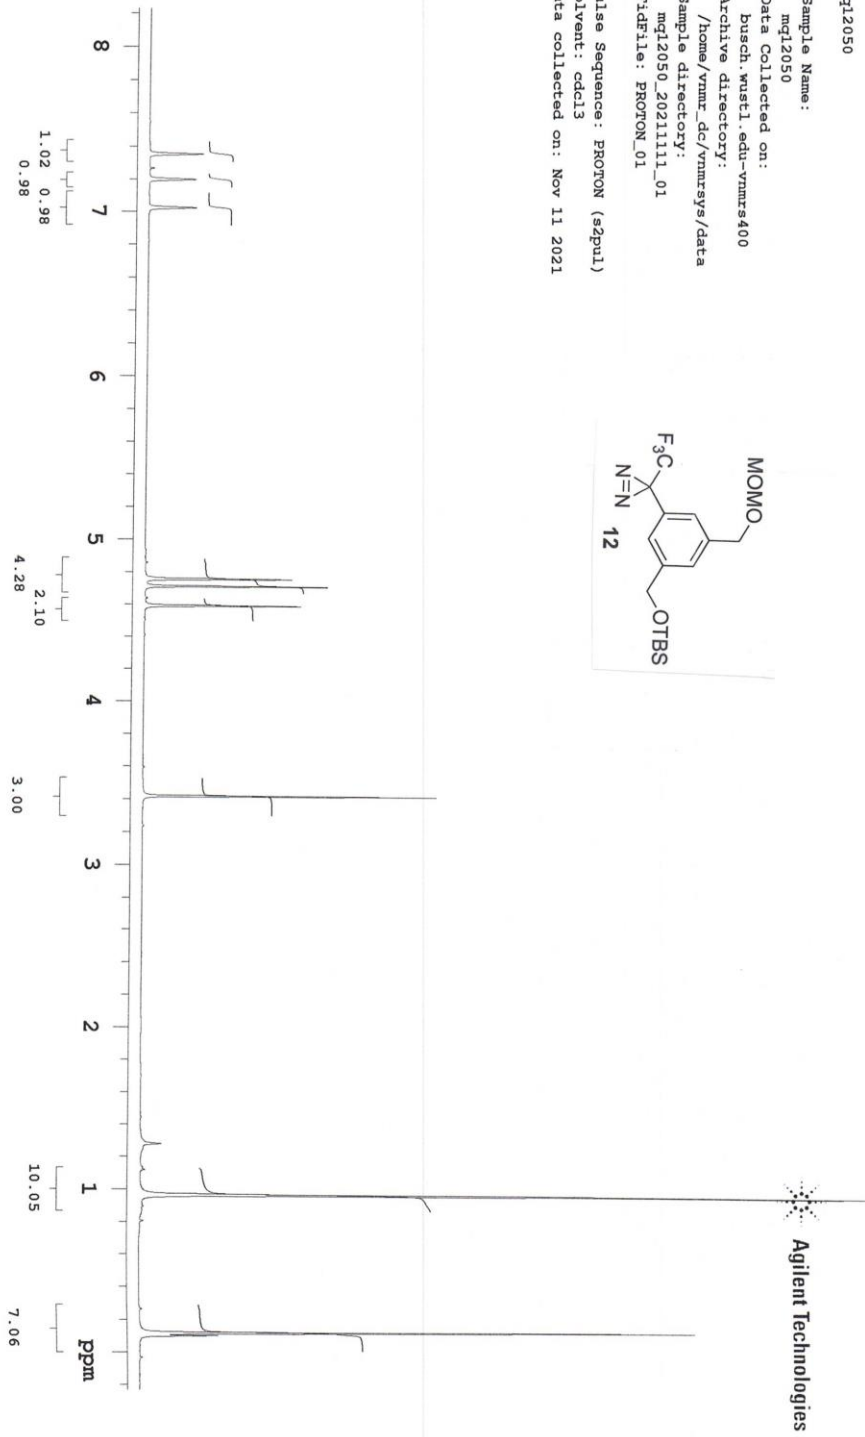

mq12051

Sample Name:  
mq12051  
Data Collected on:  
busch.wustl.edu-vmwr400  
Archive directory:  
/home/vmwr\_dc/vmwrsys/data  
Sample directory:  
mq12051\_2021112\_01  
FIDFile: PROTON\_01  
Pulse Sequence: PROTON (szpul)  
Solvent: cdcl3  
Data collected on: Nov 12 2021

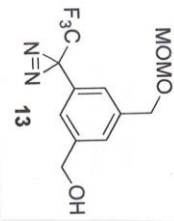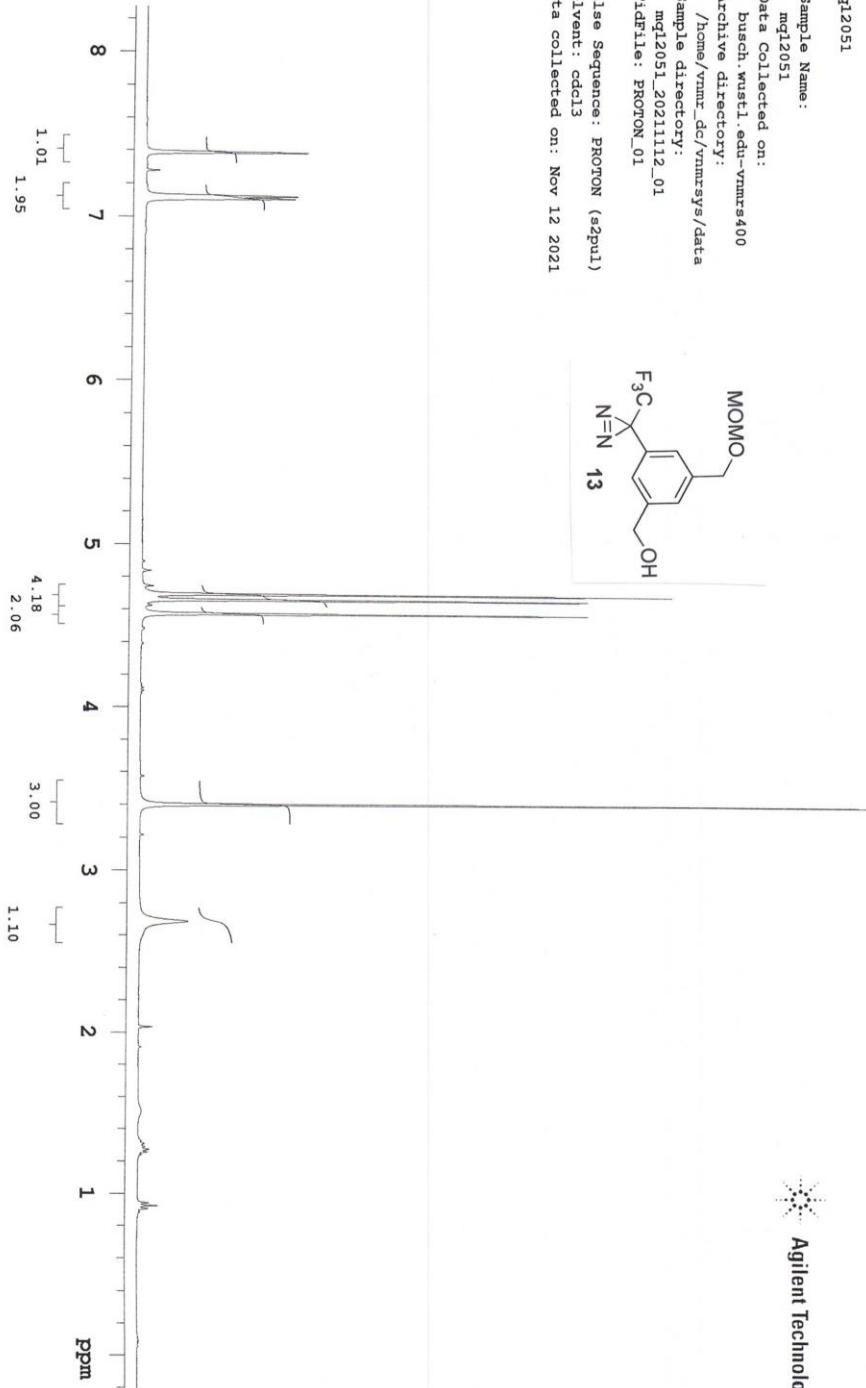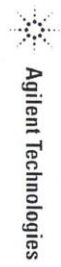

mg12053

Sample Name:

mg12053-2

Data Collected on:

busch.wustl.edu~vnmrs400

Archive directory:

/home/vnmr\_dc/vnmrsys/data

Sample directory:

mg12053-2\_20211117\_02

File: PROTON\_01

Pulse Sequence: PROTON (s2pul)

Solvent: cdcl3

Data collected on: Nov 17 2021

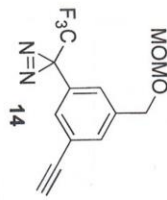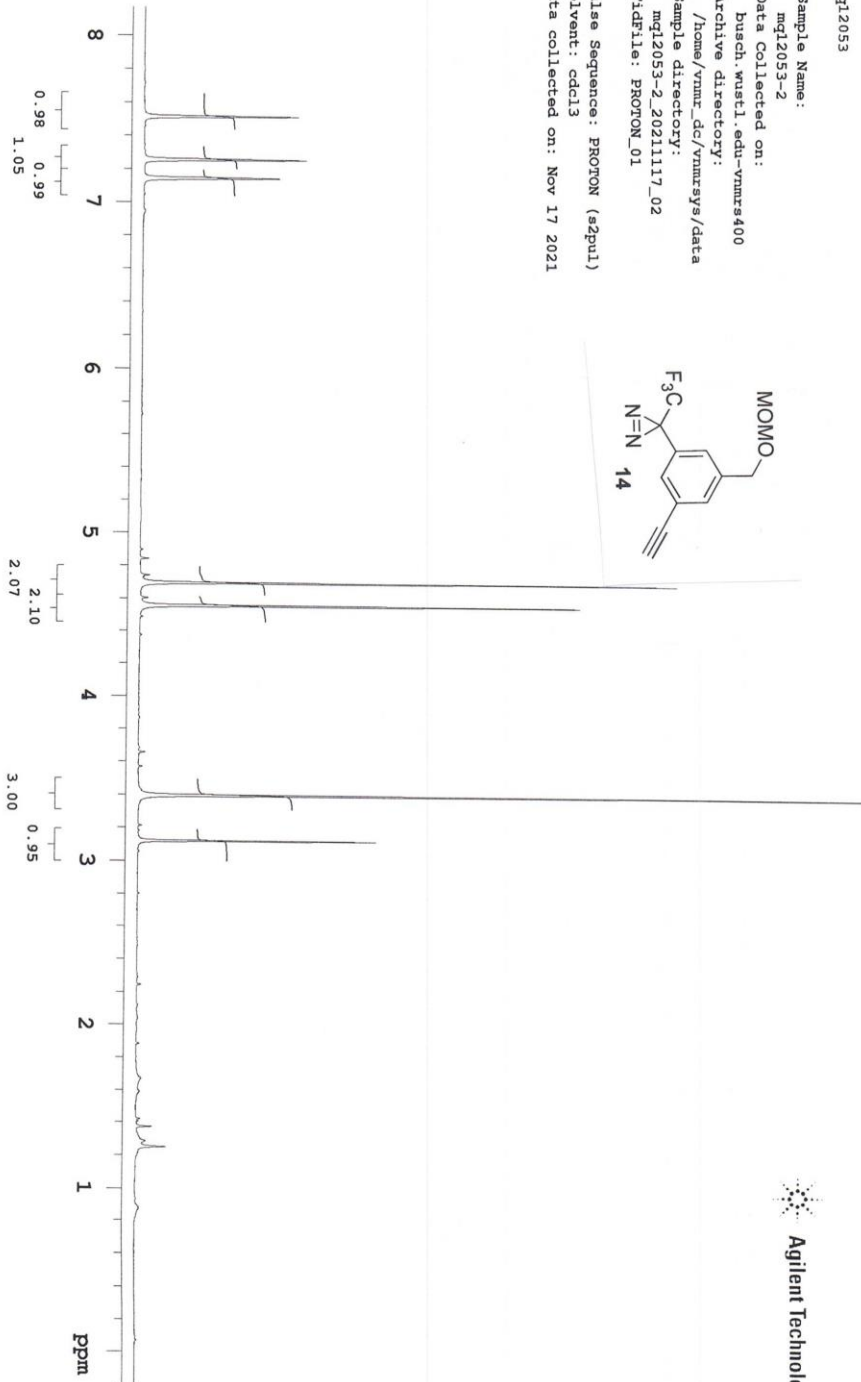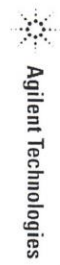



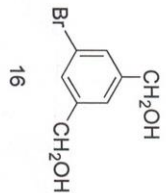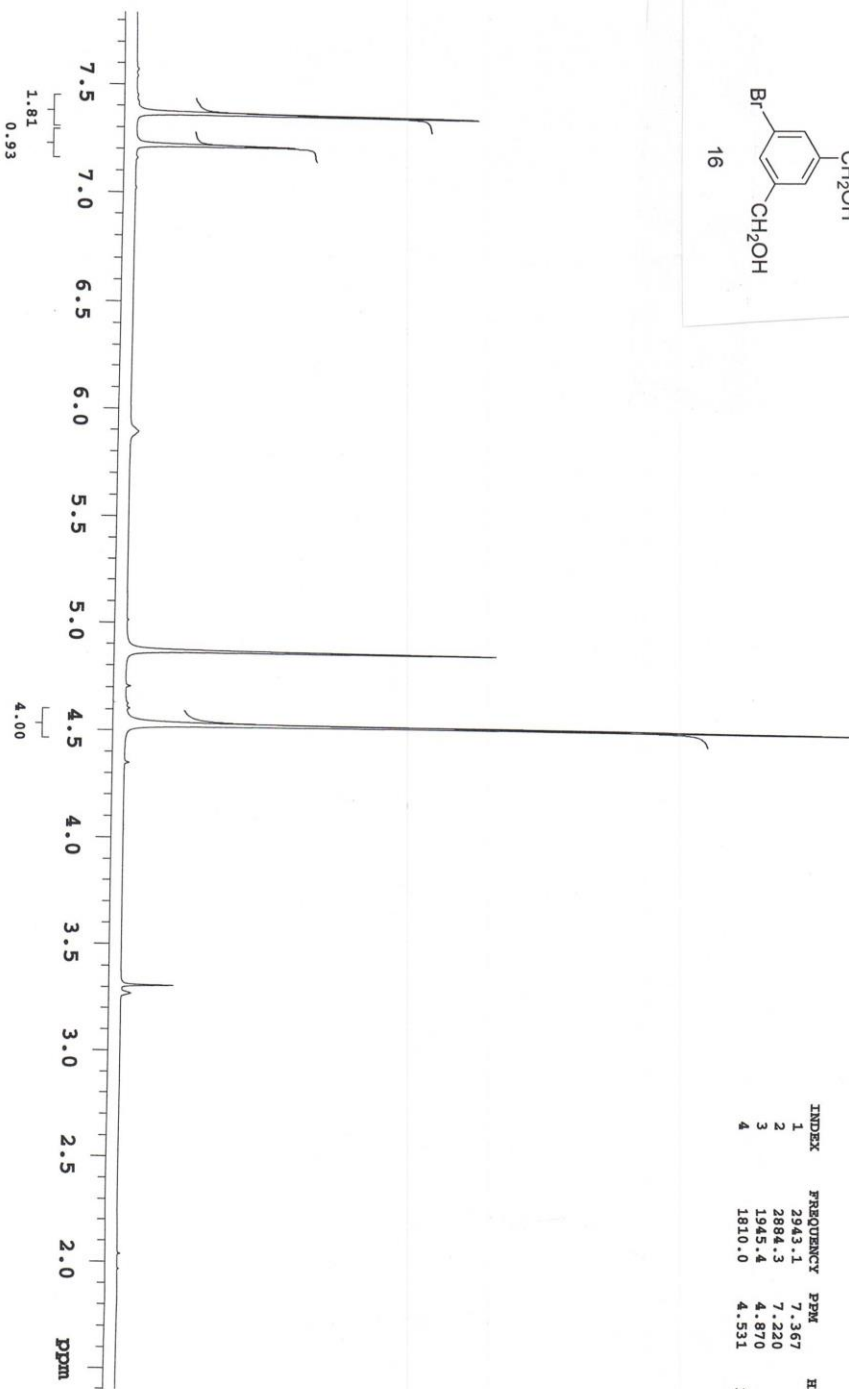

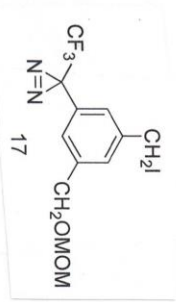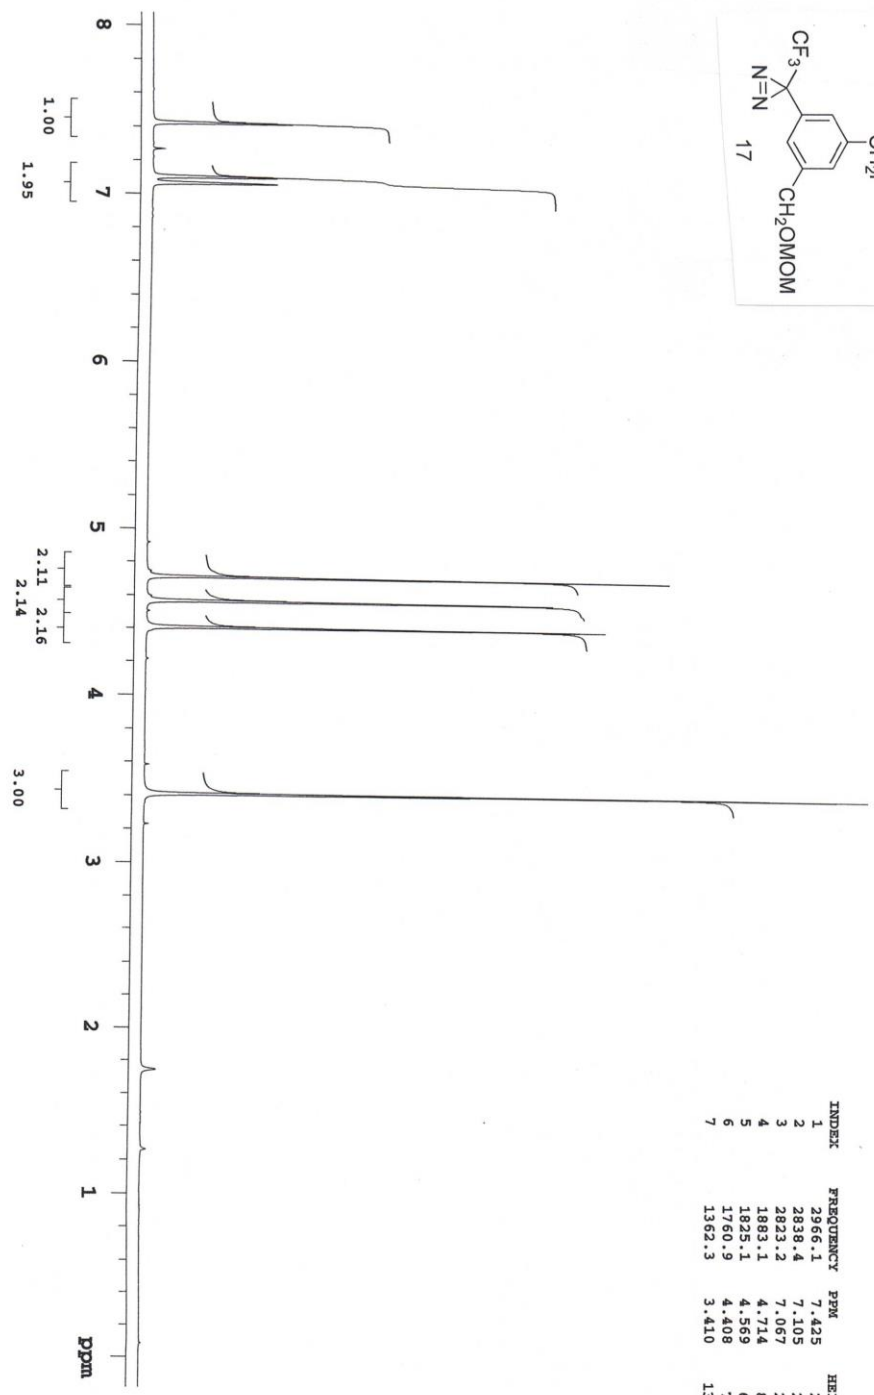

| INDEX | FREQUENCY | PPM   | HEIGHT |
|-------|-----------|-------|--------|
| 1     | 2966.1    | 7.425 | 23.8   |
| 2     | 2838.4    | 7.105 | 21.2   |
| 3     | 2823.2    | 7.067 | 21.2   |
| 4     | 1883.1    | 4.714 | 88.8   |
| 5     | 1825.1    | 4.569 | 89.0   |
| 6     | 1760.9    | 4.408 | 78.0   |
| 7     | 1362.3    | 3.410 | 132.3  |

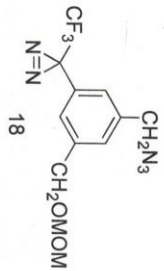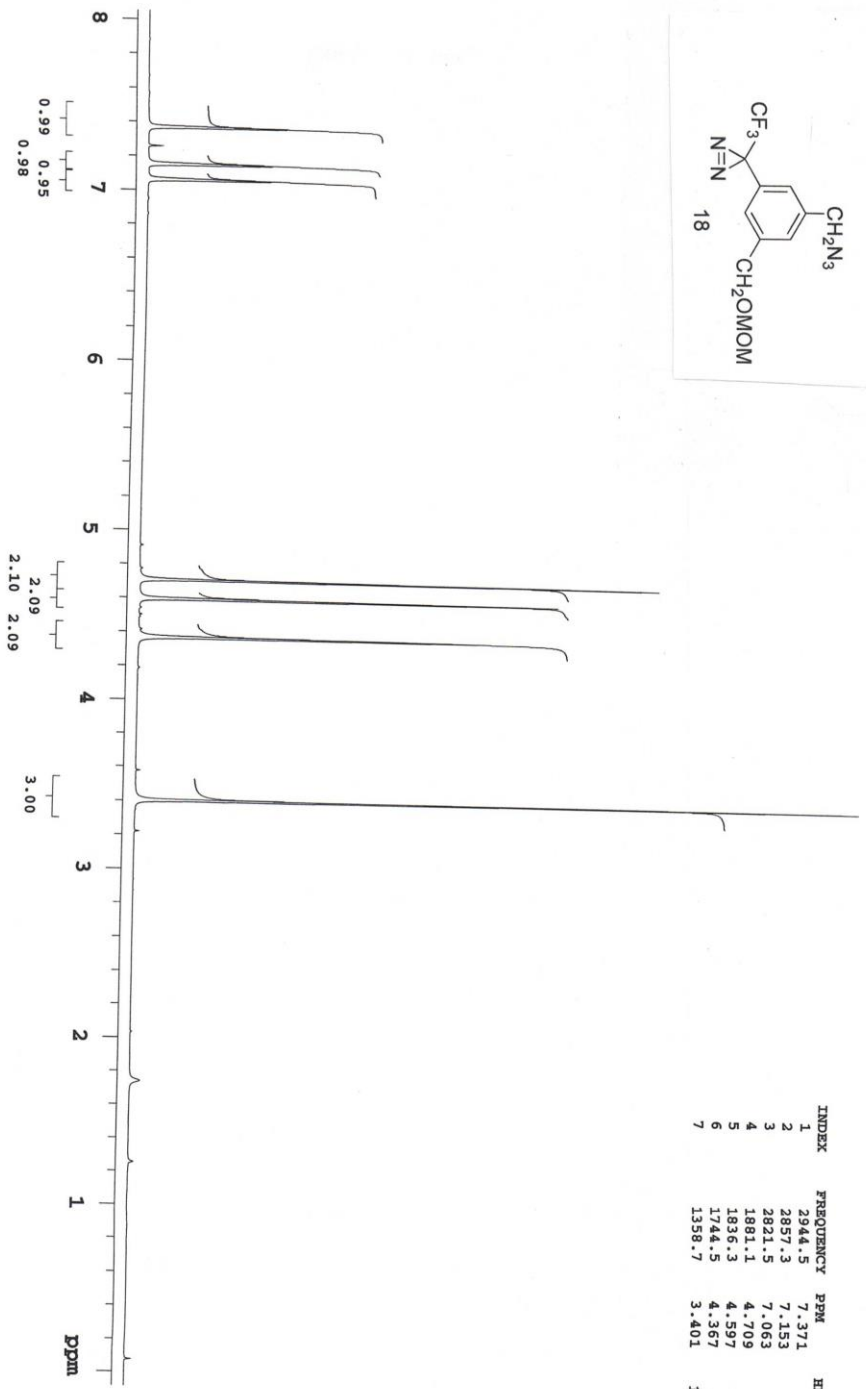

mq13148

Sample Name:  
mq13148  
Data Collected on:  
busch.wustl.edu-ymmr5400  
Archive directory:  
/home/ymmr\_dc/ymmr5ys/data  
Sample directory:  
mq13148\_20230523\_01  
FIDFile: PROTON\_01

Pulse Sequence: PROTON (s2pu1)  
Solvent: cdcl3  
Data collected on: May 23 2023

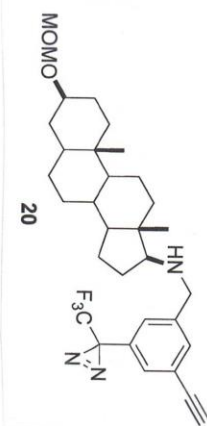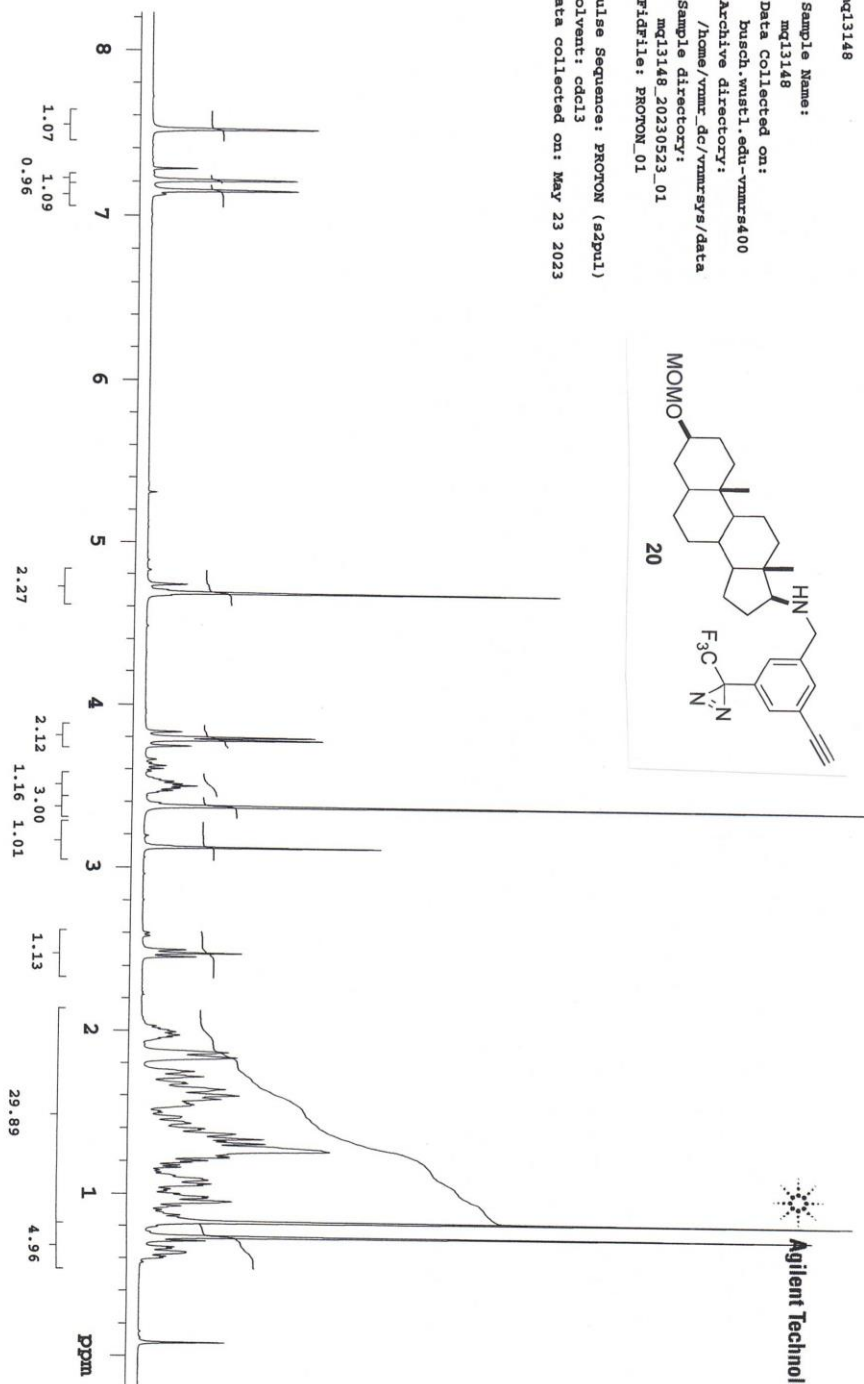

Agilent Technologies

mq13149

Sample Name:  
mq13149  
Data Collected on:  
busch.wustl.edu--vnmr400  
Archive directory:  
/home/vnmr\_dc/vnmr400/data  
Sample directory:  
mq13149\_20230524\_01  
FIDFile: PROTON\_01  
Pulse Sequence: PROTON (zgpg30)  
Solvent: cdcl3  
Data collected on: May 24 2023

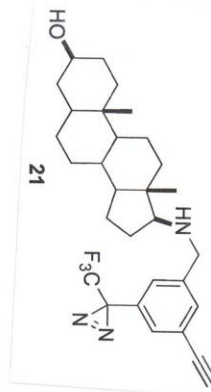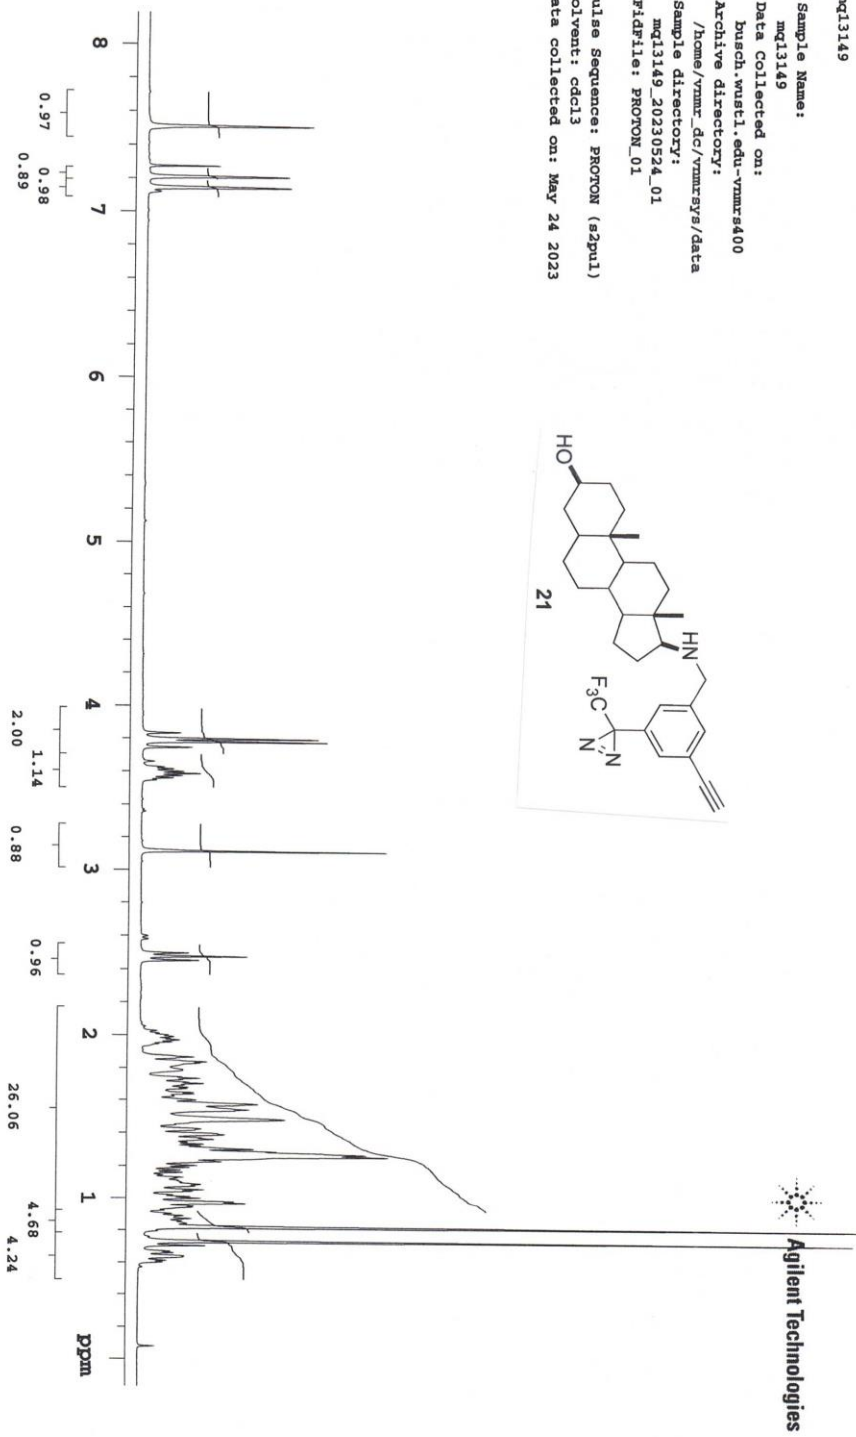

mq13108

Agilent Technologies

Sample Name:  
mq13108  
Data Collected on:  
busch.waschl.edu-vnmrs400  
Archive directory:  
/home/vnmr\_dc/vnmrsgs/data  
Sample directory:  
mq13108\_20230324\_01  
FIDFile: PROTON\_01  
Pulse Sequence: PROTON (s2pul)  
Solvent: cdcl3  
Data collected on: Mar 24 2023

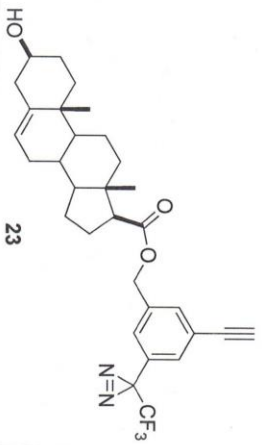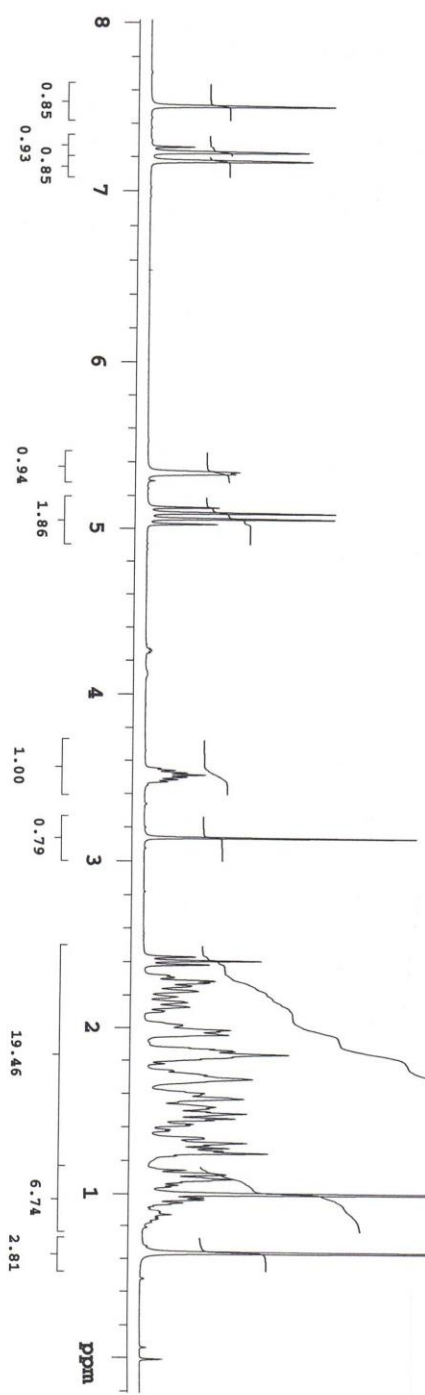

mq13154

Sample Name: mq13154  
Data Collected on: shere.wustl.edu-inoxa300  
Archive directory: /home/vdc\_dc/vnmr/sys/data  
Sample directory: mq13154\_20230602\_01  
FidFile: PROTON\_01  
Pulse Sequence: PROTON (s2pu1)  
Solvent: cdcl3  
Data collected on: Jun 2 2023

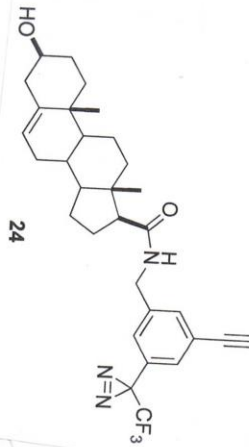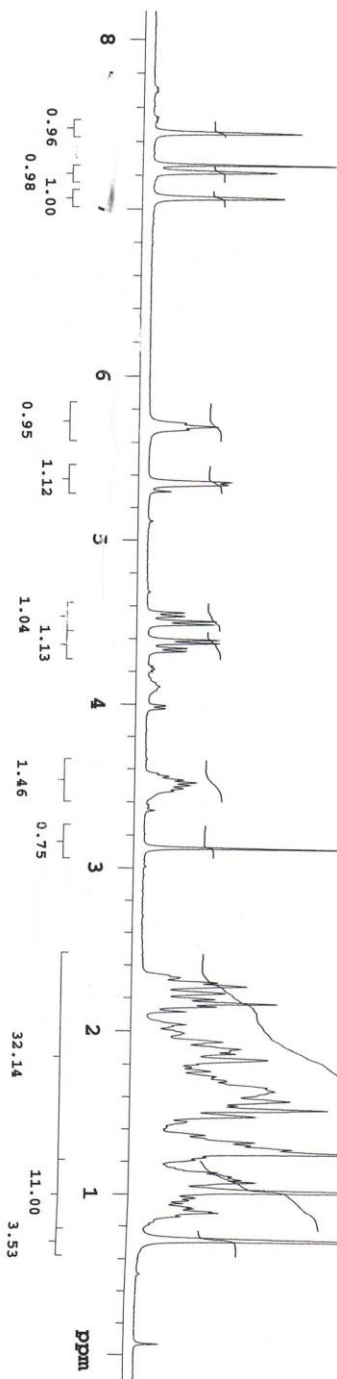

Agilent Technologies

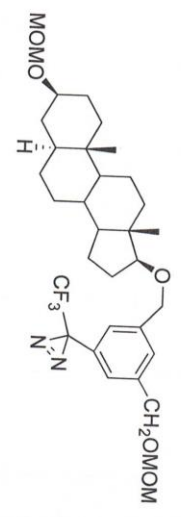

26

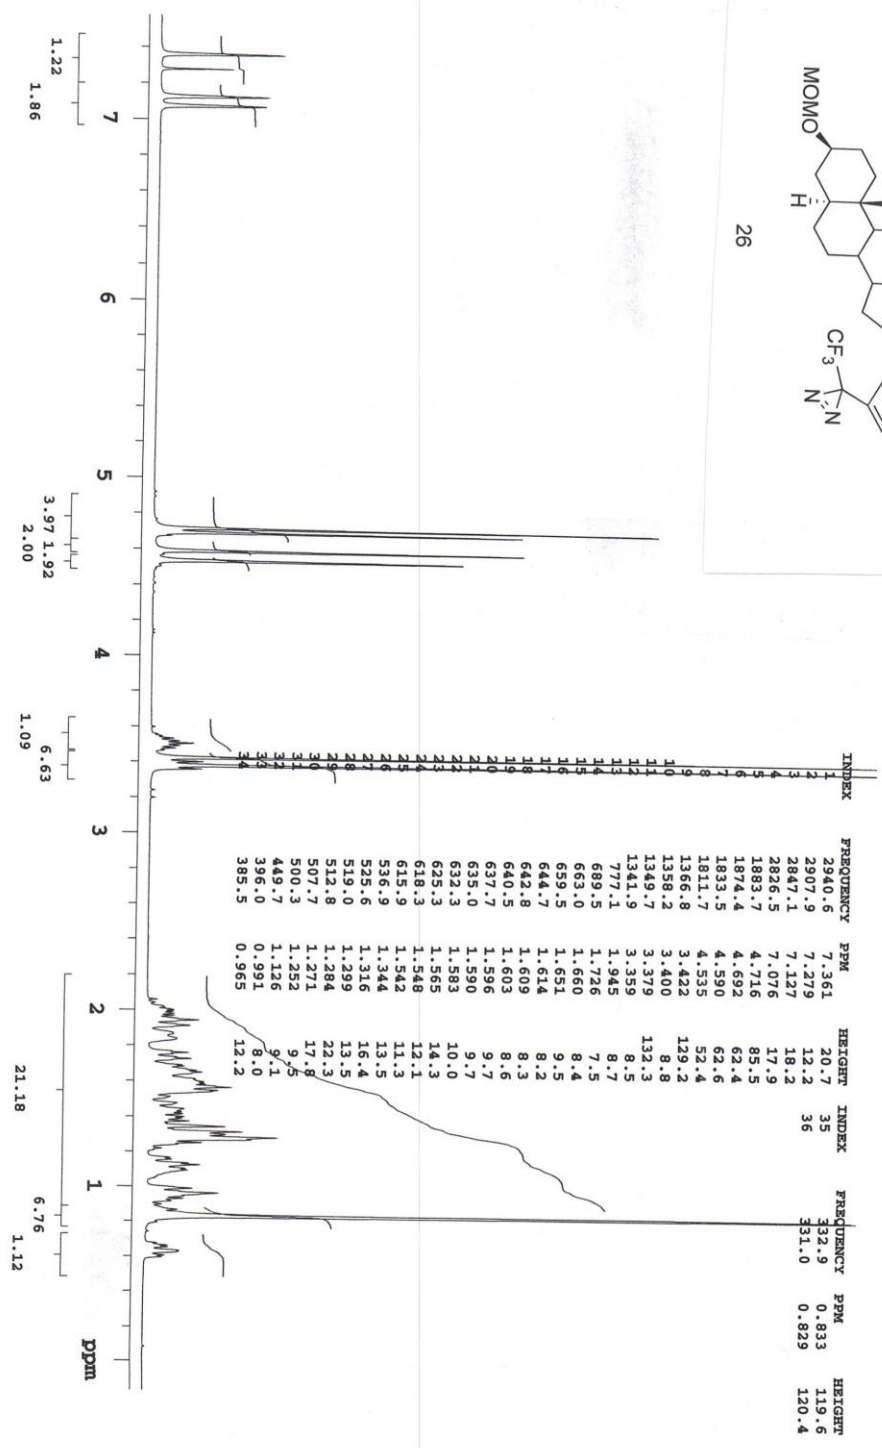



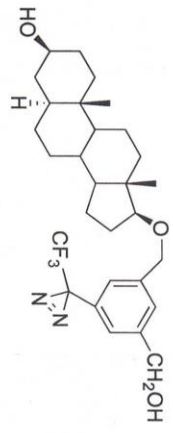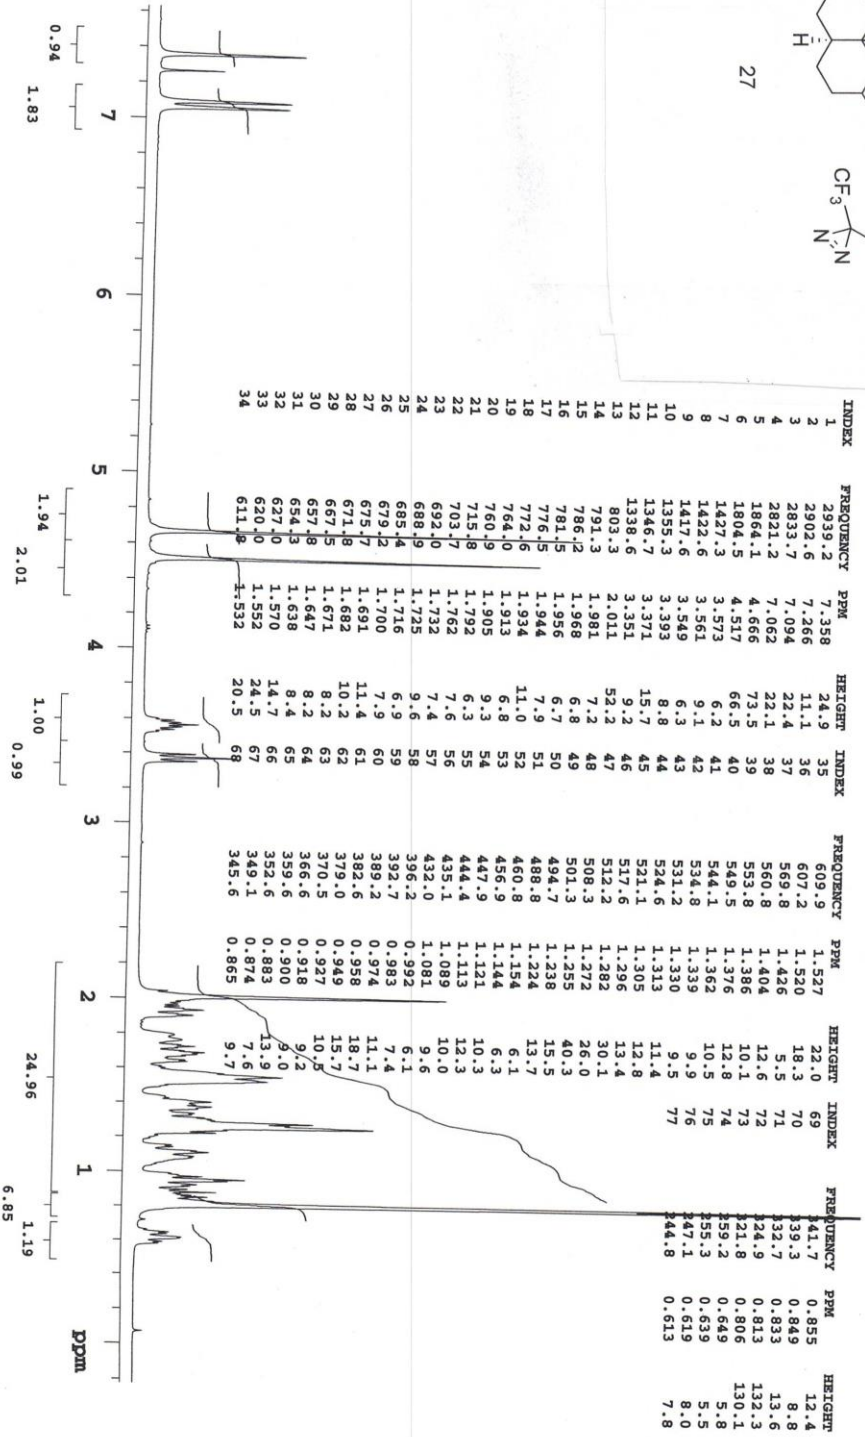

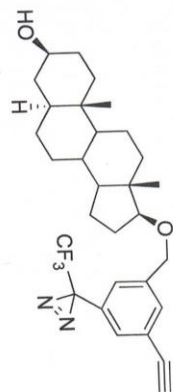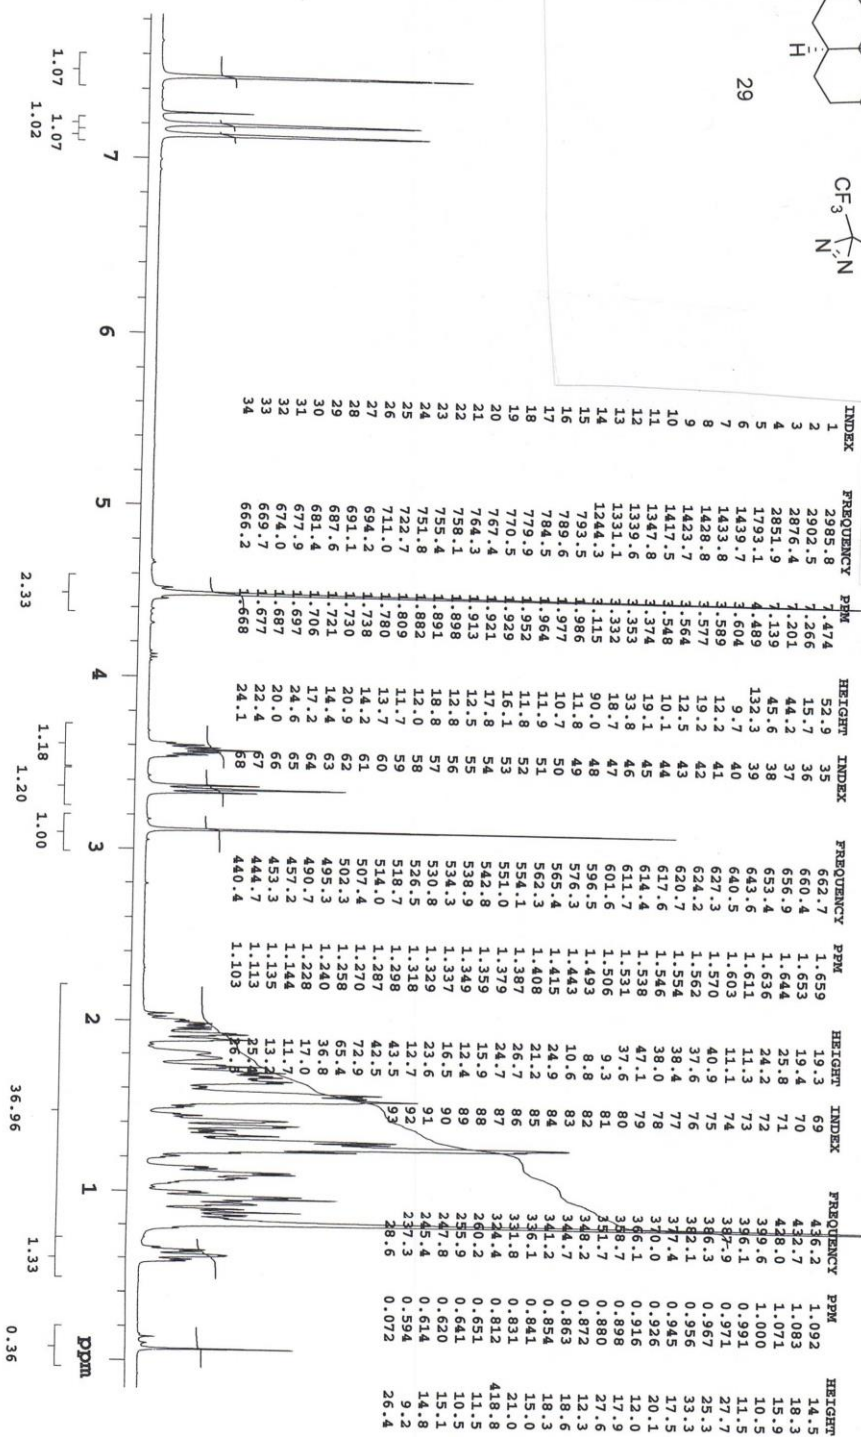

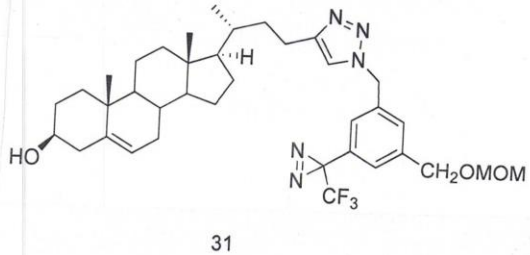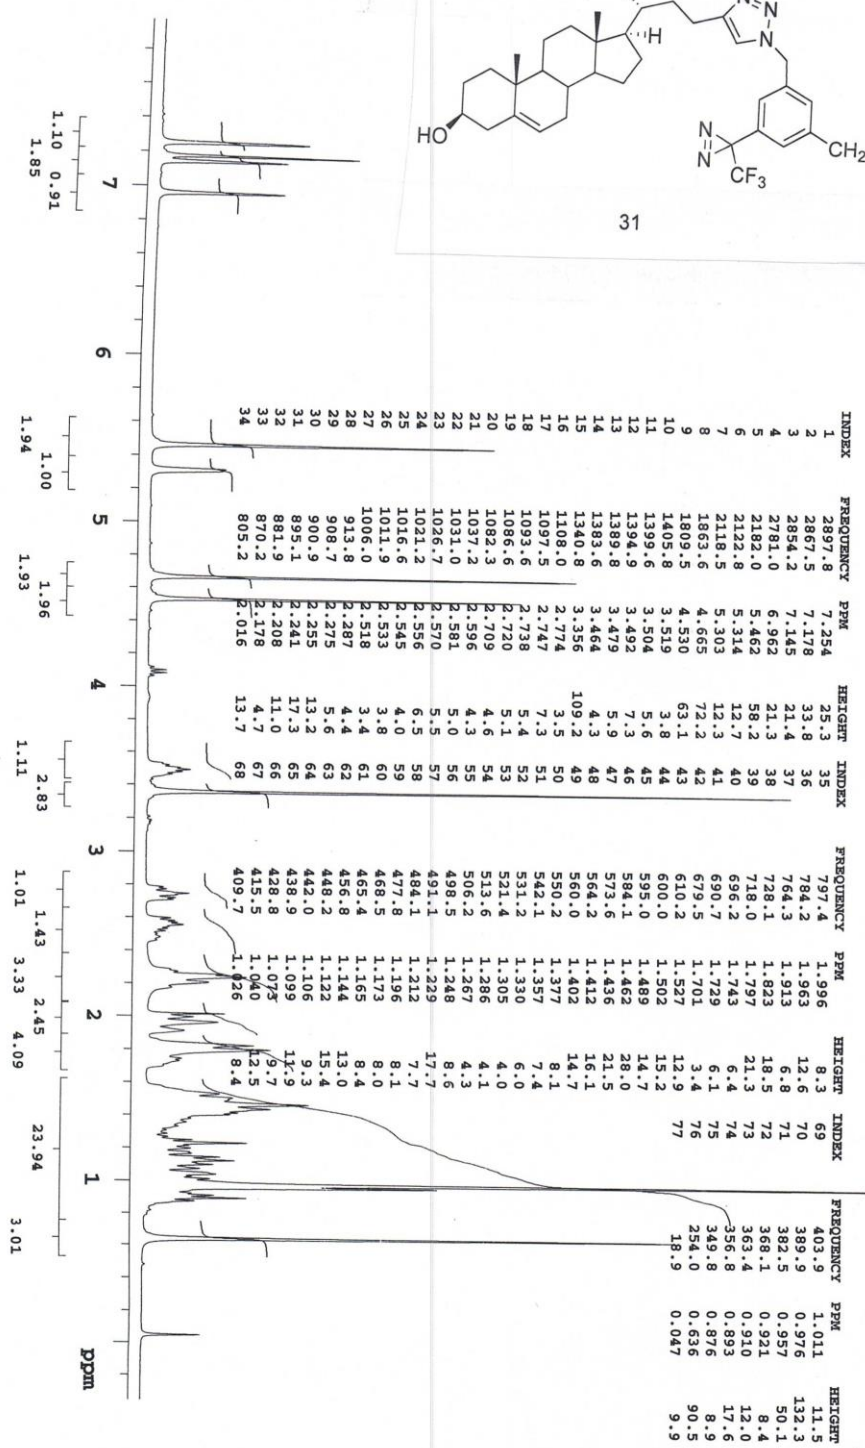

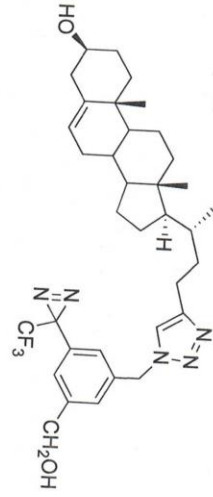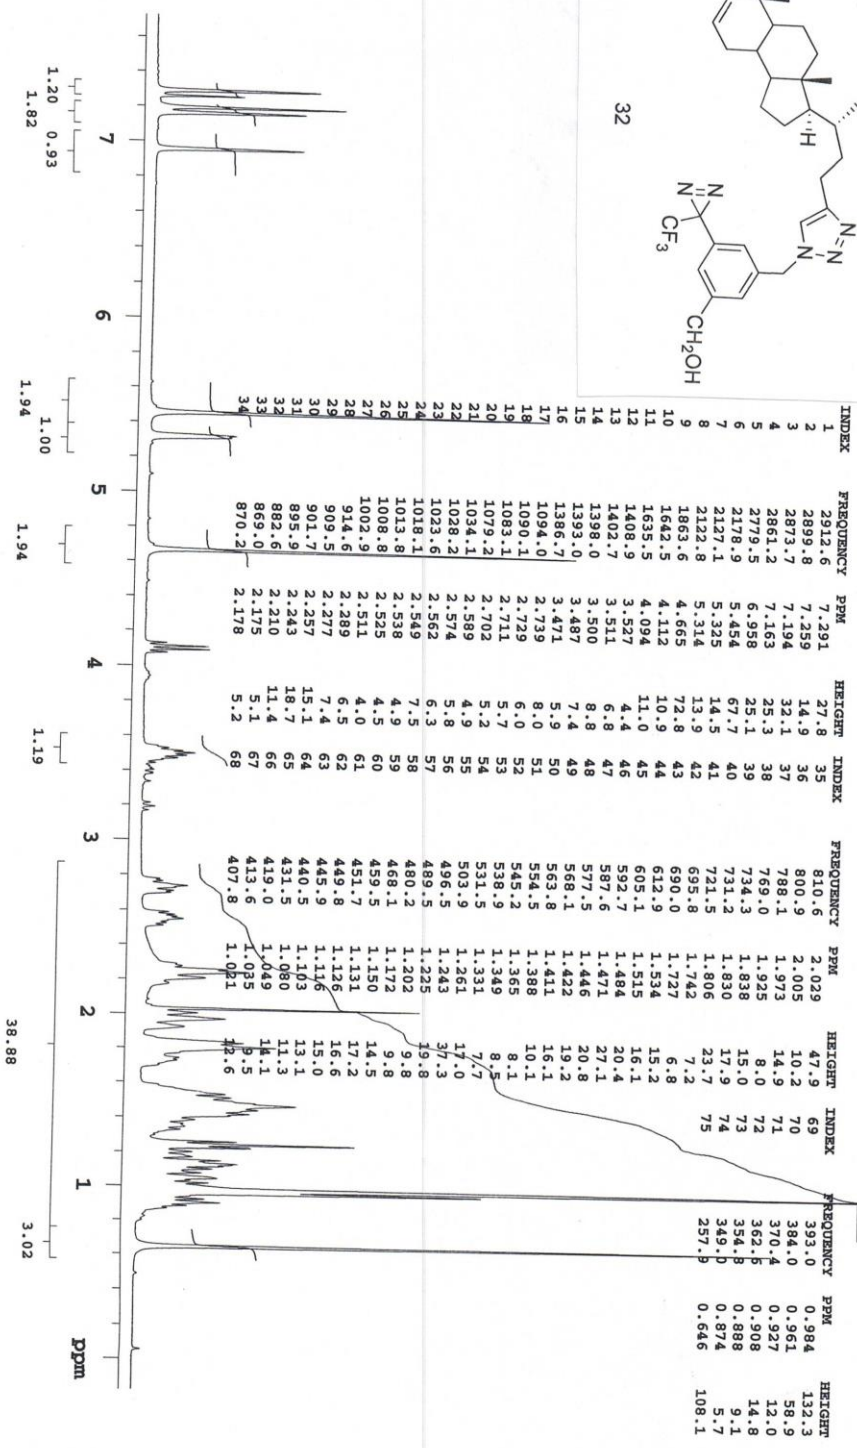

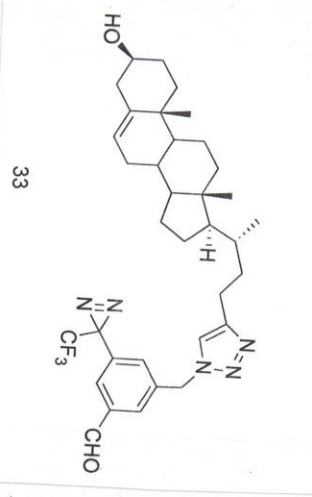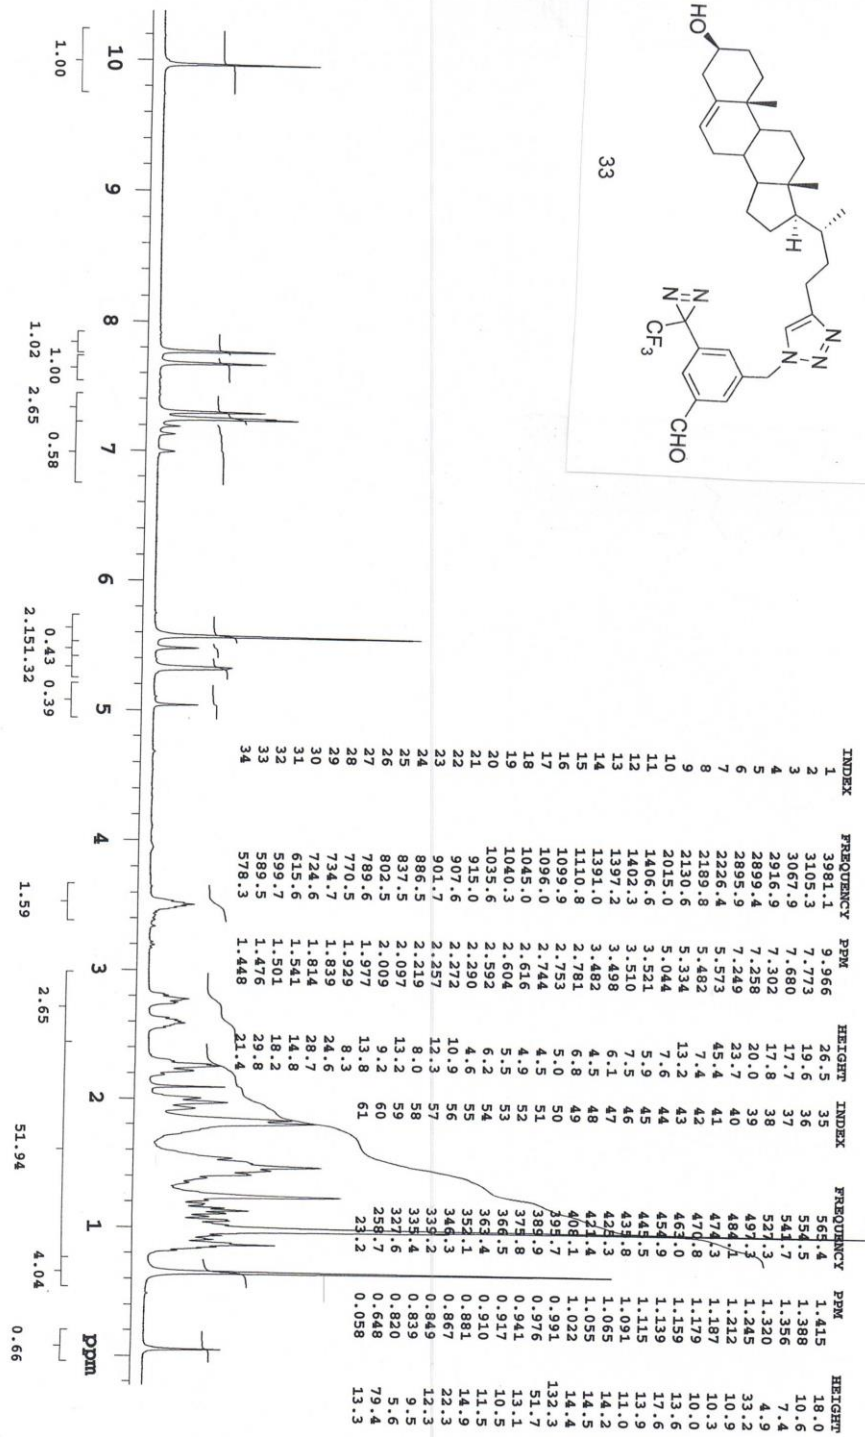

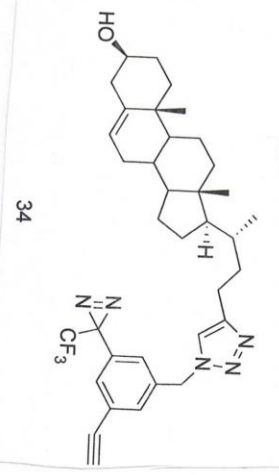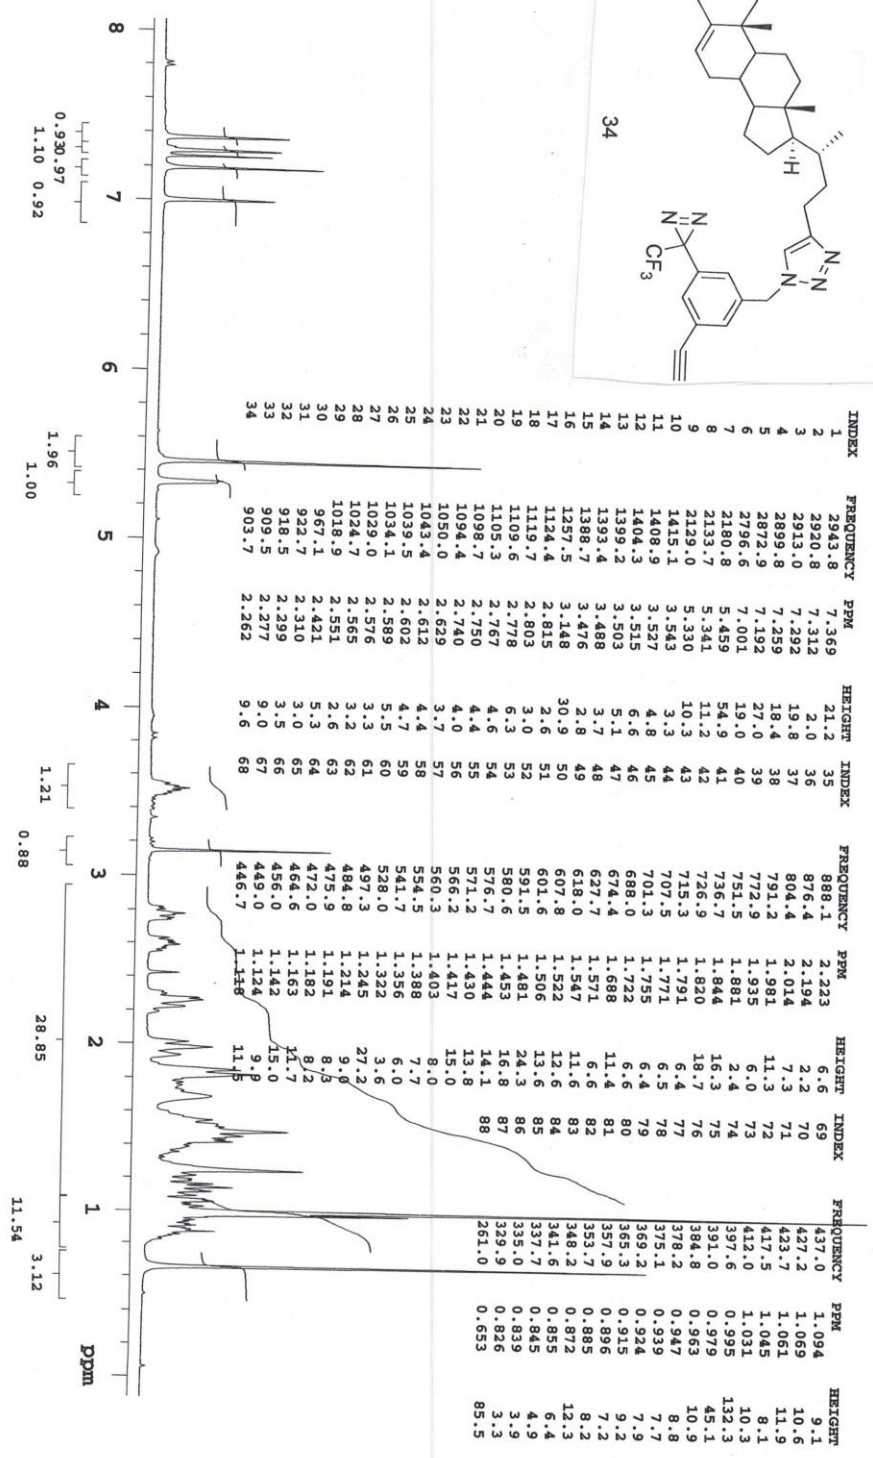

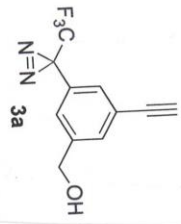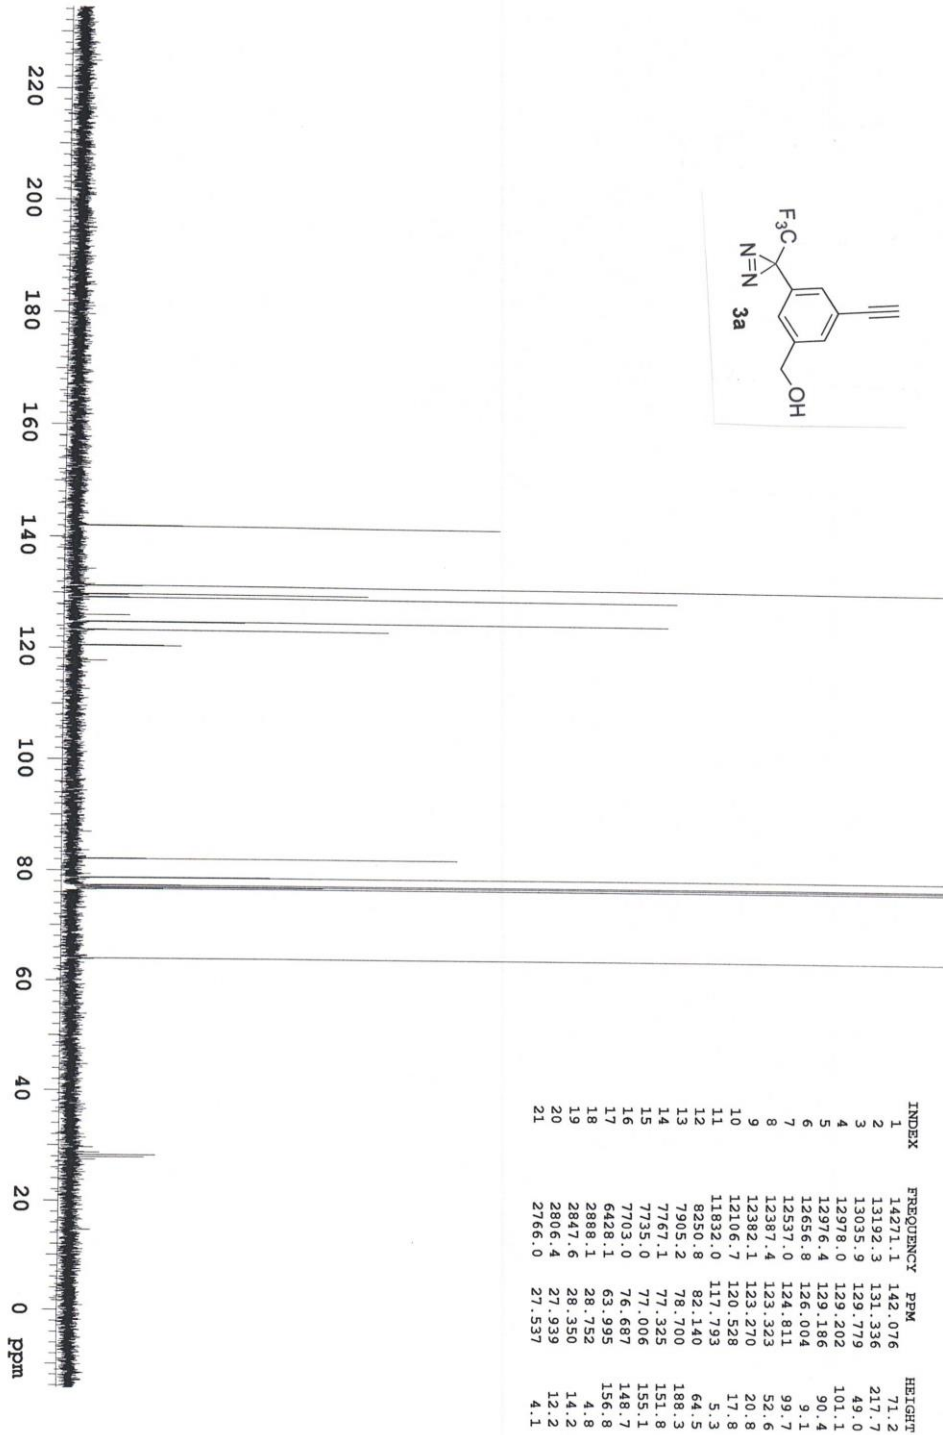

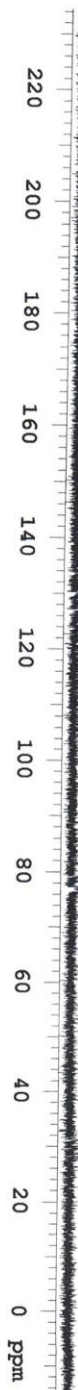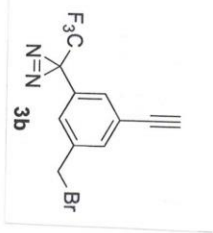

| INDEX | FREQUENCY | PPM     | HEIGHT |
|-------|-----------|---------|--------|
| 1     | 13973.8   | 139.115 | 60.4   |
| 2     | 13428.3   | 133.685 | 56.9   |
| 3     | 13078.1   | 130.198 | 46.7   |
| 4     | 13049.8   | 129.917 | 51.3   |
| 5     | 12765.3   | 127.084 | 56.7   |
| 6     | 12435.7   | 123.803 | 51.1   |
| 7     | 12371.6   | 123.165 | 14.4   |
| 8     | 12096.9   | 120.431 | 18.5   |
| 9     | 11822.3   | 117.696 | 6.2    |
| 10    | 8200.6    | 81.641  | 40.4   |
| 11    | 7958.0    | 79.225  | 99.9   |
| 12    | 7766.5    | 77.319  | 87.3   |
| 13    | 7734.4    | 77.000  | 87.0   |
| 14    | 7703.2    | 76.689  | 84.2   |
| 15    | 3136.2    | 31.222  | 106.4  |
| 16    | 2982.1    | 29.688  | 5.5    |
| 17    | 2835.6    | 28.230  | 10.7   |
| 18    | 2795.2    | 27.827  | 11.9   |



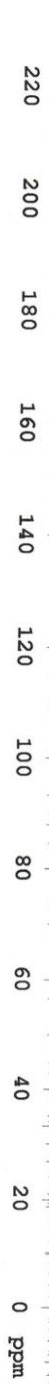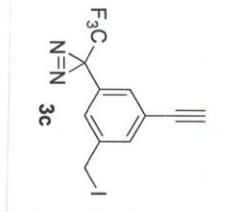

| INDEX | FREQUENCY | PPM     | HEIGHT |
|-------|-----------|---------|--------|
| 1     | 14278.8   | 142.152 | 48.9   |
| 2     | 13991.9   | 139.296 | 55.5   |
| 3     | 13019.9   | 129.619 | 56.7   |
| 4     | 12773.5   | 127.166 | 106.7  |
| 5     | 12673.5   | 126.171 | 7.7    |
| 6     | 12527.8   | 124.720 | 83.8   |
| 7     | 12451.5   | 123.961 | 85.2   |
| 8     | 12398.9   | 123.437 | 26.3   |
| 9     | 12124.2   | 120.702 | 21.2   |
| 10    | 11849.6   | 117.968 | 8.1    |
| 11    | 9637.0    | 95.941  | 27.1   |
| 12    | 9634.8    | 95.919  | 84.5   |
| 13    | 7768.6    | 77.340  | 83.3   |
| 14    | 7736.6    | 77.021  | 84.8   |
| 15    | 7704.5    | 76.702  | 84.6   |
| 16    | 6882.8    | 68.522  | 108.6  |
| 17    | 6464.7    | 64.560  | 58.3   |
| 18    | 5569.0    | 55.443  | 46.6   |
| 19    | 5566.8    | 55.420  | 40.3   |
| 20    | 2872.1    | 28.593  | 11.0   |
| 21    | 2831.6    | 28.190  | 11.8   |

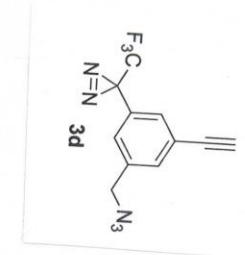

| INDEX | FREQUENCY | PPM     | HEIGHT |
|-------|-----------|---------|--------|
| 1     | 13758.6   | 136.973 | 32.1   |
| 2     | 13310.0   | 132.507 | 83.8   |
| 3     | 13077.3   | 130.190 | 31.6   |
| 4     | 13036.8   | 129.788 | 54.7   |
| 5     | 12653.1   | 125.967 | 56.3   |
| 6     | 12433.3   | 123.780 | 29.1   |
| 7     | 12372.3   | 123.172 | 9.5    |
| 8     | 12097.7   | 120.438 | 9.5    |
| 9     | 8207.4    | 81.709  | 39.1   |
| 10    | 7959.5    | 79.240  | 83.3   |
| 11    | 7766.4    | 77.319  | 67.1   |
| 12    | 7734.4    | 77.000  | 69.1   |
| 13    | 7702.4    | 76.681  | 67.8   |
| 14    | 5393.7    | 53.697  | 76.2   |
| 15    | 2838.6    | 28.260  | 7.4    |
| 16    | 2797.4    | 27.850  | 8.1    |

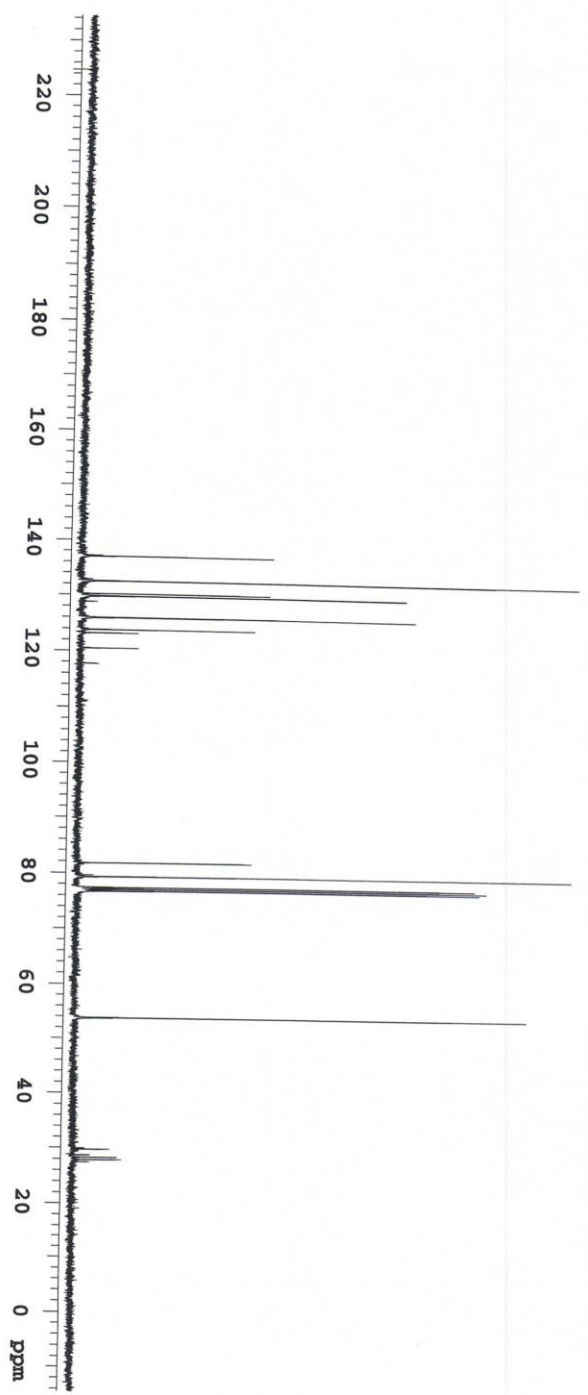

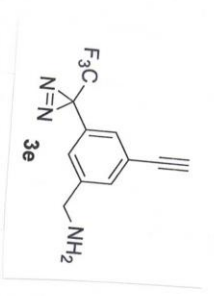

| INDEX | FREQUENCY PPM | HEIGHT  |
|-------|---------------|---------|
| 1     | 14484.8       | 144.203 |
| 2     | 13270.2       | 132.111 |
| 3     | 13260.2       | 132.012 |
| 4     | 13254.1       | 131.951 |
| 5     | 13026.0       | 129.680 |
| 6     | 12917.7       | 128.602 |
| 7     | 12901.7       | 128.442 |
| 8     | 12598.0       | 125.419 |
| 9     | 12384.4       | 123.292 |
| 10    | 12379.0       | 123.239 |
| 11    | 12109.7       | 120.558 |
| 12    | 8285.3        | 82.285  |
| 13    | 7884.6        | 78.495  |
| 14    | 7769.4        | 77.348  |
| 15    | 7757.9        | 77.234  |
| 16    | 7737.3        | 77.029  |
| 17    | 7705.3        | 76.710  |
| 18    | 4578.0        | 45.576  |
| 19    | 2849.2        | 28.365  |
| 20    | 2808.7        | 27.952  |

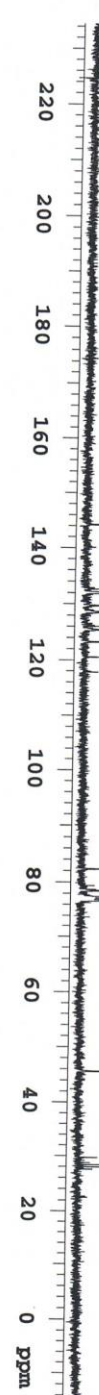

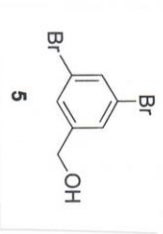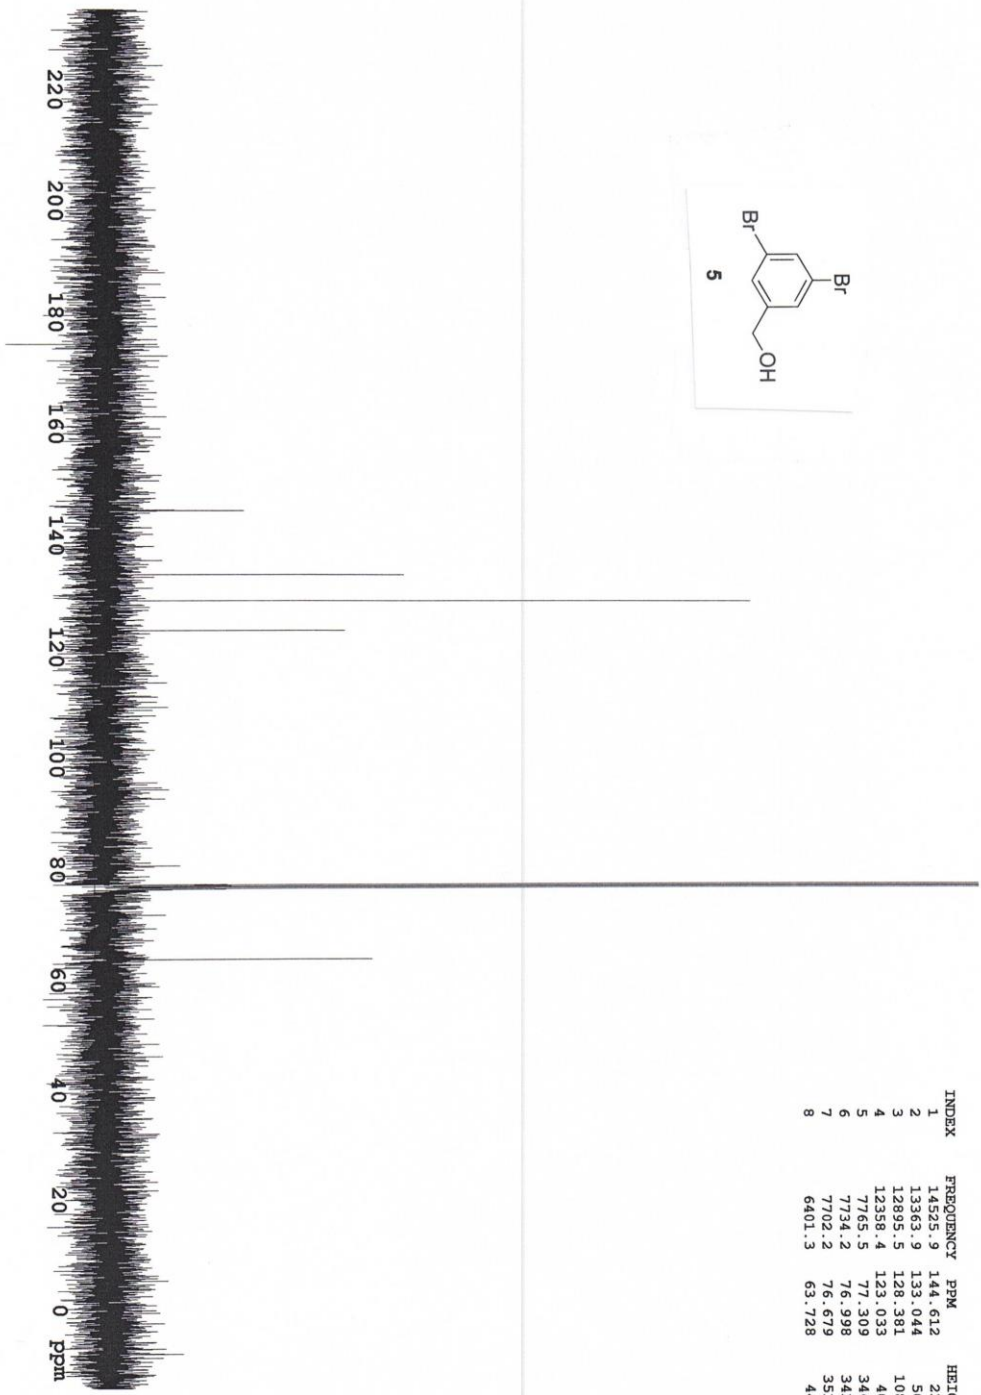

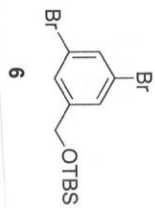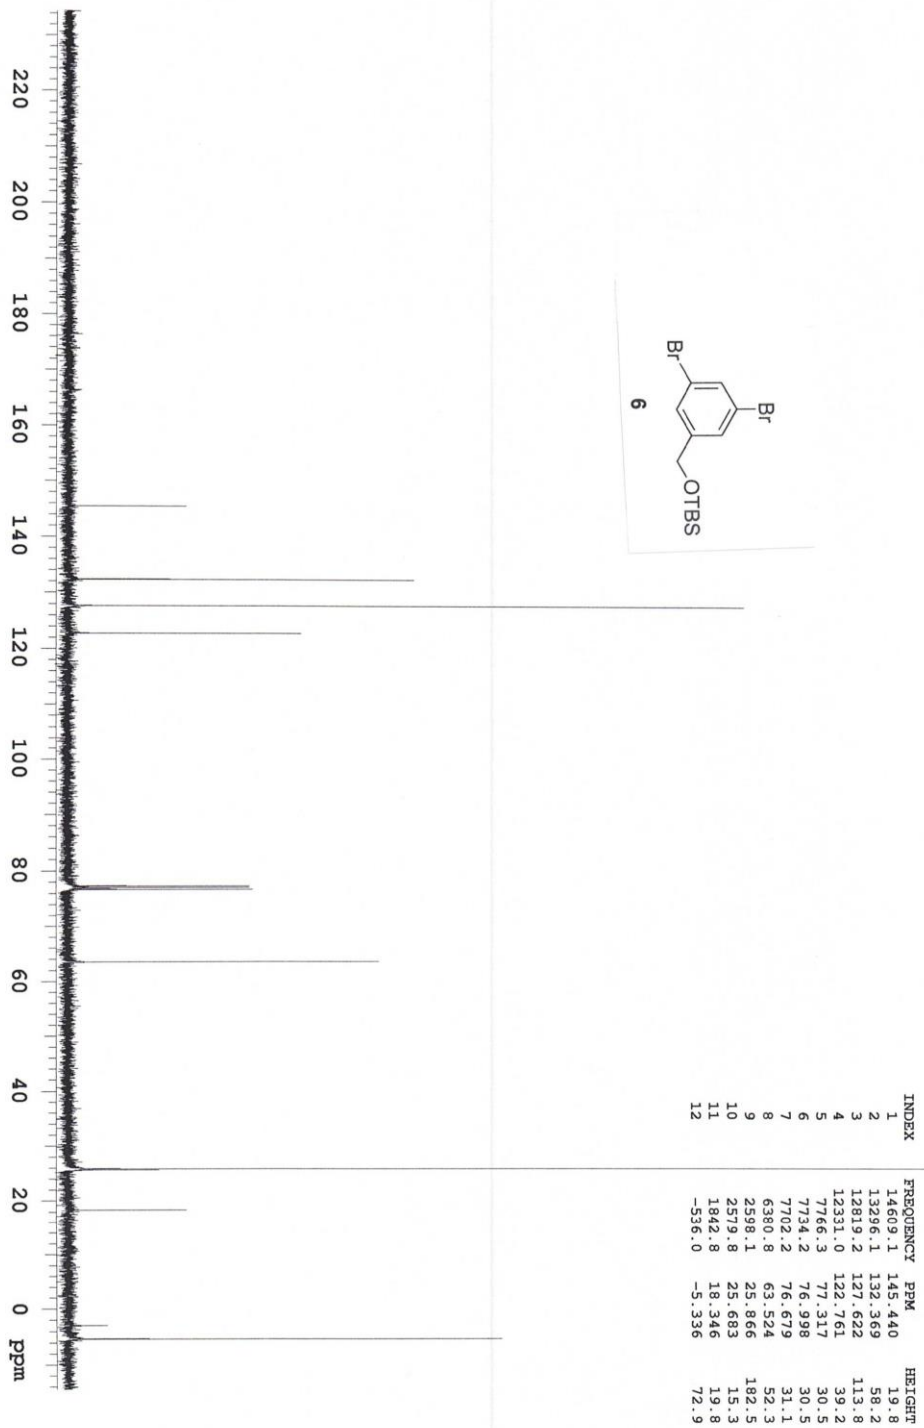

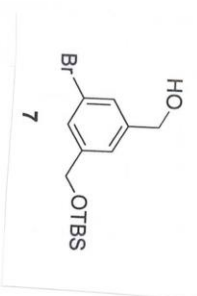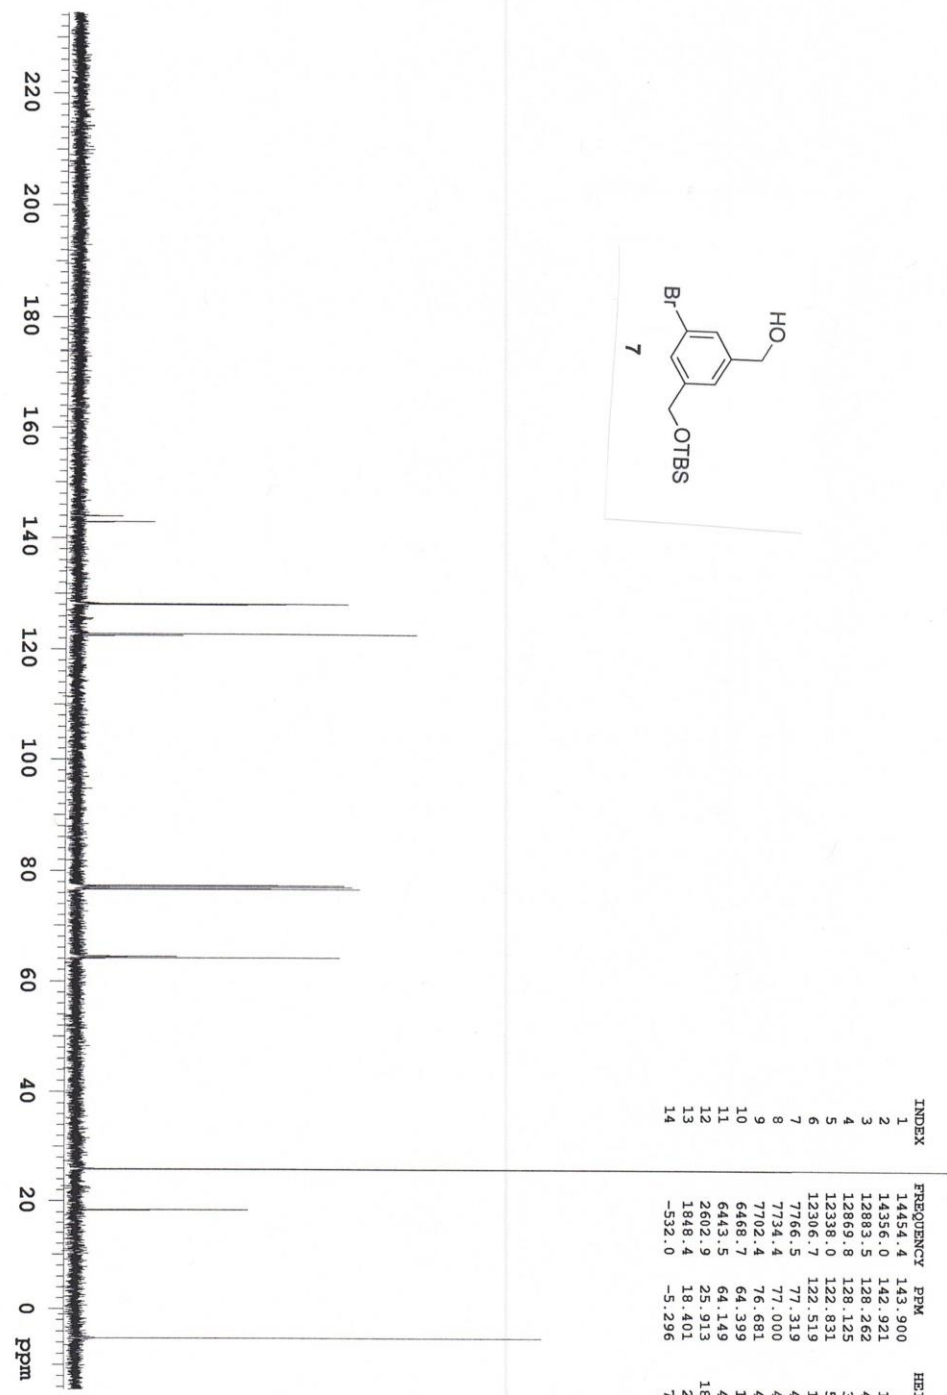

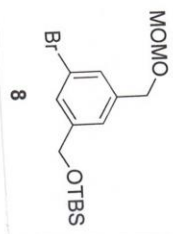

| INDEX | FREQUENCY | PPM     | HEIGHT |
|-------|-----------|---------|--------|
| 1     | 1447.5    | 143.832 | 20.4   |
| 2     | 14063.0   | 140.004 | 12.3   |
| 3     | 12961.3   | 129.036 | 46.5   |
| 4     | 12874.4   | 128.170 | 43.2   |
| 5     | 12421.2   | 123.659 | 46.5   |
| 6     | 12296.1   | 122.413 | 22.0   |
| 7     | 9612.8    | 95.700  | 41.8   |
| 8     | 7766.5    | 77.319  | 15.1   |
| 9     | 7734.4    | 77.000  | 15.5   |
| 10    | 7702.4    | 76.681  | 15.3   |
| 11    | 6854.8    | 68.242  | 37.3   |
| 12    | 6434.4    | 64.057  | 51.7   |
| 13    | 5562.4    | 55.376  | 20.6   |
| 14    | 2602.9    | 25.913  | 12.1   |
| 15    | 2599.1    | 25.875  | 185.2  |
| 16    | 1843.0    | 18.348  | 20.7   |
| 17    | -535.1    | -5.327  | 76.6   |

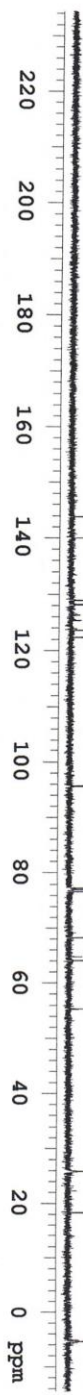

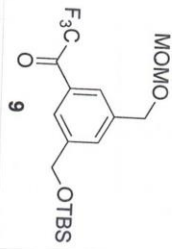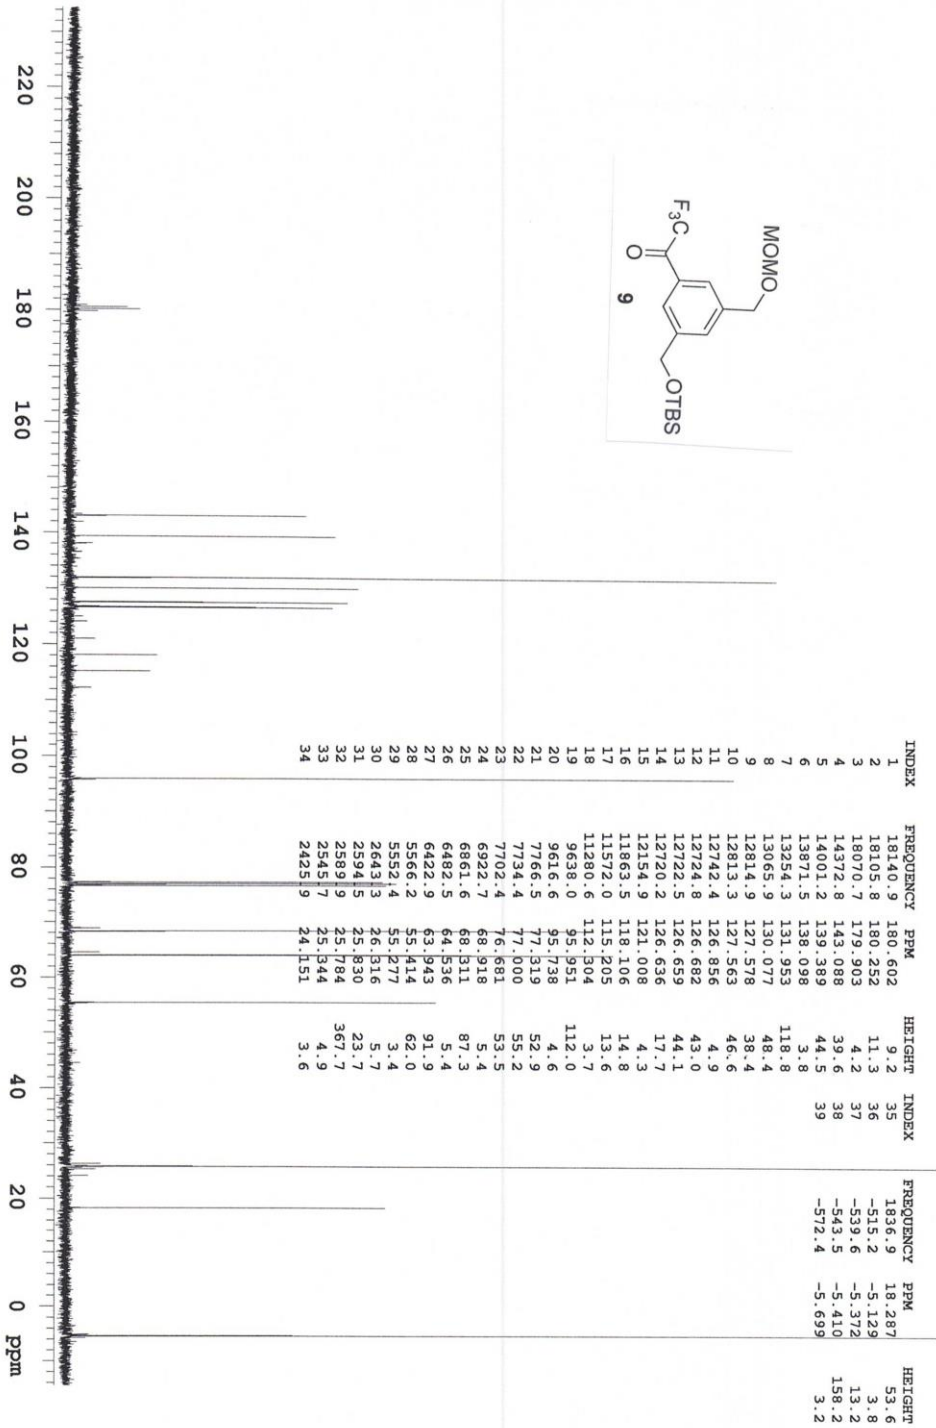



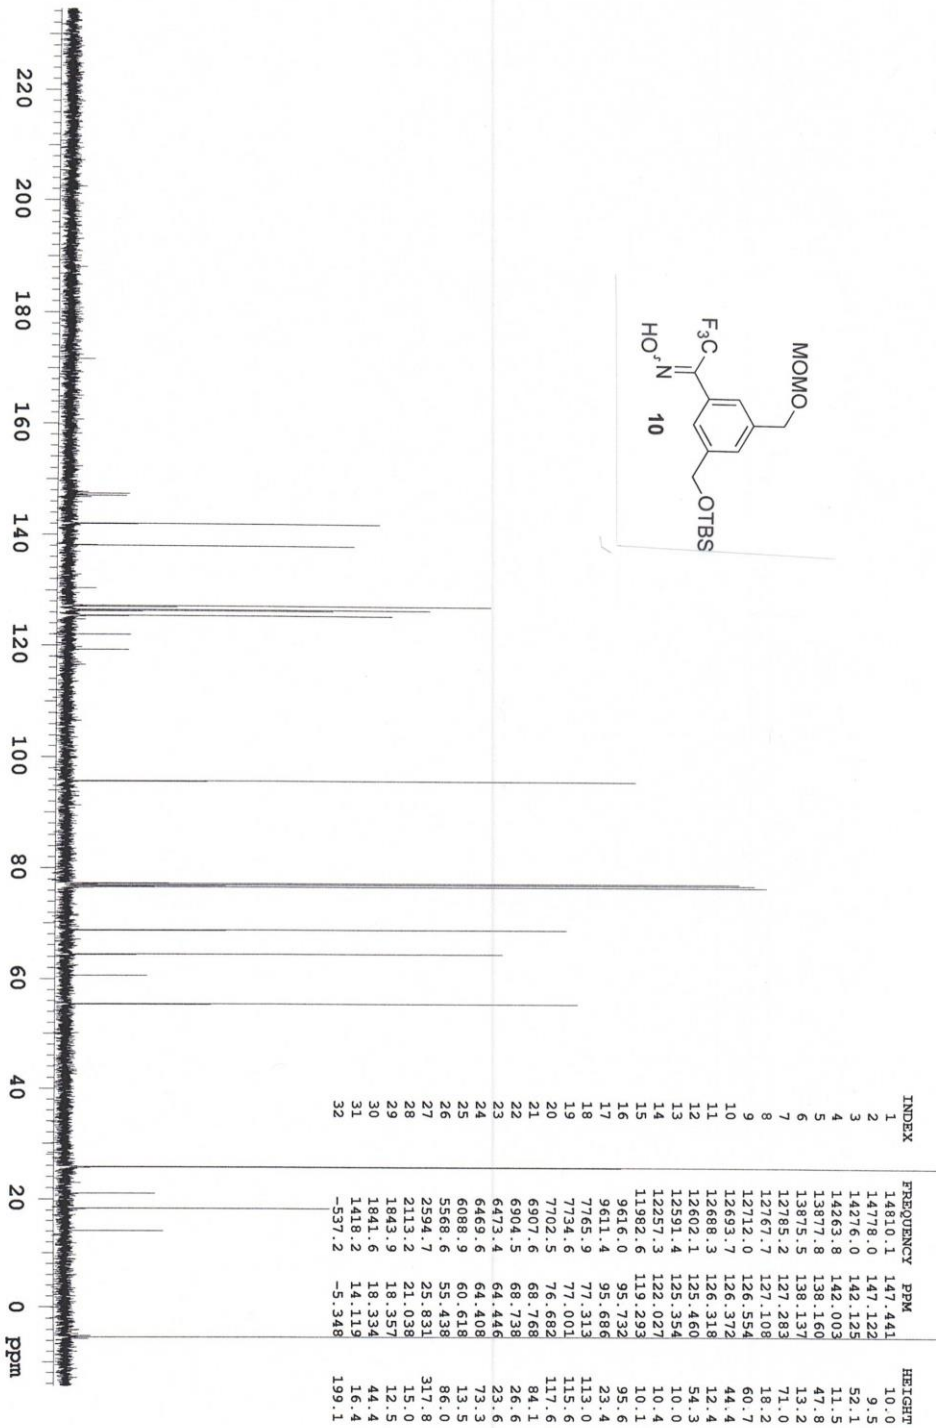

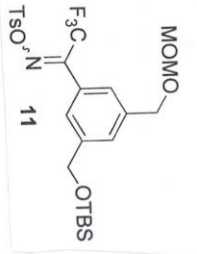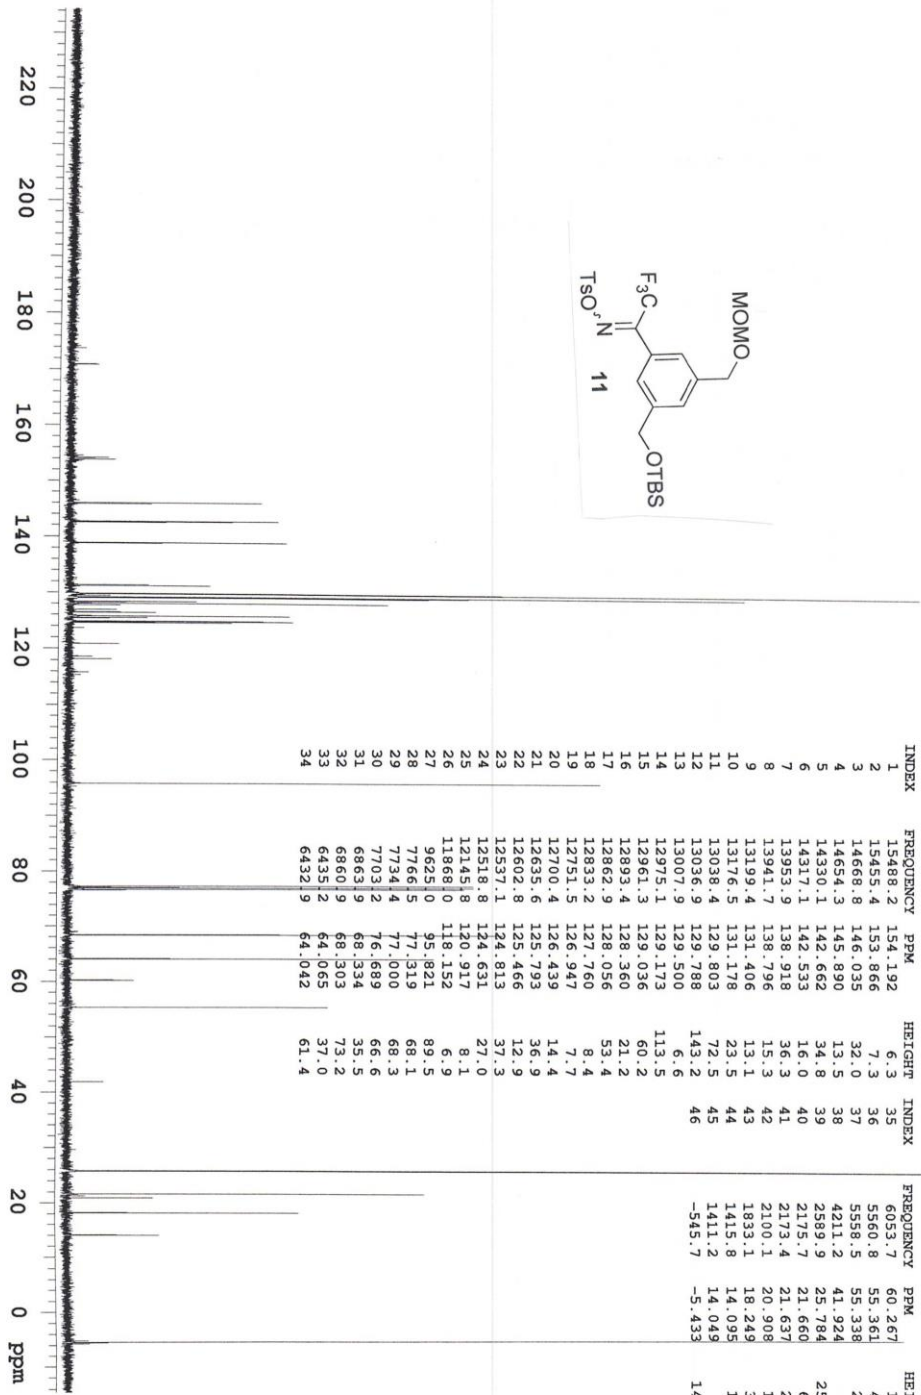

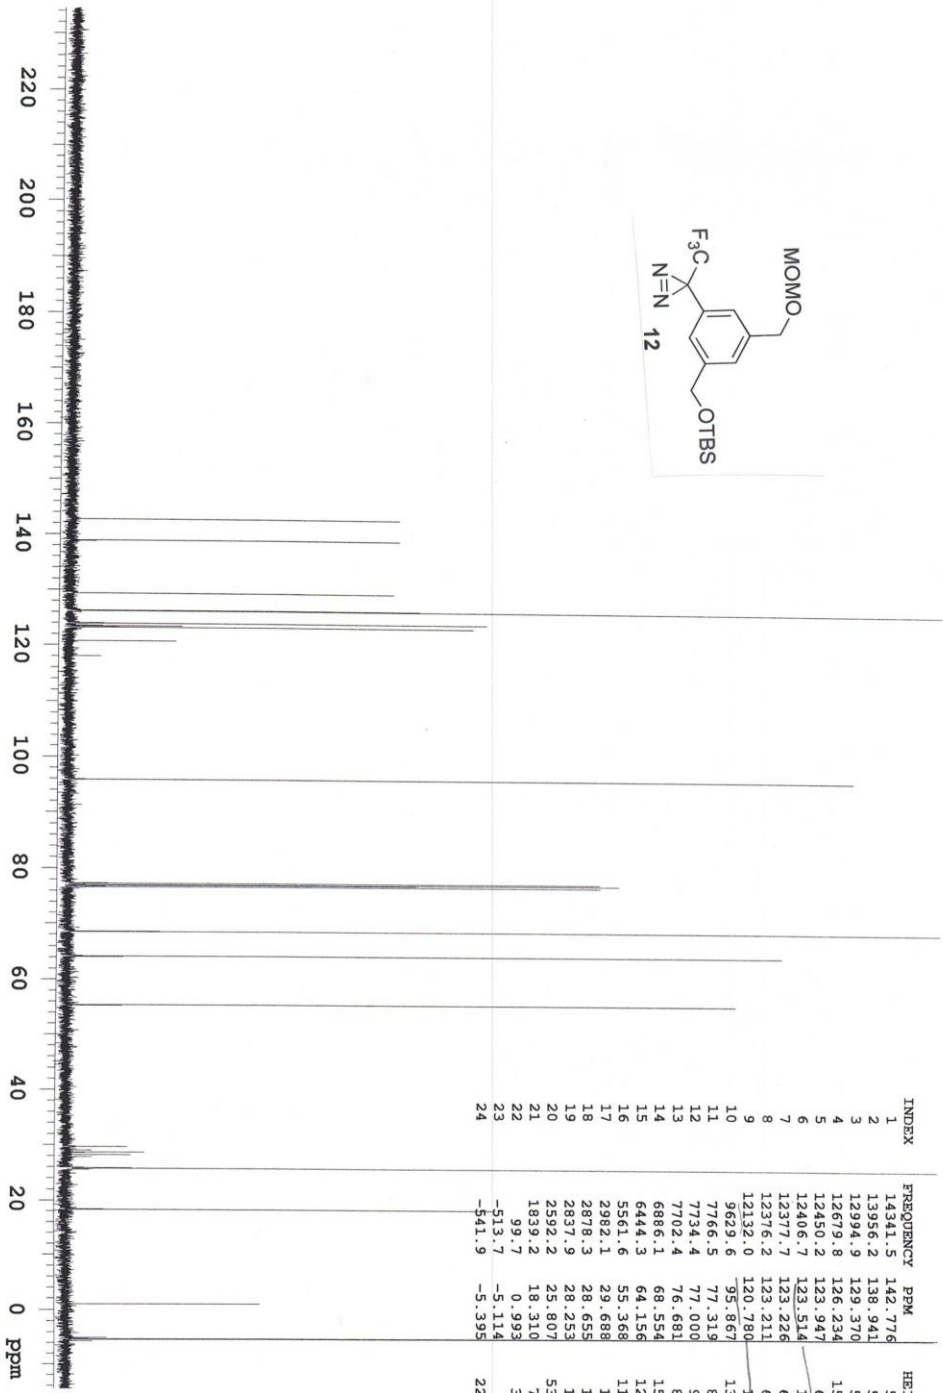

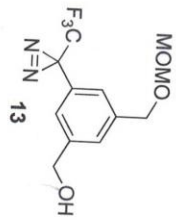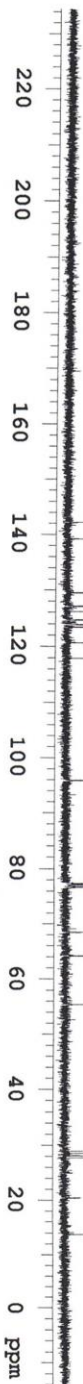

| INDEX | FREQUENCY | PPM     | HEIGHT |
|-------|-----------|---------|--------|
| 1     | 14281.4   | 142.178 | 55.3   |
| 2     | 13983.1   | 139.208 | 42.5   |
| 3     | 13013.4   | 129.555 | 40.9   |
| 4     | 12767.7   | 127.109 | 116.4  |
| 5     | 12670.1   | 126.137 | 5.1    |
| 6     | 12520.5   | 124.648 | 58.3   |
| 7     | 12445.0   | 123.896 | 58.7   |
| 8     | 12395.4   | 123.402 | 15.2   |
| 9     | 12120.8   | 120.668 | 14.0   |
| 10    | 11846.1   | 117.934 | 4.3    |
| 11    | 9628.2    | 95.854  | 120.0  |
| 12    | 7766.7    | 77.321  | 67.4   |
| 13    | 7734.6    | 77.002  | 70.4   |
| 14    | 7702.6    | 76.683  | 70.7   |
| 15    | 6879.4    | 68.487  | 130.2  |
| 16    | 6449.8    | 64.211  | 126.3  |
| 17    | 5561.0    | 55.362  | 72.2   |
| 18    | 2867.8    | 28.551  | 8.6    |
| 19    | 2827.4    | 28.148  | 9.7    |
| 20    | 2787.0    | 27.745  | 3.5    |
| 21    | 1380.1    | 13.740  | 3.4    |

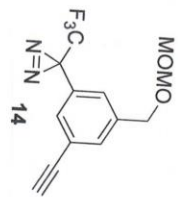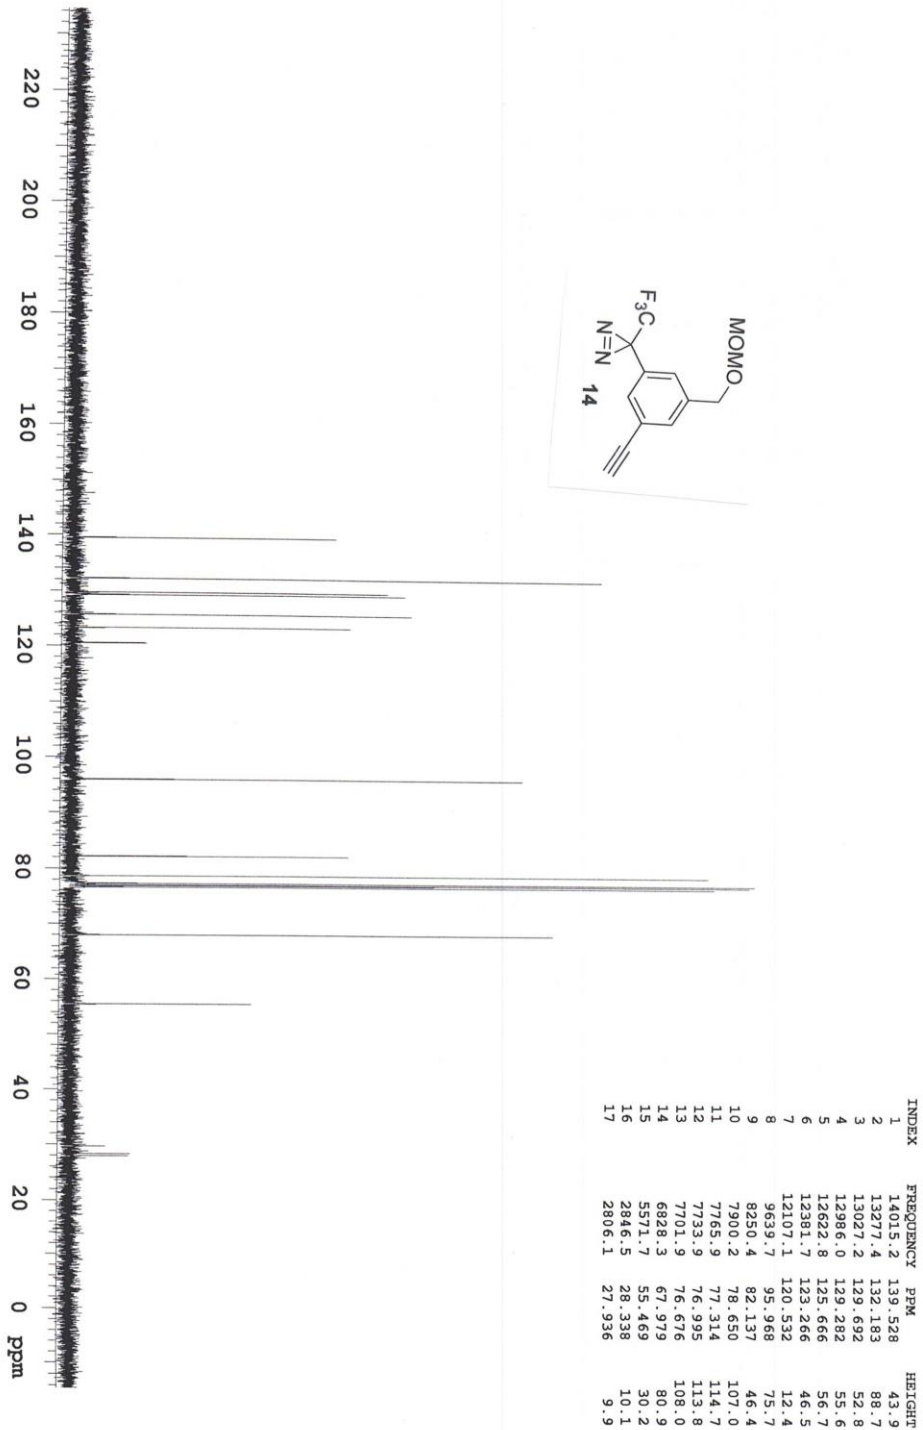

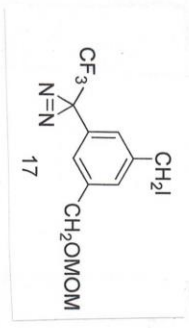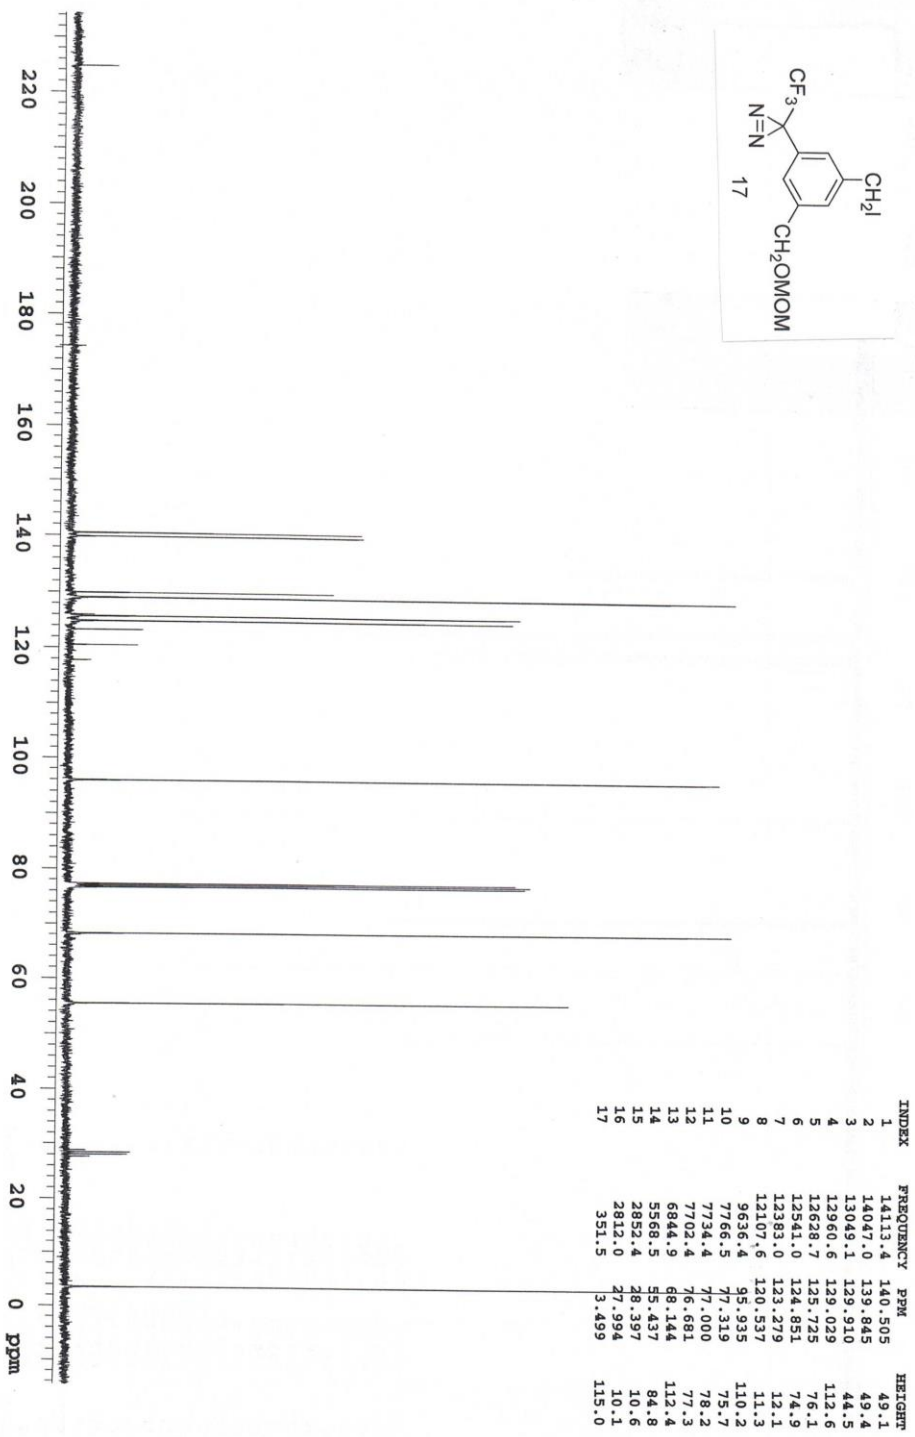

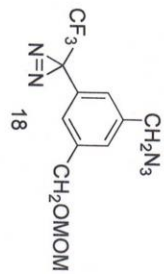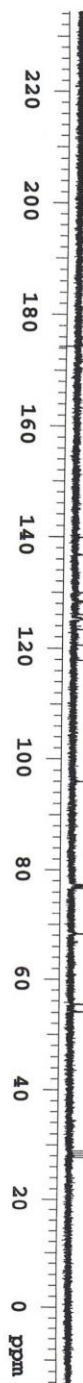

| INDEX | FREQUENCY | PPM     | HEIGHT |
|-------|-----------|---------|--------|
| 1     | 22569.0   | 224.685 | 8.2    |
| 2     | 14053.1   | 139.905 | 37.6   |
| 3     | 13734.2   | 136.730 | 32.2   |
| 4     | 13055.2   | 129.970 | 39.3   |
| 5     | 12893.5   | 128.262 | 81.2   |
| 6     | 12581.4   | 125.254 | 44.9   |
| 7     | 12567.7   | 125.117 | 43.1   |
| 8     | 12566.1   | 125.102 | 45.3   |
| 9     | 12386.8   | 123.317 | 9.0    |
| 10    | 12112.2   | 120.583 | 10.5   |
| 11    | 9637.2    | 95.943  | 88.2   |
| 12    | 7766.5    | 77.319  | 58.9   |
| 13    | 7734.4    | 77.000  | 61.7   |
| 14    | 7702.4    | 76.681  | 61.3   |
| 15    | 6851.7    | 68.212  | 108.5  |
| 16    | 5565.4    | 55.406  | 93.5   |
| 17    | 5431.1    | 54.069  | 94.4   |
| 18    | 2860.8    | 28.480  | 7.8    |
| 19    | 2819.6    | 28.070  | 7.9    |

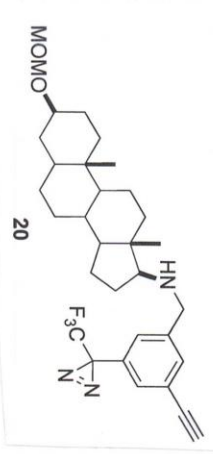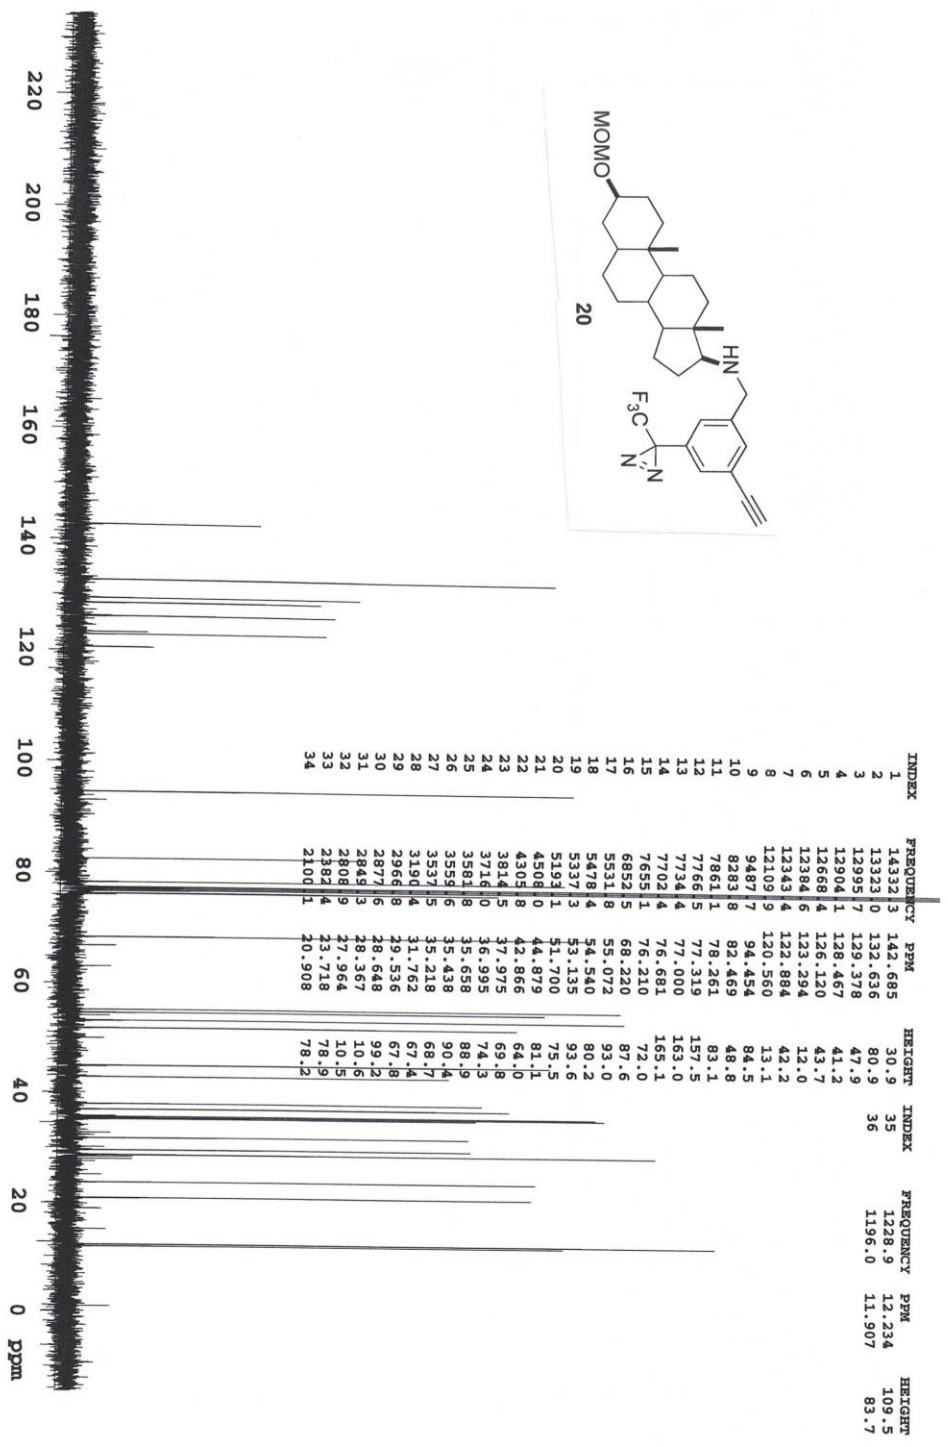



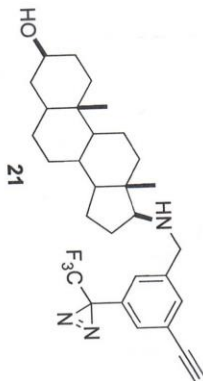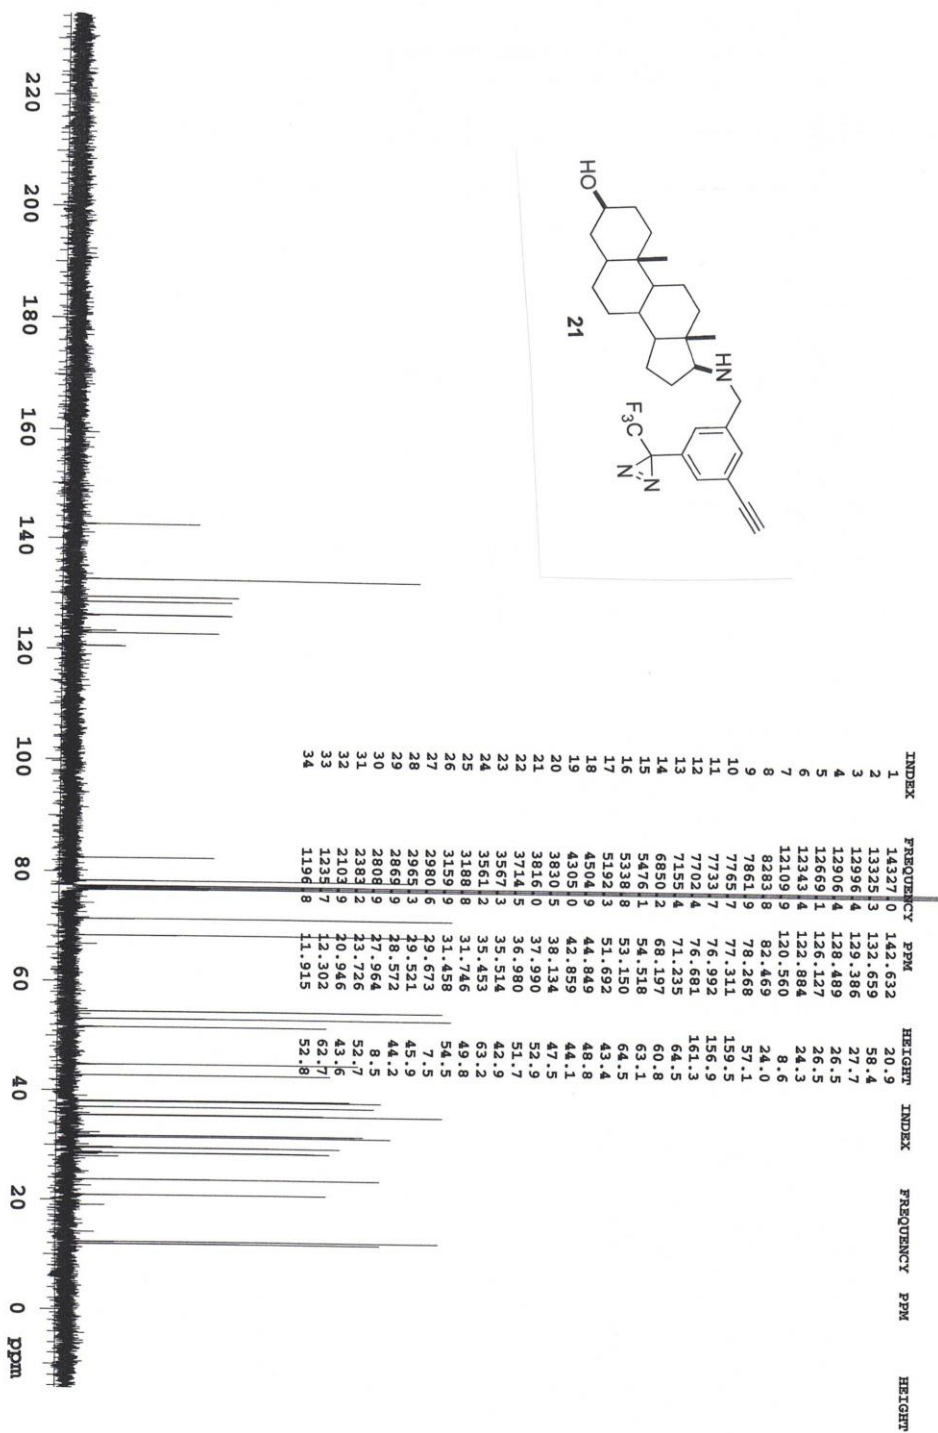

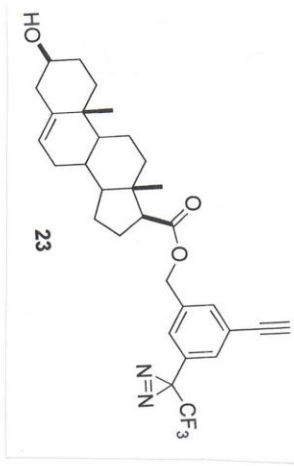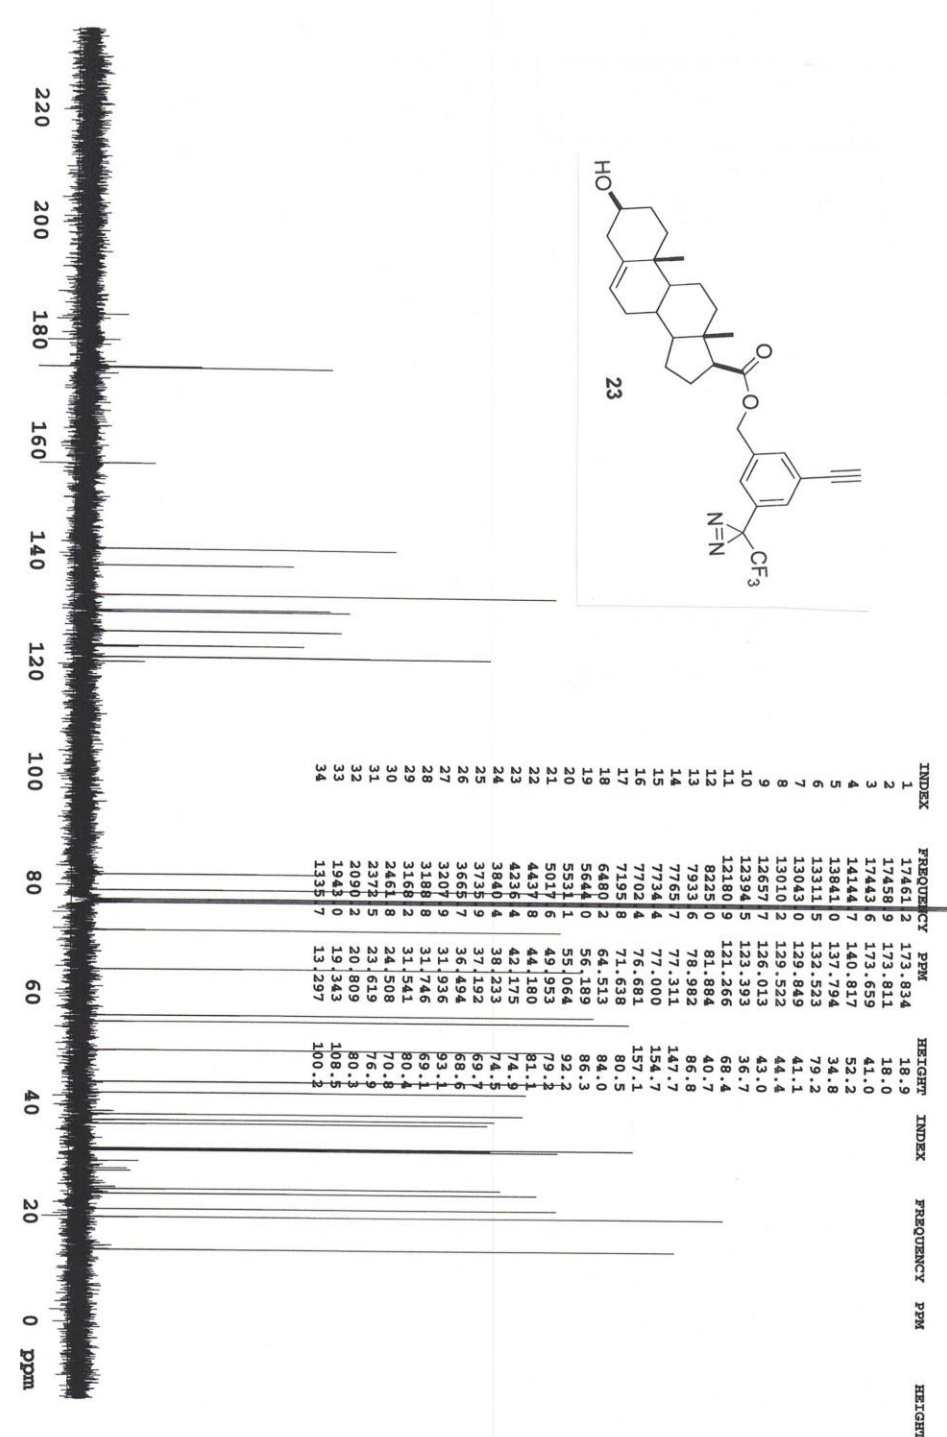

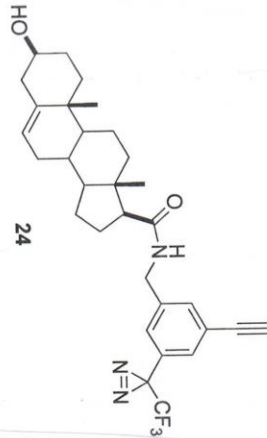

| INDEX | FREQUENCY PPM | HEIGHT  | INDEX | FREQUENCY PPM | HEIGHT |
|-------|---------------|---------|-------|---------------|--------|
| 1     | 130.35        | 172.891 | 16    | 43.018        | 57.056 |
| 2     | 106.14        | 140.785 | 17    | 42.570        | 56.461 |
| 3     | 105.86        | 140.403 | 18    | 37.749        | 50.067 |
| 4     | 99.85         | 133.438 | 19    | 32.181        | 42.681 |
| 5     | 97.96         | 129.935 | 20    | 31.112        | 43.917 |
| 6     | 97.29         | 129.035 | 21    | 31.835        | 42.224 |
| 7     | 94.79         | 128.724 | 22    | 29.132        | 38.638 |
| 8     | 93.11         | 123.496 | 23    | 28.073        | 37.234 |
| 9     | 91.47         | 121.329 | 24    | 27.544        | 36.532 |
| 10    | 59.44         | 78.846  | 25    | 25.57         | 33.522 |
| 11    | 58.40         | 77.458  | 26    | 24.04         | 31.893 |
| 12    | 58.37         | 77.427  | 27    | 23.95         | 31.771 |
| 13    | 58.05         | 77.000  | 28    | 23.81         | 31.588 |
| 14    | 57.73         | 76.573  | 29    | 22.37         | 29.680 |
| 15    | 54.05         | 71.690  | 30    | 19.29         | 25.591 |
| 16    | 43.01         | 57.056  | 31    | 18.78         | 24.919 |
| 17    | 42.57         | 56.461  | 32    | 18.46         | 24.492 |
| 18    | 37.74         | 50.067  | 33    | 17.86         | 23.699 |
| 19    | 32.18         | 42.681  | 34    | 15.75         | 20.891 |
| 20    | 31.11         | 43.917  |       |               |        |
| 21    | 31.83         | 42.224  |       |               |        |
| 22    | 29.13         | 38.638  |       |               |        |
| 23    | 28.07         | 37.234  |       |               |        |
| 24    | 27.54         | 36.532  |       |               |        |
| 25    | 25.57         | 33.522  |       |               |        |
| 26    | 24.04         | 31.893  |       |               |        |
| 27    | 23.95         | 31.771  |       |               |        |
| 28    | 23.81         | 31.588  |       |               |        |
| 29    | 22.37         | 29.680  |       |               |        |
| 30    | 19.29         | 25.591  |       |               |        |
| 31    | 18.78         | 24.919  |       |               |        |
| 32    | 18.46         | 24.492  |       |               |        |
| 33    | 17.86         | 23.699  |       |               |        |
| 34    | 15.75         | 20.891  |       |               |        |

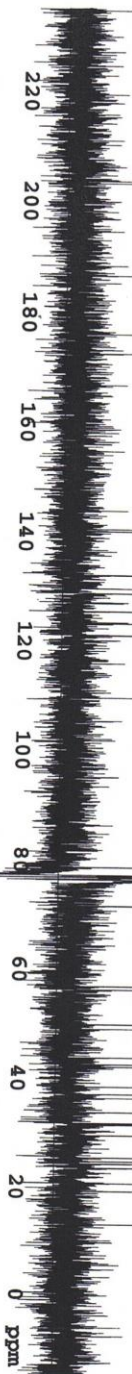

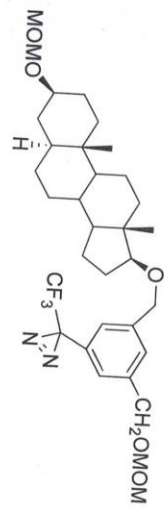

26

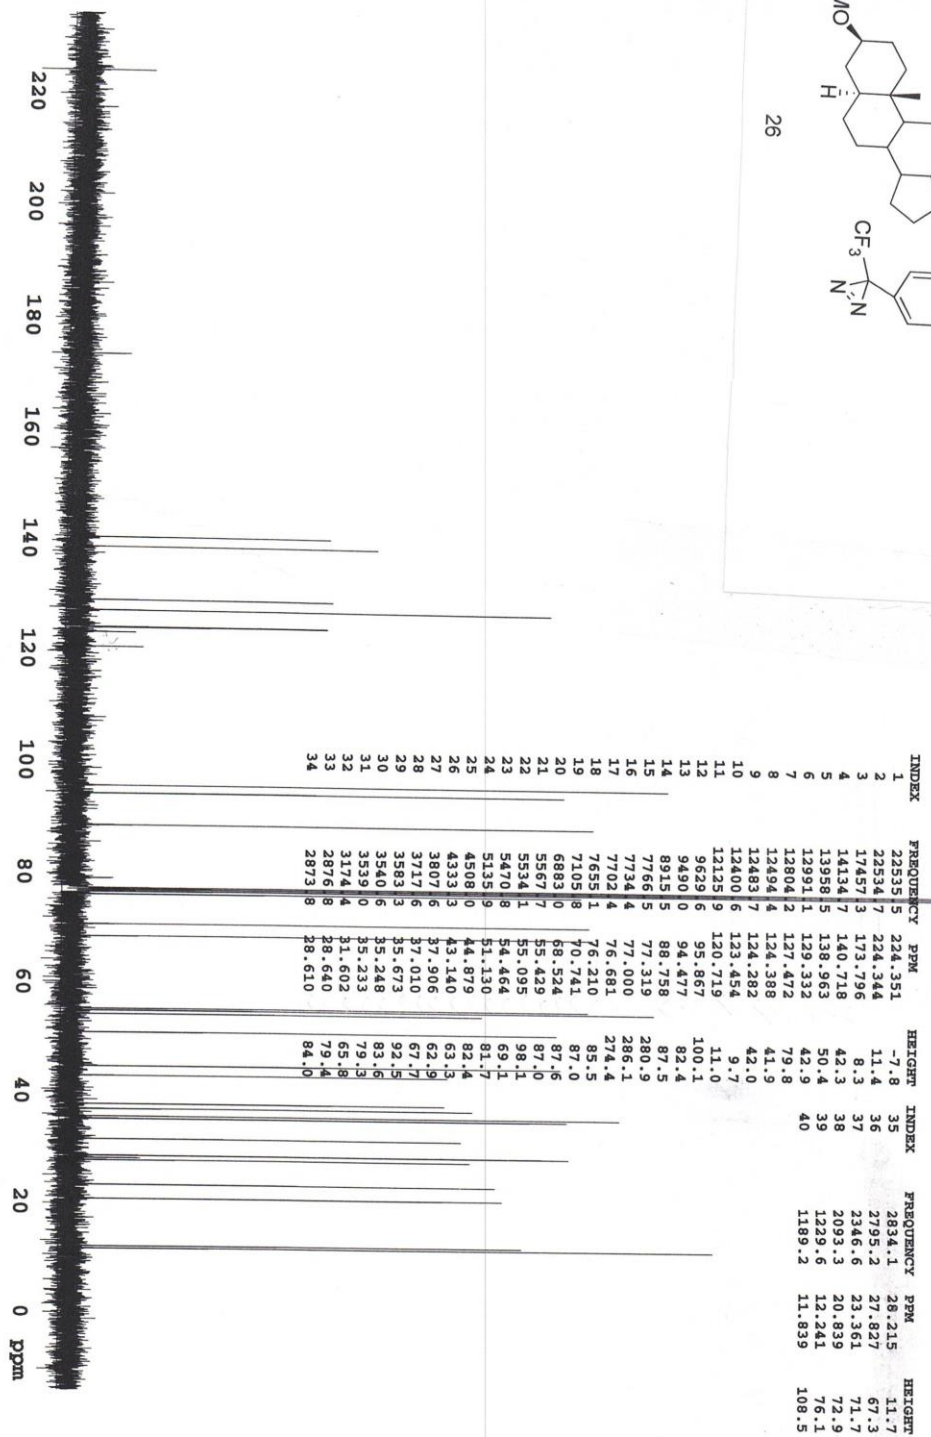

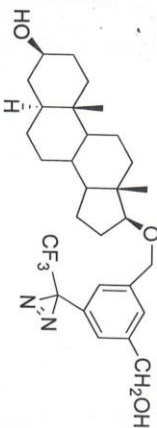

27

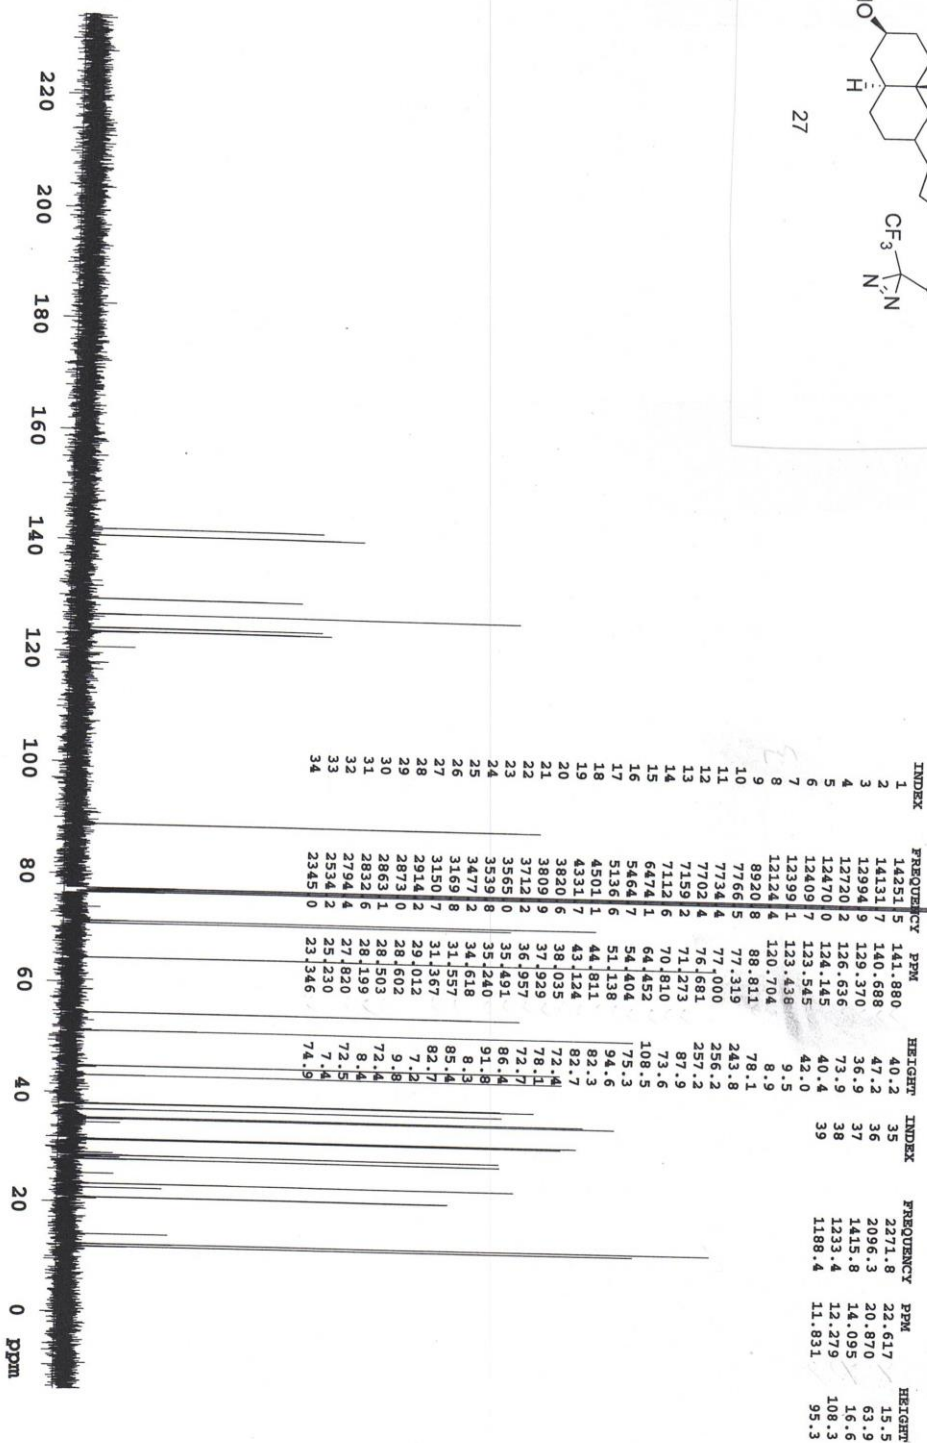

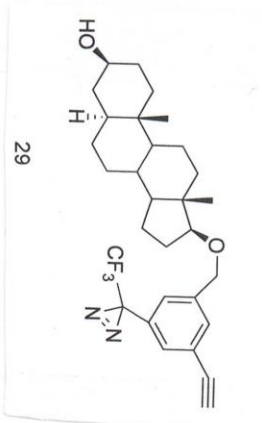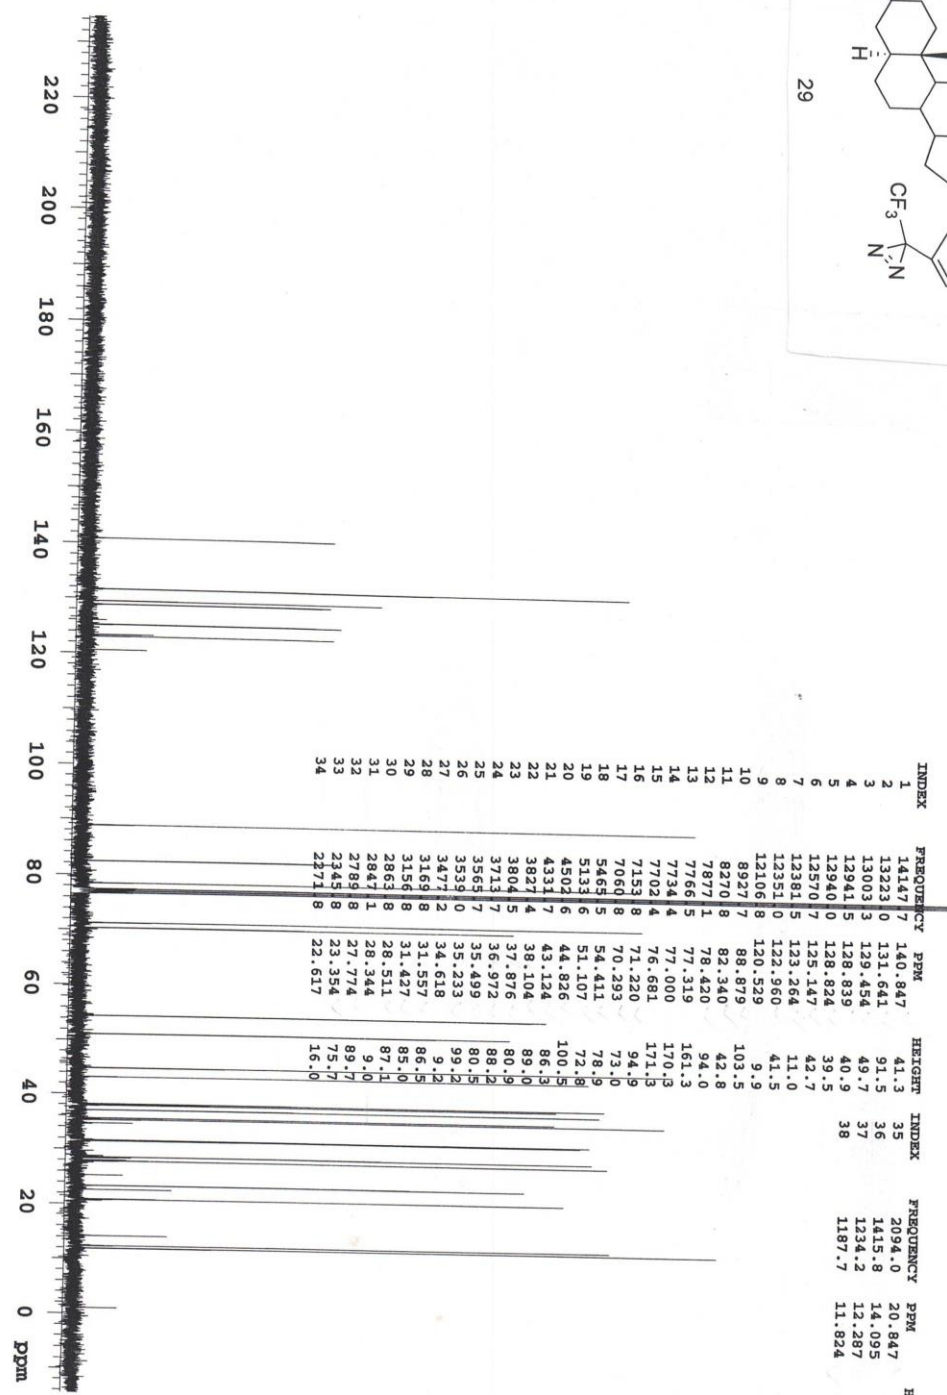

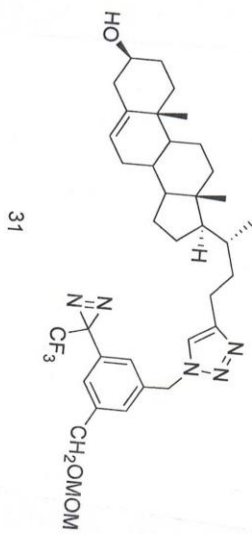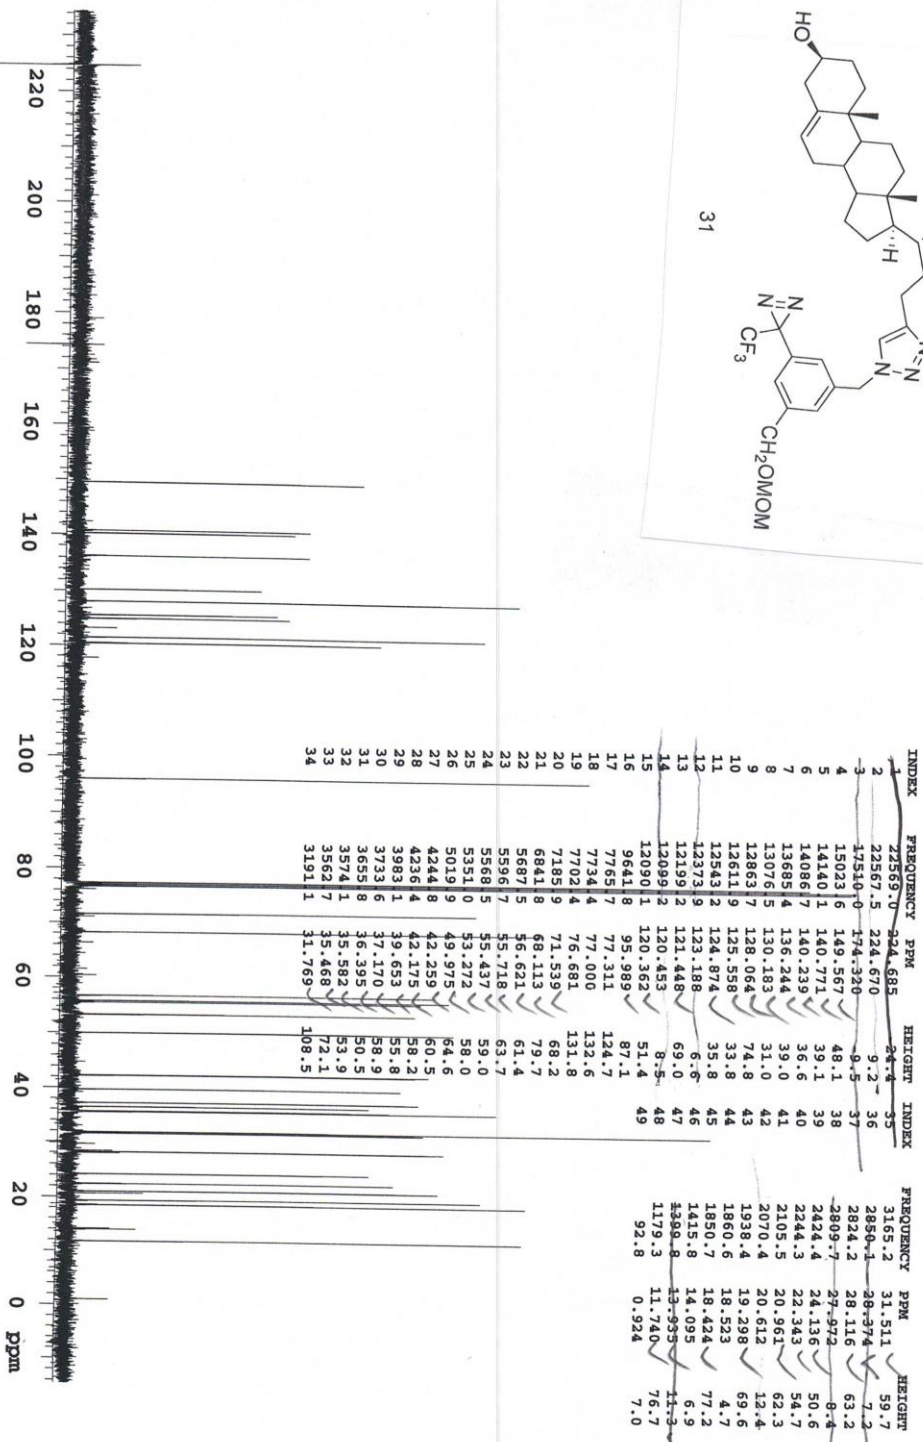

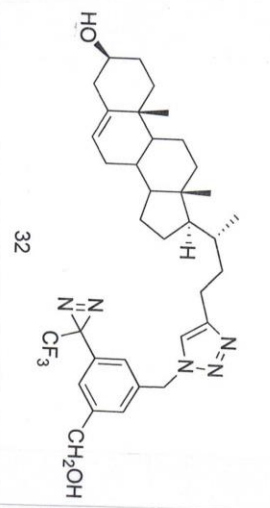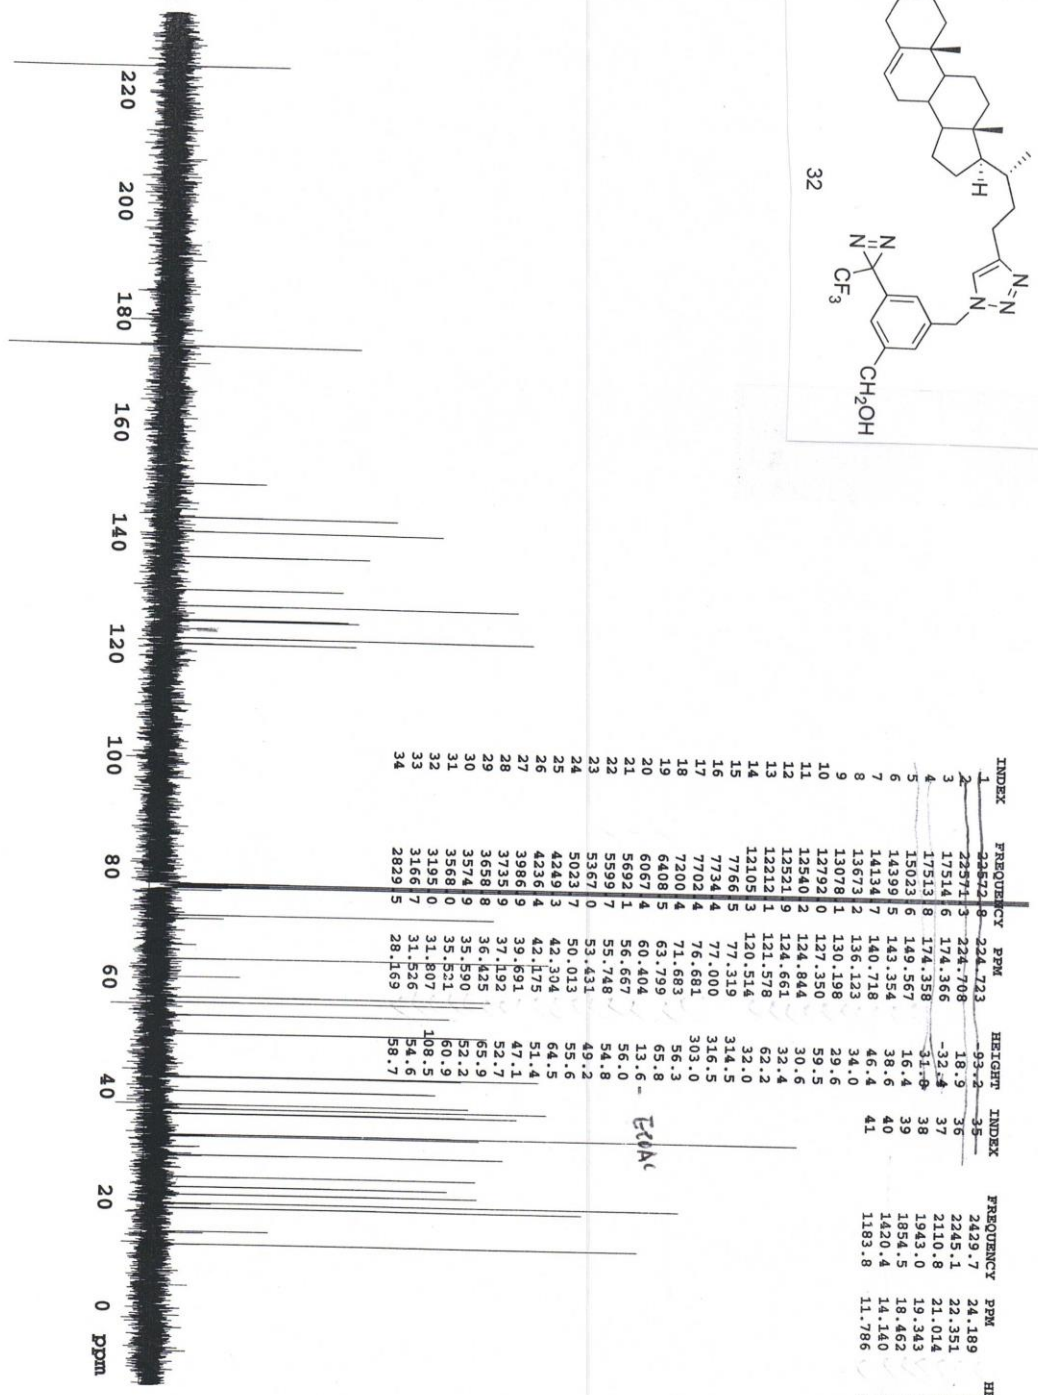



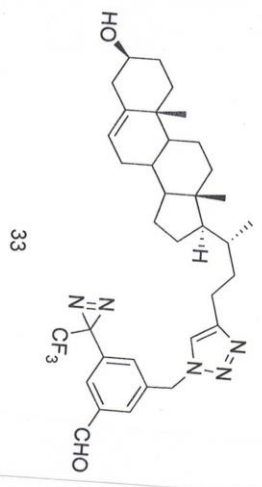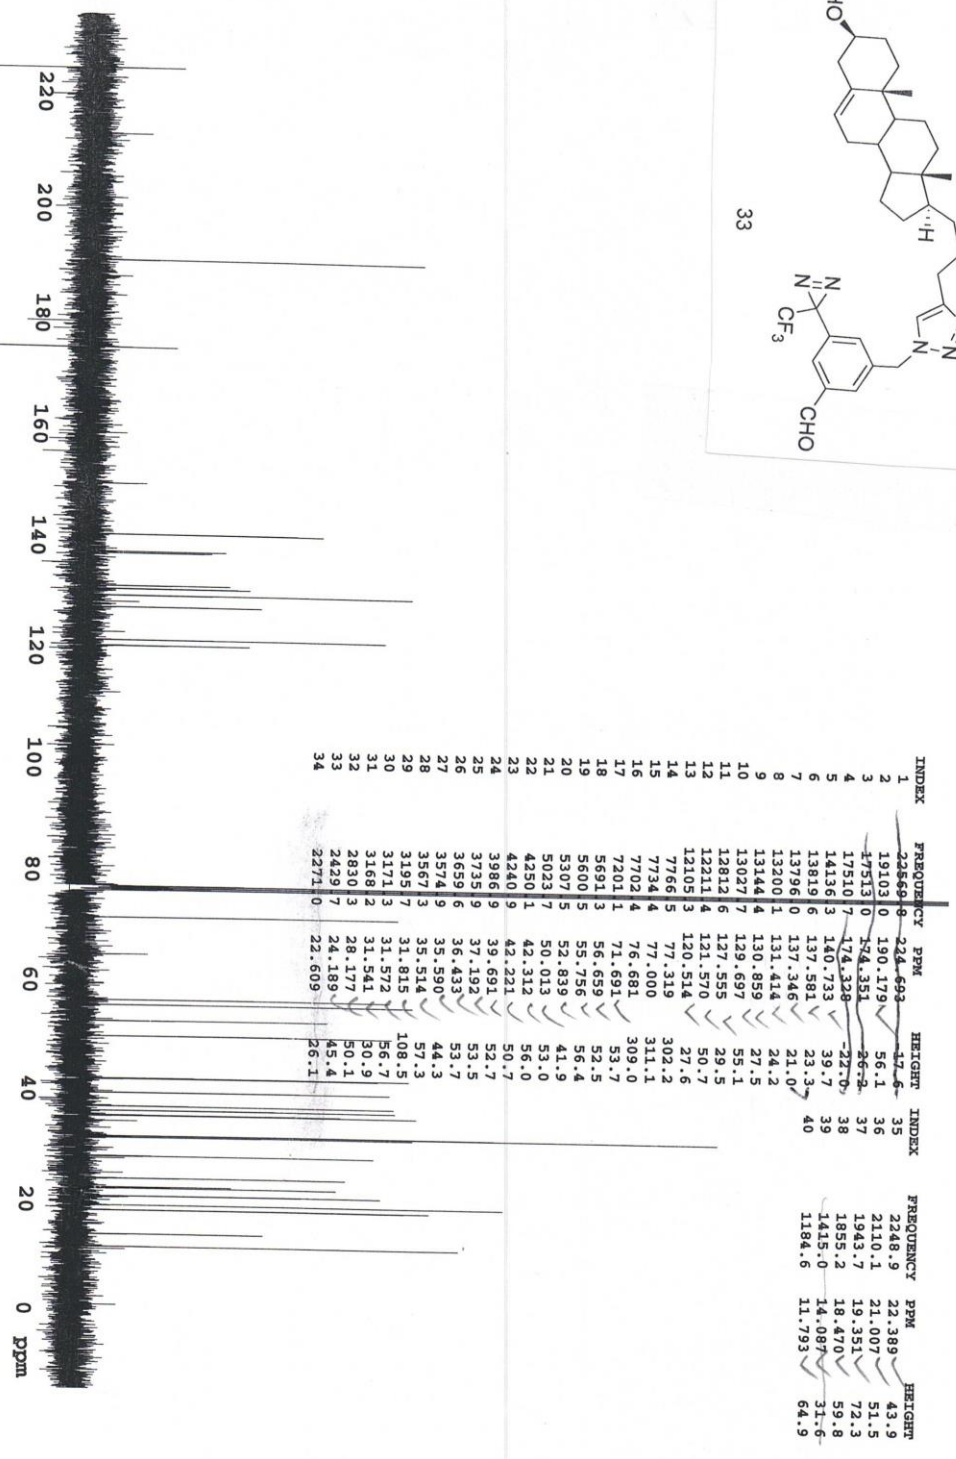

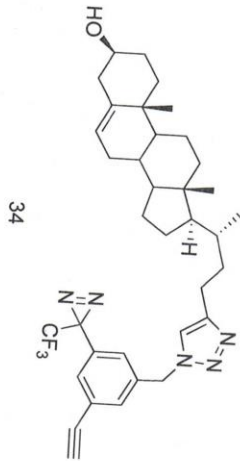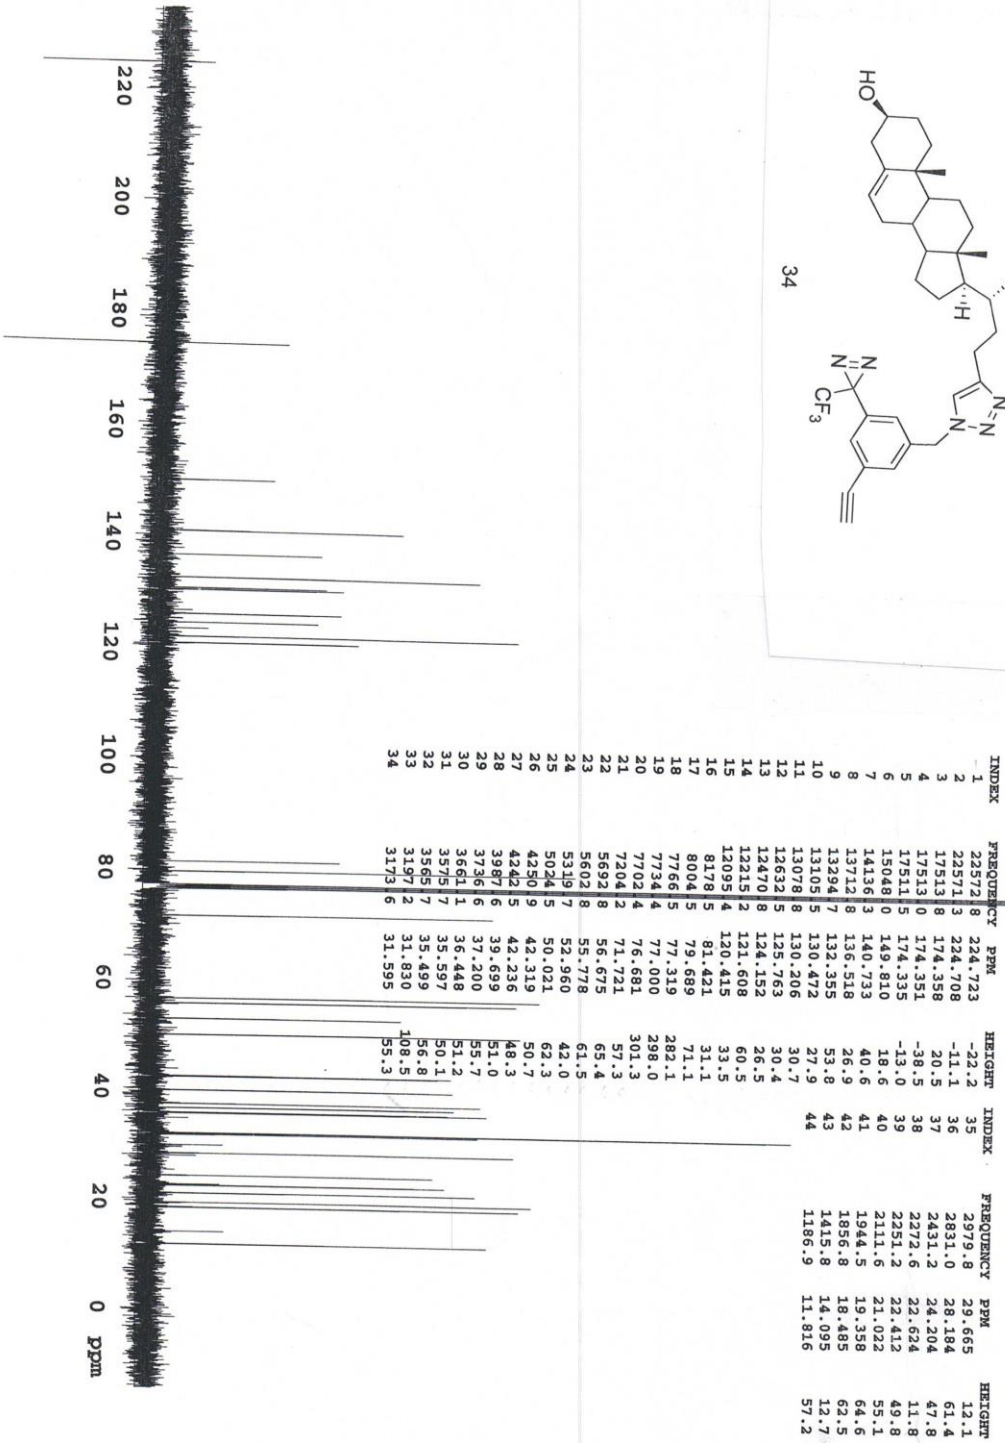

Supplement: d3ra07260f1.pdf [file d3ra07260f1.pdf]
